# Supplementary material for: Direct synthesis of fluorene-based spirolactones through a BF3-promoted spiroannulation of α-keto acids and o-alkynylbiaryls
Source: Royal Society of Chemistry journal article supplement (doi:10.1039/d2qo01523d), 2022-11-24

## *Supporting Information*

### **Direct synthesis of fluorene-based spirolactones through a BF<sub>3</sub>-promoted spiroannulation of $\alpha$ -keto acids and *o*-alkynyl biaryls**

Qingting Song,<sup>a</sup> Zhen Zhang,<sup>a</sup> Xiaoyu Xie,<sup>a</sup> Guang-Zhu Ding,<sup>\*a</sup> Pinhua Li,<sup>a</sup> Lei Wang,<sup>a,b,c</sup> and Tao Miao<sup>\*,a</sup>

<sup>a</sup>Key Laboratory of Green and Precise Synthetic Chemistry and Application, Ministry of Education; Department of Chemistry, Huaibei Normal University, Huaibei, Anhui 235000, P. R. China, E-mail: taomiao@chnu.edu.cn, dinggz@chnu.edu.cn

<sup>b</sup>Advanced Research Institute and Department of Chemistry, Taizhou University, Taizhou, Zhejiang 318000, P. R. China

<sup>c</sup>State Key Laboratory of Organometallic Chemistry, Shanghai Institute of Organic Chemistry, Chinese Academy of Sciences, Shanghai 200032, P. R. China

### **Table of Contents**

|                                                                                                                   |     |
|-------------------------------------------------------------------------------------------------------------------|-----|
| 1. General information.....                                                                                       | S2  |
| 2. Experimental section                                                                                           |     |
| 2.1 General procedure for the synthesis of <i>o</i> -alkynyl biaryls ( <b>2</b> ) .....                           | S2  |
| 2.2 General procedure for the synthesis of <b>3a</b> .....                                                        | S3  |
| 2.3 General procedure for the synthesis of <b>4</b> .....                                                         | S4  |
| 3. The mechanism experiment                                                                                       |     |
| 3.1 General procedure for the synthesis of <b>5</b> .....                                                         | S4  |
| 3.2 General procedure for the transformation of <b>5</b> to <b>3a</b> .....                                       | S5  |
| 4. X-ray structural analysis of <b>3a</b> and <b>5</b> .....                                                      | S5  |
| 5. Characterization data for <i>o</i> -alkynyl biaryls ( <b>2</b> ) and all products.....                         | S12 |
| 6. <sup>1</sup> H and <sup>13</sup> C NMR spectra of <i>o</i> -alkynyl biaryls ( <b>2</b> ) and all products..... | S42 |

## 1. General information

Unless otherwise specified, the chemicals and solvents are purchased from commercial suppliers without further purification. All experiments were monitored by analytical thin layer chromatography (TLC) which was performed on pre-coated silica gel plates. Products were purified by flash chromatography on 100–200 mesh silica gels, SiO<sub>2</sub>. <sup>1</sup>H NMR and <sup>13</sup>C NMR spectra were measured on a Bruker Avance NMR spectrometer (600 MHz) in CDCl<sub>3</sub> or DMSO-*d*<sub>6</sub> as solvent and recorded in ppm relative to internal standard tetramethylsilane. <sup>1</sup>H NMR data are reported as follows: δ, chemical shift; coupling constants (*J* are given in Hertz, Hz) and integration. Abbreviations to denote the multiplicity of a particular signal were s (singlet), d (doublet), t (triplet), q (quartet), br (broad singlet) and m (multiplet). High resolution mass spectroscopic data of the products were obtained on an Agilent Technologies 6540 UHD Accurate-Mass Q-TOF LC/MS using ESI.

## 2. Experimental section

### 2.1 General procedure for the synthesis of *o*-alkynyl biaryls (**2**)

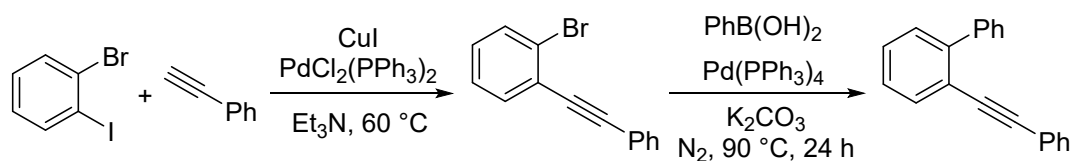

All *o*-alkynyl biaryls (**2**) were synthesized on the basis of reported method [See: Milián, A.; García-García, P.; Pérez-Redondo, A.; Sanz, R.; Vaquero, J. J.; Fernández-Rodríguez, M. A. *Org. Lett.* **2020**, *22*, 8464–8469]. A typical experimental procedure for the synthesis of 2-(phenylethynyl)-1,1'-biphenyl (**2a**) involves a Sonogashira and Suzuki couplings:

**Step 1:** 1-Bromo-2-iodobenzene (1.42 g, 5 mmol), phenylacetylene (0.62 g, 6 mmol), PdCl<sub>2</sub>(PPh<sub>3</sub>)<sub>2</sub> (140 mg, 0.04 equiv), CuI (47.6 mg, 0.05 equiv) were added into a 50 mL round bottom flask with 20 mL of Et<sub>3</sub>N. The resulting mixture was evacuated and backfilled with nitrogen for 3 times. Then, the mixture was stirred, and was heated by an oil bath at 60 °C under nitrogen atmosphere. Upon completion (monitored by TLC), the mixture was cooled to room temperature, and ethyl acetate and distilled water were added. The aqueous layer was extracted with ethyl acetate for 3 times (20 mL×3). Then the organic phase was combined and dried over anhydrous MgSO<sub>4</sub>. The organic layer removed in vacuo and the residue was purified by column

chromatography on silica gel by using a mixture of petroleum ether/ethyl acetate as an eluent to provide 1-bromo-2-(phenylethynyl)benzene in 81% yield (1.04 g).

**Step 2:** 1-Bromo-2-(phenylethynyl)benzene (1.30 g, 5 mmol) obtained in the step 1, phenylboronic acid (0.85 g, 7 mmol), Pd(PPh<sub>3</sub>)<sub>4</sub> (57.8 mg, 0.01 equiv.) and K<sub>2</sub>CO<sub>3</sub> (1.73 g, 2.5 equiv.) were added to a round bottom flask with mixture of toluene and methanol (3/1). The Schlenk flask was evacuated and backfilled with nitrogen for 3 times. Then, the mixture was stirred, and was heated by an oil bath at 90°C for 24 h under nitrogen atmosphere. Upon completion (monitored by TLC), the mixture was cooled to room temperature, and ethyl acetate and distilled water were added. The aqueous layer was extracted with ethyl acetate for 3 times (20 mL×3). Then the organic phase was combined and dried over anhydrous MgSO<sub>4</sub>. The organic layer removed in vacuo and the residue was purified by column chromatography on silica gel by using petroleum ether as an eluent to provide 2-(phenylethynyl)-1,1'-biphenyl in 86% yield (1.10 g).

## 2.2 General procedure for the synthesis of 3

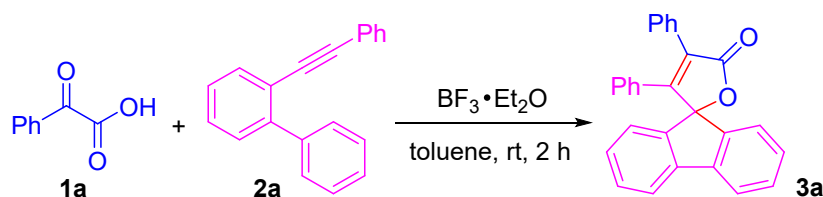

### Typical procedure for the synthesis of 3a in 0.25 mmol scale:

A Schlenk tube (10 mL) equipped with magnetic stir bar was charged with 2-Oxo-2-phenylacetic acid (**1a**, 60.1 mg, 0.40 mmol), 2-(phenylethynyl)-1,1'-biphenyl (**2a**, 63.6 mg, 0.25 mmol), BF<sub>3</sub>·Et<sub>2</sub>O (71.0 mg, 0.50 mmol) and toluene (2 mL). Then, the mixture was stirred at room temperature for 2 h. After the reaction was completed, the solvent was removed in vacuo, and the resulting crude mixture was purified by flash chromatography on silica gel (petroleum ether/EtOAc= 9:1) to provide target product (**3a**, 92.7 mg) in 96% yield.

### Typical procedure for the synthesis of 3a in 2.5 mmol scale:

A Schlenk tube (100 mL) equipped with magnetic stir bar was charged with 2-Oxo-2-phenylacetic acid (**1a**, 0.60 g, 4.0 mmol), 2-(phenylethynyl)-1,1'-biphenyl (**2a**, 0.64 g, 2.5 mmol), BF<sub>3</sub>·Et<sub>2</sub>O (0.71 g, 5.0 mmol) and toluene (20 mL). Then, the mixture was stirred at room temperature for 2 h. After the reaction was completed, the solvent

was removed in vacuo, and the resulting crude mixture was purified by flash chromatography on silica gel (petroleum ether/EtOAc= 9:1) to provide target product (**3a**, 0.89 g) in 92% yield.

### 2.3 General procedure for the synthesis of **4**

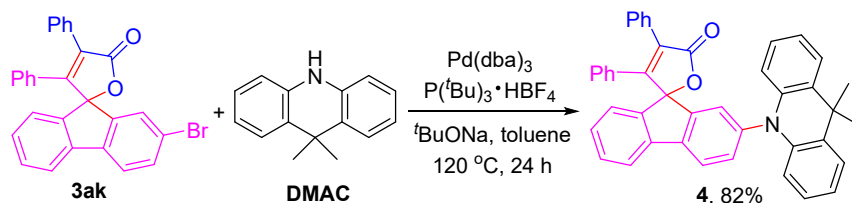

To a solution of 2-bromo-3',4'-diphenyl-5'H-spiro[fluorene-9,2'-furan]-5'-one (**3ak**, 174.0 mg, 0.375 mmol) in toluene (5 mL) was added Pd<sub>2</sub>(dba)<sub>3</sub> (12 mg, 0.05 equiv.), *t*BuONa (60 mg, 2.5 equiv.), (*t*Bu)<sub>3</sub>P·HBF<sub>4</sub> (11 mg, 0.15 equiv.) and 9,9-dimethyl-9,10-dihydroacridine (DMAC, 52.3 mg, 0.25 mmol). The reaction mixture was evacuated and backfilled with nitrogen for 3 times, and was refluxed under nitrogen for 24 h. After cooling to room temperature, the reaction mixture was extracted with ethyl acetate and brine, and dried over anhydrous MgSO<sub>4</sub>. Then, the solvent was removed in vacuo, and the residue was purified by flash chromatography on silica gel (petroleum ether/EtOAc= 15:1) to provide target product (**4**, 121.6 mg) in 82% yield.

## 3. The mechanism experiment

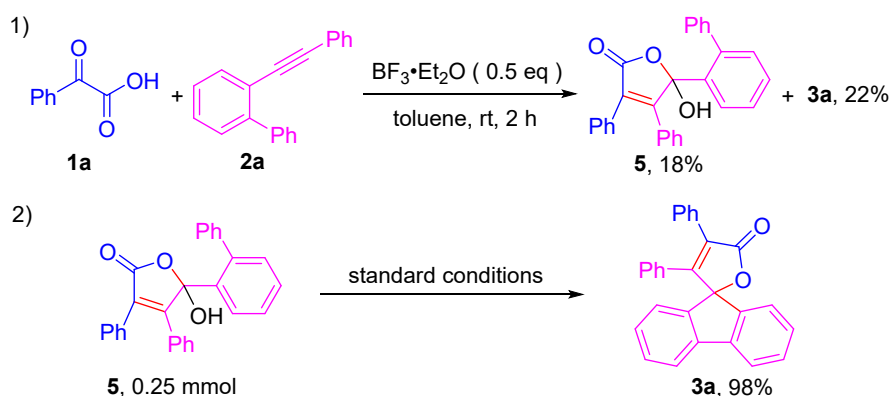

### 3.1 General procedure for the synthesis of **5**

A Schlenk tube (10 mL) equipped with magnetic stir bar was charged with 2-Oxo-2-phenylacetic acid (**1a**, 60.1 mg, 0.40 mmol), 2-(phenylethynyl)-1,1'-biphenyl (**2a**, 63.6 mg, 0.25 mmol), BF<sub>3</sub>·Et<sub>2</sub>O (18.0 mg, 0.125 mmol) and toluene (2 mL). Then, the mixture was stirred at room temperature for 2 h. After the reaction was completed, the

solvent was removed in vacuo, and the resulting crude mixture was purified by flash chromatography on silica gel (petroleum ether/EtOAc= 9:1) to provide compound **5** (18.2 mg) in 18% yield and the product **3a** (21.3 mg) in 22% yield.

### **3.2 General procedure for the transformation of 5 to 3a**

A Schlenk tube (10 mL) equipped with magnetic stir bar was charged with compound **5** (101.0 mg, 0.25 mmol),  $\text{BF}_3 \cdot \text{Et}_2\text{O}$  (71.0 mg, 0.50 mmol) and toluene (2 mL). Then, the mixture was stirred at room temperature for 2 h. After the reaction was completed, the solvent was removed in vacuo, and the resulting crude mixture was purified by flash chromatography on silica gel (petroleum ether/EtOAc= 9:1) to provide product **3a** (94.7 mg) in 98% yield.

## **4. X-ray structural analysis of 3a and 5**

In order to determine the absolute configuration of product **3** and **5**, the single crystals of **3a** and **5** were cultured in 25 mL vials by slow evaporation technique. The purified product **3a** (20 mg) and **5** (20 mg) were dissolved in a mixed solvent of  $\text{CH}_2\text{Cl}_2$  and petroleum ether (1/1) at room temperature, respectively. After a few days, the crystals of **3a** and **5** appeared and were collected for X-ray diffraction analysis. The crystal structure was determined by Bruker D8 QUESTX-ray single crystal diffractometer. The CCDC number of **3a** is 2190445, and **5** is 2194522.



---

The following ALERTS were generated. Each ALERT has the format  
**test-name\_ALERT\_alert-type\_alert-level.**  
Click on the hyperlinks for more details of the test.

---

**Alert level B**

PLAT230\_ALERT\_2\_B Hirshfeld Test Diff for C12 --C13 . 7.9 s.u.

---

**Alert level C**

PLAT230\_ALERT\_2\_C Hirshfeld Test Diff for C7 --C8 . 5.3 s.u.

---

**Alert level G**

FORMU01\_ALERT\_1\_G There is a discrepancy between the atom counts in the  
\_chemical\_formula\_sum and \_chemical\_formula\_moiety. This is  
usually due to the moiety formula being in the wrong format.  
Atom count from \_chemical\_formula\_sum: C1.84 H1.18 O0.13  
Atom count from \_chemical\_formula\_moiety:C1.96 H1.26 O0.14

CELLZ01\_ALERT\_1\_G Difference between formula and atom\_site contents detected.  
CELLZ01\_ALERT\_1\_G ALERT: check formula stoichiometry or atom site occupancies.  
From the CIF: \_cell\_formula\_units\_Z 61  
From the CIF: \_chemical\_formula\_sum C1.84 H1.18 O0.13  
TEST: Compare cell contents of formula and atom\_site data

| atom | Z*formula | cif sites | diff  |
|------|-----------|-----------|-------|
| C    | 112.24    | 112.00    | 0.24  |
| H    | 71.98     | 72.00     | -0.02 |
| O    | 7.93      | 8.00      | -0.07 |

|                                                                    |              |
|--------------------------------------------------------------------|--------------|
| PLAT042_ALERT_1_G Calc. and Reported Moiety Formula Strings Differ | Please Check |
| PLAT045_ALERT_1_G Calculated and Reported Z Differ by a Factor ... | 0.07 Check   |
| PLAT072_ALERT_2_G SHELXL First Parameter in WGHT Unusually Large   | 0.10 Report  |
| PLAT199_ALERT_1_G Reported _cell_measurement_temperature ..... (K) | 273 Check    |
| PLAT200_ALERT_1_G Reported _diffrn_ambient_temperature ..... (K)   | 273 Check    |
| PLAT398_ALERT_2_G Deviating C-O-C Angle From 120 for O1            | 109.7 Degree |
| PLAT933_ALERT_2_G Number of OMIT Records in Embedded .res File ... | 3 Note       |

---

0 **ALERT level A** = Most likely a serious problem - resolve or explain  
1 **ALERT level B** = A potentially serious problem, consider carefully  
1 **ALERT level C** = Check. Ensure it is not caused by an omission or oversight  
10 **ALERT level G** = General information/check it is not something unexpected

7 ALERT type 1 CIF construction/syntax error, inconsistent or missing data  
5 ALERT type 2 Indicator that the structure model may be wrong or deficient  
0 ALERT type 3 Indicator that the structure quality may be low  
0 ALERT type 4 Improvement, methodology, query or suggestion  
0 ALERT type 5 Informative message, check

---

It is advisable to attempt to resolve as many as possible of the alerts in all categories. Often the minor alerts point to easily fixed oversights, errors and omissions in your CIF or refinement strategy, so attention to these fine details can be worthwhile. In order to resolve some of the more serious problems it may be necessary to carry out additional measurements or structure refinements. However, the purpose of your study may justify the reported deviations and the more serious of these should normally be commented upon in the discussion or experimental section of a paper or in the "special\_details" fields of the CIF. checkCIF was carefully designed to identify outliers and unusual parameters, but every test has its limitations and alerts that are not important in a particular case may appear. Conversely, the absence of alerts does not guarantee there are no aspects of the results needing attention. It is up to the individual to critically assess their own results and, if necessary, seek expert advice.

### Publication of your CIF in IUCr journals

A basic structural check has been run on your CIF. These basic checks will be run on all CIFs submitted for publication in IUCr journals (*Acta Crystallographica*, *Journal of Applied Crystallography*, *Journal of Synchrotron Radiation*); however, if you intend to submit to *Acta Crystallographica Section C* or *E* or *IUCrData*, you should make sure that full publication checks are run on the final version of your CIF prior to submission.

### Publication of your CIF in other journals

Please refer to the *Notes for Authors* of the relevant journal for any special instructions relating to CIF submission.

---

PLATON version of 13/07/2021; check.def file version of 13/07/2021

Datablock 1 - ellipsoid plot

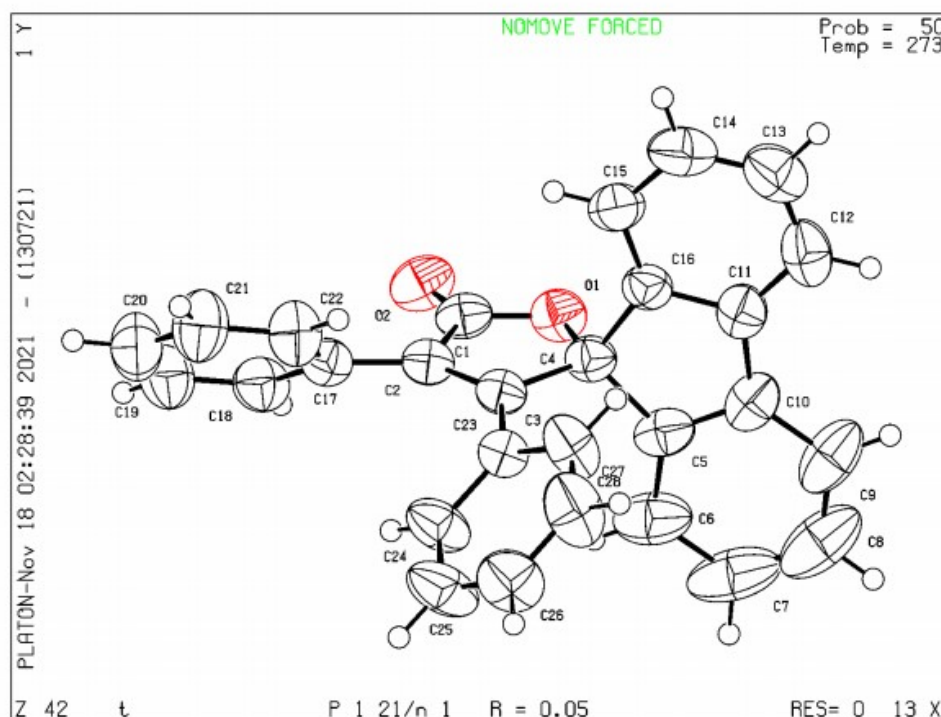





---

The following ALERTS were generated. Each ALERT has the format  
**test-name\_ALERT\_alert-type\_alert-level.**  
Click on the hyperlinks for more details of the test.

---

**Alert level B**

PLAT601\_ALERT\_2\_B Unit Cell Contains Solvent Accessible VOIDS of . 110 Ang\*\*3

---

**Alert level C**

PLAT052\_ALERT\_1\_C Info on Absorption Correction Method Not Given Please Do !  
PLAT230\_ALERT\_2\_C Hirshfeld Test Diff for C8 --C15 . 5.5 s.u.  
PLAT230\_ALERT\_2\_C Hirshfeld Test Diff for O5 --C36 . 5.1 s.u.  
PLAT906\_ALERT\_3\_C Large K Value in the Analysis of Variance ..... 11.206 Check  
PLAT906\_ALERT\_3\_C Large K Value in the Analysis of Variance ..... 2.257 Check  
PLAT910\_ALERT\_3\_C Missing # of FCF Reflection(s) Below Theta(Min). 10 Note  
PLAT911\_ALERT\_3\_C Missing FCF Refl Between Thmin & STh/L= 0.595 49 Report

---

**Alert level G**

PLAT007\_ALERT\_5\_G Number of Unrefined Donor-H Atoms ..... 2 Report  
PLAT045\_ALERT\_1\_G Calculated and Reported Z Differ by a Factor ... 2 Check  
PLAT154\_ALERT\_1\_G The s.u.'s on the Cell Angles are Equal ..(Note) 0.002 Degree  
PLAT398\_ALERT\_2\_G Deviating C-O-C Angle From 120 for O2 . 109.4 Degree  
PLAT398\_ALERT\_2\_G Deviating C-O-C Angle From 120 for O5 . 109.2 Degree  
PLAT793\_ALERT\_4\_G Model has Chirality at C16 (Centro SPGR) R Verify  
PLAT793\_ALERT\_4\_G Model has Chirality at C44 (Centro SPGR) R Verify  
PLAT883\_ALERT\_1\_G No Info/Value for \_atom\_sites\_solution\_primary . Please Do !  
PLAT933\_ALERT\_2\_G Number of HKL-OMIT Records in Embedded .res File 17 Note  
PLAT941\_ALERT\_3\_G Average HKL Measurement Multiplicity ..... 1.5 Low  
PLAT961\_ALERT\_5\_G Dataset Contains no Negative Intensities ..... Please Check  
PLAT965\_ALERT\_2\_G The SHELXL WEIGHT Optimisation has not Converged Please Check  
PLAT967\_ALERT\_5\_G Note: Two-Theta Cutoff Value in Embedded .res .. 50.0 Degree  
PLAT978\_ALERT\_2\_G Number C-C Bonds with Positive Residual Density. 1 Info

---

0 **ALERT level A** = Most likely a serious problem - resolve or explain  
1 **ALERT level B** = A potentially serious problem, consider carefully  
7 **ALERT level C** = Check. Ensure it is not caused by an omission or oversight  
14 **ALERT level G** = General information/check it is not something unexpected

4 ALERT type 1 CIF construction/syntax error, inconsistent or missing data  
8 ALERT type 2 Indicator that the structure model may be wrong or deficient  
5 ALERT type 3 Indicator that the structure quality may be low  
2 ALERT type 4 Improvement, methodology, query or suggestion  
3 ALERT type 5 Informative message, check

---

It is advisable to attempt to resolve as many as possible of the alerts in all categories. Often the minor alerts point to easily fixed oversights, errors and omissions in your CIF or refinement strategy, so attention to these fine details can be worthwhile. In order to resolve some of the more serious problems it may be necessary to carry out additional measurements or structure refinements. However, the purpose of your study may justify the reported deviations and the more serious of these should normally be commented upon in the discussion or experimental section of a paper or in the "special\_details" fields of the CIF. checkCIF was carefully designed to identify outliers and unusual parameters, but every test has its limitations and alerts that are not important in a particular case may appear. Conversely, the absence of alerts does not guarantee there are no aspects of the results needing attention. It is up to the individual to critically assess their own results and, if necessary, seek expert advice.

### Publication of your CIF in IUCr journals

A basic structural check has been run on your CIF. These basic checks will be run on all CIFs submitted for publication in IUCr journals (*Acta Crystallographica*, *Journal of Applied Crystallography*, *Journal of Synchrotron Radiation*); however, if you intend to submit to *Acta Crystallographica Section C* or *E* or *IUCrData*, you should make sure that full publication checks are run on the final version of your CIF prior to submission.

### Publication of your CIF in other journals

Please refer to the *Notes for Authors* of the relevant journal for any special instructions relating to CIF submission.

---

PLATON version of 18/05/2022; check.def file version of 17/05/2022

Datablock 2 - ellipsoid plot

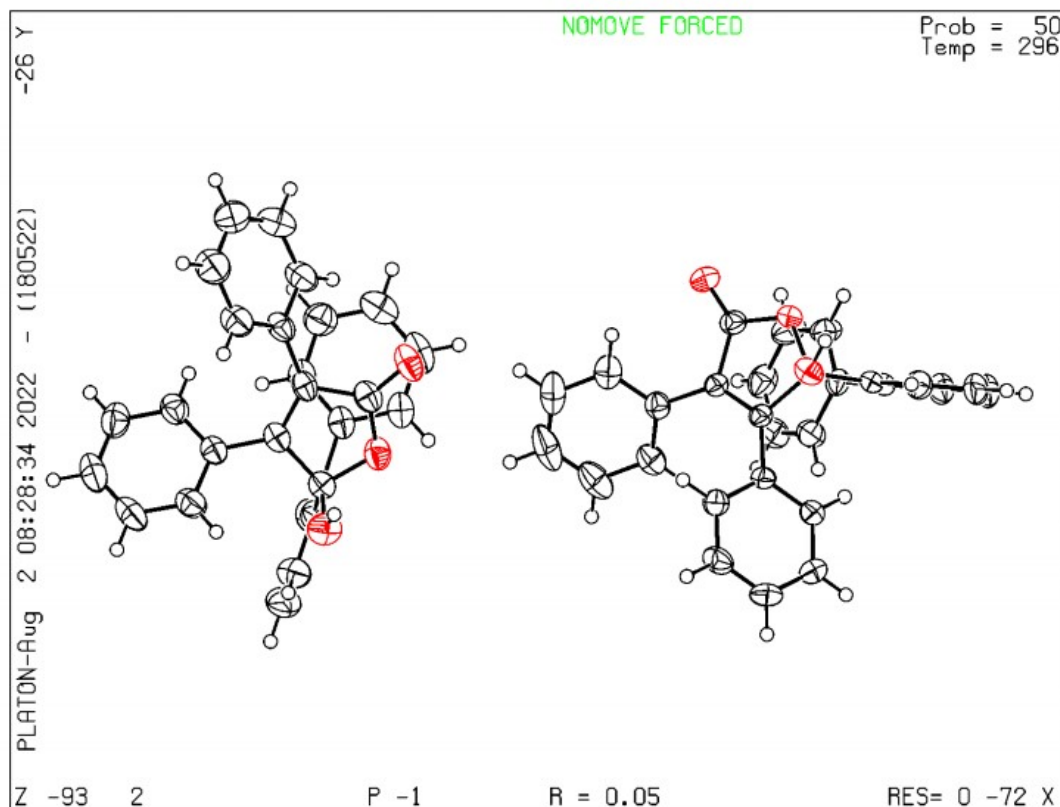

## 5. Characterization data for *o*-alkynyl biaryls (**2**) and all products

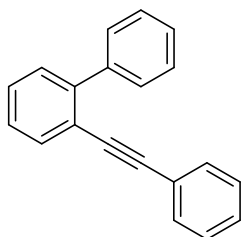

**2-(Phenylethynyl)-1,1'-biphenyl (2a).** Following the general procedure for the synthesis of **2**, the crude product was purified by silica gel column chromatography (eluent: petroleum ether) to afford an orange liquid (1.10 g, 86% yield);  $^1\text{H}$  NMR (600 MHz,  $\text{CDCl}_3$ ):  $\delta$  7.67–7.66 (m, 2H), 7.65–7.64 (m, 1H), 7.45 (t,  $J = 7.8$  Hz, 2H), 7.43–7.41 (m, 1H), 7.39–7.37 (m, 2H), 7.33–7.30 (m, 3H), 7.27–7.26 (m, 3H);  $^{13}\text{C}\{^1\text{H}\}$  NMR (150 MHz,  $\text{CDCl}_3$ ):  $\delta$  143.9, 140.5, 132.8, 131.3, 129.5, 129.4, 128.5, 128.2, 128.1, 127.9, 127.4, 127.0, 123.4, 121.6, 92.2, 89.4. HRMS (ESI)  $m/z$ :  $[\text{M} + \text{H}]^+$  calcd for  $\text{C}_{20}\text{H}_{15}$ , 255.1168; found, 255.1168.

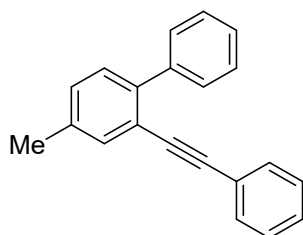

**4-Methyl-2-(phenylethynyl)-1,1'-biphenyl (2b).** Following the general procedure for the synthesis of **2**, the crude product was purified by silica gel column chromatography (eluent: petroleum ether) to afford a yellow liquid (1.13 g, 84% yield);  $^1\text{H}$  NMR (600 MHz,  $\text{CDCl}_3$ ):  $\delta$  7.65 (d,  $J = 7.2$  Hz, 2H), 7.47 (s, 1H), 7.43 (t,  $J = 7.8$  Hz, 2H), 7.36 (t,  $J = 7.2$  Hz, 1H), 7.33–7.31 (m, 3H), 7.28–7.26 (m, 3H), 7.20 (d,  $J = 7.8$  Hz, 1H), 2.38 (s, 3H);  $^{13}\text{C}\{^1\text{H}\}$  NMR (150 MHz,  $\text{CDCl}_3$ ):  $\delta$  141.1, 140.5, 136.8, 133.3, 131.3, 129.5, 129.4, 128.2, 128.0, 127.8, 127.2, 123.5, 121.3, 91.8, 89.6, 20.8. HRMS (ESI)  $m/z$ :  $[\text{M} + \text{H}]^+$  calcd for  $\text{C}_{21}\text{H}_{17}^+$ , 269.1325; found, 269.1329.

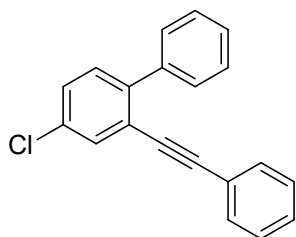

**4-Chloro-2-(phenylethynyl)-1,1'-biphenyl (2c).** Following the general procedure for the synthesis of **2**, the crude product was purified by silica gel column chromatography (eluent: petroleum ether) to afford an orange liquid (1.17 g, 81% yield);  $^1\text{H}$  NMR (600 MHz,  $\text{CDCl}_3$ ):  $\delta$  7.62–7.61 (m, 3H), 7.44 (t,  $J = 7.5$  Hz, 2H), 7.40–7.37 (m, 1H), 7.35–7.34 (m, 2H), 7.32–7.30 (m, 2H), 7.29–7.26 (m, 3H);  $^{13}\text{C}\{^1\text{H}\}$  NMR (150 MHz,  $\text{CDCl}_3$ ):  $\delta$  142.3, 139.4, 132.8, 132.3, 131.4, 130.6, 129.2, 128.6, 128.4, 128.3, 128.0, 127.7, 123.2, 122.9, 93.2, 88.1. HRMS (ESI)  $m/z$ :  $[\text{M} + \text{H}]^+$  calcd for  $\text{C}_{20}\text{H}_{14}\text{Cl}^+$ , 289.0779; found, 289.0776.

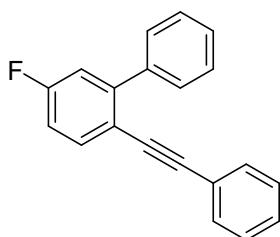

**4-Fluoro-2-(phenylethynyl)-1,1'-biphenyl (2d).** Following the general procedure for the synthesis of **2**, the crude product was purified by silica gel column chromatography (eluent: petroleum ether) to afford an orange liquid (1.06 g, 78% yield);  $^1\text{H}$  NMR (600 MHz,  $\text{CDCl}_3$ ):  $\delta$  7.66–7.64 (m, 2H), 7.62–7.60 (m, 1H), 7.46 (t,  $J = 7.5$  Hz, 2H), 7.40 (t,  $J = 7.5$  Hz, 1H), 7.31–7.26 (m, 5H), 7.15–7.12 (m, 1H), 7.04–7.01 (m, 1H);  $^{13}\text{C}\{^1\text{H}\}$  NMR (150 MHz,  $\text{CDCl}_3$ ):  $\delta$  162.4 (C–F,  $1J_{\text{C-F}} = 248.7$  Hz), 146.1 (C–F,  $3J_{\text{C-F}} = 8.3$  Hz), 139.5, 134.6 (C–F,  $3J_{\text{C-F}} = 8.4$  Hz), 131.3, 129.2, 128.3, 128.1, 128.01, 127.97, 123.3, 117.7 (C–F,  $4J_{\text{C-F}} = 3.2$  Hz), 116.5 (C–F,  $2J_{\text{C-F}} = 22.7$  Hz), 114.3 (C–F,  $2J_{\text{C-F}} = 21.8$  Hz), 91.8, 88.4;  $^{19}\text{F}\{^1\text{H}\}$  NMR (565 MHz,  $\text{CDCl}_3$ ):  $\delta$  –111.0. HRMS (ESI)  $m/z$ :  $[\text{M} + \text{H}]^+$  calcd for  $\text{C}_{20}\text{H}_{14}\text{F}^+$ , 273.1074; found, 273.1075.

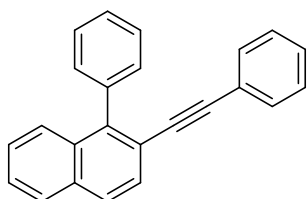

**1-Phenyl-2-(phenylethynyl)naphthalene (2e).** Following the general procedure for the synthesis of **2**, the crude product was purified by silica gel column chromatography (eluent: petroleum ether) to afford a yellow liquid (1.22 g, 80% yield);  $^1\text{H}$  NMR (600 MHz,  $\text{CDCl}_3$ ):  $\delta$  7.84 (d,  $J = 8.4$  Hz, 1H), 7.81 (d,  $J = 9.0$  Hz, 1H), 7.66 (t,  $J = 9.0$  Hz, 2H), 7.53–7.45 (m, 6H), 7.38 (t,  $J = 7.5$  Hz, 1H), 7.23–7.21 (m, 3H), 7.18–7.16 (m, 2H);  $^{13}\text{C}\{^1\text{H}\}$  NMR (150 MHz,  $\text{CDCl}_3$ ):  $\delta$  143.1, 138.9, 133.1, 132.2, 131.4, 130.7, 128.3, 128.2, 128.00, 127.98, 127.9, 127.5, 126.7, 126.5, 126.3, 123.4, 120.1, 93.2, 90.0. HRMS (ESI)  $m/z$ :  $[\text{M} + \text{H}]^+$  calcd for  $\text{C}_{24}\text{H}_{17}^+$ , 305.1325; found, 305.1322.

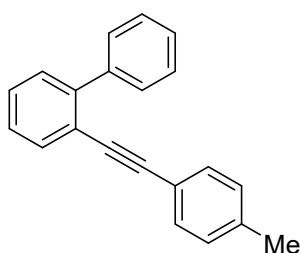

**2-(p-Tolylethynyl)-1,1'-biphenyl (2f).** Following the general procedure for the synthesis of **2**, the crude product was purified by silica gel column chromatography (eluent: petroleum ether) to afford an orange liquid (1.13 g, 84% yield);  $^1\text{H}$  NMR (600 MHz,  $\text{CDCl}_3$ ):  $\delta$  7.67–7.66 (m, 2H), 7.63–7.62 (m, 1H), 7.44 (t,  $J = 7.5$  Hz, 2H), 7.42–7.41 (m, 1H), 7.38–7.35 (m, 2H), 7.32–7.30 (m, 1H), 7.22 (d,  $J = 8.4$  Hz, 2H), 7.08 (d,  $J = 7.8$  Hz, 2H), 2.32 (s, 3H);  $^{13}\text{C}\{^1\text{H}\}$  NMR (150 MHz,  $\text{CDCl}_3$ ):  $\delta$  143.8, 140.6, 138.2, 132.7, 131.2, 129.42, 129.38, 129.0, 128.3, 127.8, 127.4, 127.0, 121.8, 120.4, 92.4, 88.7, 21.5. HRMS (ESI)  $m/z$ :  $[\text{M} + \text{H}]^+$  calcd for  $\text{C}_{21}\text{H}_{17}^+$ , 269.1325; found, 269.1328.

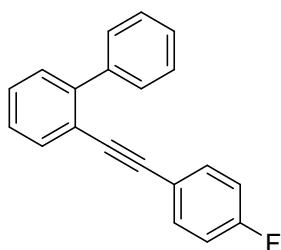

**2-((4-Fluorophenyl)ethynyl)-1,1'-biphenyl (2g).** Following the general procedure for the synthesis of **2**, the crude product was purified by silica gel column chromatography (eluent: petroleum ether) to afford a yellow liquid (1.12 g, 82%

yield);  $^1\text{H}$  NMR (600 MHz,  $\text{CDCl}_3$ ):  $\delta$  7.65–7.63 (m, 2H), 7.62 (d,  $J = 7.8$  Hz, 1H), 7.44 (t,  $J = 7.5$  Hz, 2H), 7.42–7.40 (m, 1H), 7.38 (t,  $J = 7.2$  Hz, 2H), 7.32–7.30 (m, 1H), 7.29–7.26 (m, 2H), 6.96 (t,  $J = 8.7$  Hz, 2H);  $^{13}\text{C}\{^1\text{H}\}$  NMR (150 MHz,  $\text{CDCl}_3$ ):  $\delta$  162.4 (C–F,  $1J_{\text{C-F}} = 248.0$  Hz), 143.9, 140.5, 133.2 (C–F,  $3J_{\text{C-F}} = 8.4$  Hz), 132.7, 129.5, 129.4, 128.5, 127.9, 127.5, 127.1, 121.4, 119.5 (C–F,  $4J_{\text{C-F}} = 3.3$  Hz), 115.5 (C–F,  $2J_{\text{C-F}} = 21.9$  Hz), 91.1, 89.0;  $^{19}\text{F}\{^1\text{H}\}$  NMR (565 MHz,  $\text{CDCl}_3$ ):  $\delta$  –111.0. HRMS (ESI)  $m/z$ :  $[\text{M} + \text{H}]^+$  calcd for  $\text{C}_{20}\text{H}_{14}\text{F}^+$ , 273.1074; found, 273.1076.

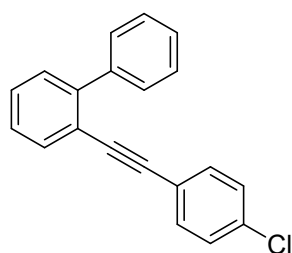

**2-((4-Chlorophenyl)ethynyl)-1,1'-biphenyl (2h).** Following the general procedure for the synthesis of **2**, the crude product was purified by silica gel column chromatography (eluent: petroleum ether) to afford a yellow liquid (1.17 g, 81% yield);  $^1\text{H}$  NMR (600 MHz,  $\text{CDCl}_3$ ):  $\delta$  7.63 (t,  $J = 7.2$  Hz, 3H), 7.45–7.41 (m, 3H), 7.40–7.37 (m, 2H), 7.33–7.30 (m, 1H), 7.24–7.21 (m, 4H);  $^{13}\text{C}\{^1\text{H}\}$  NMR (150 MHz,  $\text{CDCl}_3$ ):  $\delta$  144.0, 140.5, 134.1, 132.8, 132.5, 129.5, 129.3, 128.7, 128.6, 127.9, 127.5, 127.1, 121.9, 121.2, 91.0, 90.3. HRMS (ESI)  $m/z$ :  $[\text{M} + \text{H}]^+$  calcd for  $\text{C}_{20}\text{H}_{14}\text{Cl}^+$ , 289.0779; found, 289.0780.

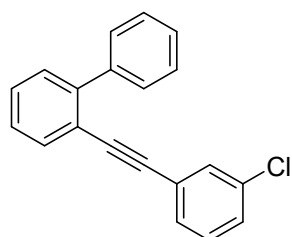

**2-((3-Chlorophenyl)ethynyl)-1,1'-biphenyl (2i).** Following the general procedure for the synthesis of **2**, the crude product was purified by silica gel column chromatography (eluent: petroleum ether) to afford an orange liquid (1.22 g, 85% yield);  $^1\text{H}$  NMR (600 MHz,  $\text{CDCl}_3$ ):  $\delta$  7.64–7.63 (m, 3H), 7.46 (t,  $J = 7.5$  Hz, 2H), 7.44–7.39 (m, 3H), 7.34–7.33 (m, 1H), 7.29 (s, 1H), 7.25–7.23 (m, 1H), 7.21–7.17 (m, 2H);  $^{13}\text{C}\{^1\text{H}\}$  NMR (150 MHz,  $\text{CDCl}_3$ ):  $\delta$  144.1, 140.4, 134.0, 132.9, 131.1,

129.5, 129.44, 129.43, 129.3, 128.9, 128.3, 127.9, 127.6, 127.1, 125.1, 121.1, 90.7, 90.6. HRMS (ESI)  $m/z$ :  $[M+H]^+$  calcd for  $C_{20}H_{14}Cl^+$ , 289.0779; found, 289.0782.

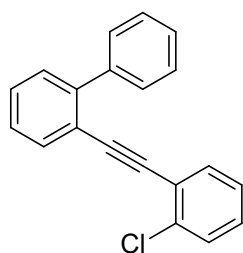

**2-((2-Chlorophenyl)ethynyl)-1,1'-biphenyl (2j).** Following the general procedure for the synthesis of **2**, the crude product was purified by silica gel column chromatography (eluent: petroleum ether) to afford a yellow liquid (1.15 g, 80% yield);  $^1H$  NMR (600 MHz,  $CDCl_3$ ):  $\delta$  7.71–7.69 (m, 1H), 7.68–7.66 (m, 2H), 7.45–7.40 (m, 4H), 7.39–7.37 (m, 1H), 7.36–7.31 (m, 3H), 7.20–7.17 (m, 1H), 7.16–7.13 (m, 1H);  $^{13}C\{^1H\}$  NMR (150 MHz,  $CDCl_3$ ):  $\delta$  143.9, 140.3, 135.7, 133.3, 133.2, 129.5, 129.4, 129.2, 129.1, 128.9, 128.0, 127.5, 127.0, 126.3, 123.4, 121.2, 94.3, 88.9. HRMS (ESI)  $m/z$ :  $[M+H]^+$  calcd for  $C_{20}H_{14}Cl^+$ , 289.0779; found, 289.0778.

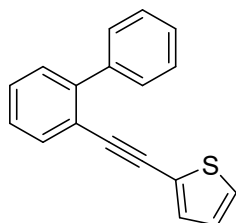

**2-([1,1'-Biphenyl]-2-ylethynyl)thiophene (2k).** Following the general procedure for the synthesis of **2**, the crude product was purified by silica gel column chromatography (eluent: petroleum ether) to afford an orange liquid (1.14 g, 88% yield);  $^1H$  NMR (600 MHz,  $CDCl_3$ ):  $\delta$  7.64–7.63 (m, 2H), 7.61–7.60 (m, 1H), 7.44 (t,  $J = 7.5$  Hz, 2H), 7.43–7.41 (m, 1H), 7.39–7.36 (m, 2H), 7.32–7.30 (m, 1H), 7.22–7.21 (m, 1H), 7.09–7.08 (m, 1H), 6.94–6.93 (m, 1H);  $^{13}C\{^1H\}$  NMR (150 MHz,  $CDCl_3$ ):  $\delta$  143.7, 140.3, 132.5, 131.5, 129.5, 129.3, 128.6, 127.9, 127.5, 127.1, 127.03, 126.97, 123.5, 121.3, 93.1, 85.6. HRMS (ESI)  $m/z$ :  $[M+H]^+$  calcd for  $C_{18}H_{13}S^+$ , 261.0732; found, 261.0731.



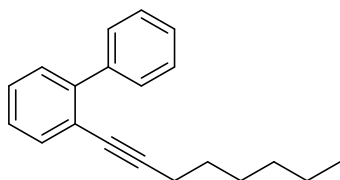

**2-(Oct-1-yn-1-yl)-1,1'-biphenyl (2l).** Following the general procedure for the synthesis of **2**, the crude product was purified by silica gel column chromatography (eluent: petroleum ether) to afford an orange liquid (0.98 g, 75% yield);  $^1\text{H}$  NMR (600 MHz,  $\text{CDCl}_3$ ):  $\delta$  7.59–7.58 (m, 2H), 7.51–7.50 (m, 1H), 7.39 (t,  $J = 7.5$  Hz, 2H), 7.35–7.30 (m, 3H), 7.26–7.24 (m, 1H), 2.28 (t,  $J = 7.2$  Hz, 2H), 1.48–1.43 (m, 2H), 1.31–1.25 (m, 4H), 1.24–1.19 (m, 2H), 0.88 (t,  $J = 7.2$  Hz, 3H);  $^{13}\text{C}\{^1\text{H}\}$  NMR (150 MHz,  $\text{CDCl}_3$ ):  $\delta$  143.6, 140.8, 133.0, 129.4, 129.3, 127.7, 127.6, 127.1, 126.9, 122.4, 93.5, 80.1, 31.4, 28.5, 28.4, 22.5, 19.5, 14.1. HRMS (ESI)  $m/z$ :  $[\text{M}+\text{H}]^+$  calcd for  $\text{C}_{20}\text{H}_{23}^+$ , 263.1794; found, 263.1795.

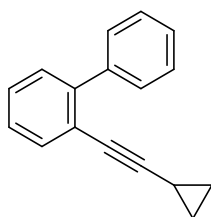

**2-(Cyclopropylethynyl)-1,1'-biphenyl (2m).** Following the general procedure for the synthesis of **2**, the crude product was purified by silica gel column chromatography (eluent: petroleum ether) to afford a yellow liquid (0.90 g, 82% yield);  $^1\text{H}$  NMR (600 MHz,  $\text{CDCl}_3$ ):  $\delta$  7.55 (d,  $J = 7.8$  Hz, 2H), 7.48 (d,  $J = 7.8$  Hz, 1H), 7.39 (t,  $J = 7.5$  Hz, 2H), 7.34–7.32 (m, 2H), 7.30–7.28 (m, 1H), 7.24–7.21 (m, 1H), 1.32–1.28 (m, 1H), 0.75–0.72 (m, 2H), 0.62–0.59 (m, 2H);  $^{13}\text{C}\{^1\text{H}\}$  NMR (150 MHz,  $\text{CDCl}_3$ ):  $\delta$  143.6, 140.7, 132.8, 129.3, 129.2, 127.7, 127.6, 127.2, 126.9, 122.2, 96.4, 75.2, 8.3, 0.3. HRMS (ESI)  $m/z$ :  $[\text{M}+\text{H}]^+$  calcd for  $\text{C}_{17}\text{H}_{15}^+$ , 219.1168; found, 219.1167.

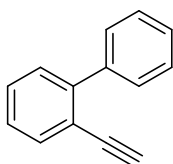

**2-Ethynyl-1,1'-biphenyl (2n).** Following the general procedure for the synthesis of **2**, the crude product was purified by silica gel column chromatography (eluent: petroleum ether) to afford a yellow liquid (0.72 g, 81% yield);  $^1\text{H}$  NMR (600 MHz,

CDCl<sub>3</sub>):  $\delta$  7.62–7.61 (m, 1H), 7.60–7.58 (m, 2H), 7.44–7.41 (m, 2H), 7.40–7.39 (m, 1H), 7.38–7.36 (m, 2H), 7.31–7.28 (m, 1H), 3.04 (s, 1H); <sup>13</sup>C{<sup>1</sup>H} NMR (150 MHz, CDCl<sub>3</sub>):  $\delta$  144.4, 140.2, 133.8, 129.6, 129.2, 128.9, 128.0, 127.5, 127.0, 120.4, 83.1, 80.1. HRMS (ESI) m/z: [M+H]<sup>+</sup> calcd for C<sub>14</sub>H<sub>11</sub><sup>+</sup>, 179.0855; found, 179.0857.

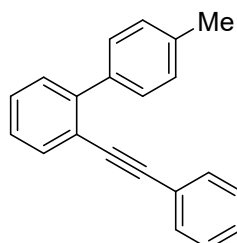

**4'-Methyl-2-(phenylethynyl)-1,1'-biphenyl (2o).** Following the general procedure for the synthesis of **2**, the crude product was purified by silica gel column chromatography (eluent: petroleum ether) to afford a yellow liquid (1.12 g, 83% yield); <sup>1</sup>H NMR (600 MHz, CDCl<sub>3</sub>):  $\delta$  7.63 (d, *J* = 7.8 Hz, 1H), 7.58–7.57 (m, 2H), 7.40 (d, *J* = 7.8 Hz, 1H), 7.37–7.34 (m, 3H), 7.30–7.24 (m, 6H), 2.41 (s, 3H); <sup>13</sup>C{<sup>1</sup>H} NMR (150 MHz, CDCl<sub>3</sub>):  $\delta$  143.7, 137.6, 137.1, 132.9, 131.3, 129.4, 129.2, 128.6, 128.5, 128.2, 128.0, 126.8, 123.5, 121.4, 92.1, 89.5, 21.2. HRMS (ESI) m/z: [M+H]<sup>+</sup> calcd for C<sub>21</sub>H<sub>17</sub><sup>+</sup>, 269.1325; found, 169.1323.

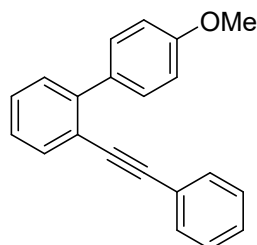

**4'-Methoxy-2-(phenylethynyl)-1,1'-biphenyl (2p).** Following the general procedure for the synthesis of **2**, the crude product was purified by silica gel column chromatography (eluent: petroleum ether) to afford an orange liquid (1.15 g, 81% yield); <sup>1</sup>H NMR (600 MHz, CDCl<sub>3</sub>):  $\delta$  7.63–7.61 (m, 3H), 7.40–7.39 (m, 1H), 7.37–7.35 (m, 3H), 7.30–7.27 (m, 4H), 6.99 (d, *J* = 9.0 Hz, 2H), 3.86 (s, 3H); <sup>13</sup>C{<sup>1</sup>H} NMR (150 MHz, CDCl<sub>3</sub>):  $\delta$  159.1, 143.4, 133.0, 132.9, 131.3, 130.5, 129.3, 128.5, 128.2, 128.0, 126.6, 123.5, 121.4, 113.3, 92.1, 89.6, 55.3. HRMS (ESI) m/z: [M+H]<sup>+</sup> calcd for C<sub>21</sub>H<sub>17</sub>O<sup>+</sup>, 285.1274; found, 285.1278.

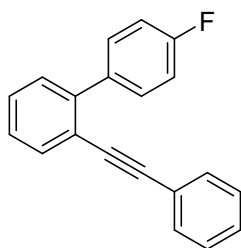

**4'-fluoro-2-(phenylethynyl)-1,1'-biphenyl (2q).** Following the general procedure for the synthesis of **2**, the crude product was purified by silica gel column chromatography (eluent: petroleum ether) to afford a yellow liquid (1.13 g, 83% yield);  $^1\text{H}$  NMR (600 MHz,  $\text{CDCl}_3$ ):  $\delta$  7.65–7.61 (m, 3H), 7.39 (d,  $J = 4.2$  Hz, 2H), 7.34–7.32 (m, 3H), 7.30–7.29 (m, 3H), 7.14 (t,  $J = 8.7$  Hz, 2H);  $^{13}\text{C}\{^1\text{H}\}$  NMR (150 MHz,  $\text{CDCl}_3$ ):  $\delta$  162.4 (C–F,  $1J_{\text{C-F}} = 245.0$  Hz), 142.8, 136.6 (C–F,  $4J_{\text{C-F}} = 3.3$  Hz), 132.9, 131.3, 131.0 (C–F,  $3J_{\text{C-F}} = 8.4$  Hz), 129.4, 128.6, 128.3, 128.2, 127.2, 123.3, 121.6, 114.8 (C–F,  $2J_{\text{C-F}} = 20.9$  Hz), 92.4, 89.1;  $^{19}\text{F}\{^1\text{H}\}$  NMR (565 MHz,  $\text{CDCl}_3$ ):  $\delta$  -115.1. HRMS (ESI)  $m/z$ :  $[\text{M}+\text{H}]^+$  calcd for  $\text{C}_{20}\text{H}_{14}\text{F}^+$ , 273.1074; found, 273.1076.

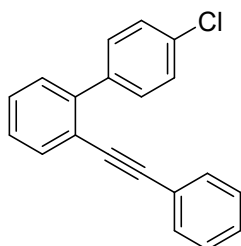

**4'-Chloro-2-(phenylethynyl)-1,1'-biphenyl (2r).** Following the general procedure for the synthesis of **2**, the crude product was purified by silica gel column chromatography (eluent: petroleum ether) to afford a yellow liquid (1.16 g, 80% yield);  $^1\text{H}$  NMR (600 MHz,  $\text{CDCl}_3$ ):  $\delta$  7.64 (d,  $J = 7.8$  Hz, 1H), 7.60 (d,  $J = 8.4$  Hz, 2H), 7.42 (d,  $J = 9.0$  Hz, 2H), 7.38–7.37 (m, 2H), 7.34–7.29 (m, 6H);  $^{13}\text{C}\{^1\text{H}\}$  NMR (150 MHz,  $\text{CDCl}_3$ ):  $\delta$  142.5, 139.0, 133.5, 133.0, 131.3, 130.7, 129.3, 128.6, 128.32, 128.26, 128.1, 127.4, 123.2, 121.5, 92.5, 88.9. HRMS (ESI)  $m/z$ :  $[\text{M}+\text{H}]^+$  calcd for  $\text{C}_{20}\text{H}_{14}\text{Cl}^+$ , 289.0779; found, 289.0784.

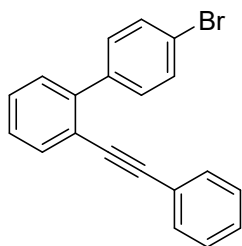

**4'-Bromo-2-(phenylethynyl)-1,1'-biphenyl (2s).** Following the general procedure for the synthesis of **2**, the crude product was purified by silica gel column chromatography (eluent: petroleum ether) to afford a yellow liquid (1.26 g, 76% yield);  $^1\text{H}$  NMR (600 MHz,  $\text{CDCl}_3$ ):  $\delta$  7.64–7.62 (m, 1H), 7.57–7.56 (m, 2H), 7.54–7.52 (m, 2H), 7.37–7.36 (m, 3H), 7.34–7.31 (m, 3H), 7.30–7.28 (m, 2H);  $^{13}\text{C}\{^1\text{H}\}$  NMR (150 MHz,  $\text{CDCl}_3$ ):  $\delta$  142.5, 139.4, 133.0, 131.3, 131.0, 129.2, 128.6, 128.32, 128.27, 127.4, 123.2, 121.7, 121.4, 92.6, 88.9.

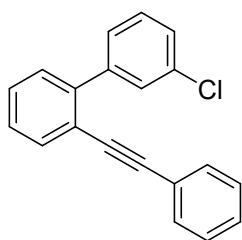

**3'-Chloro-2-(phenylethynyl)-1,1'-biphenyl (2t).** Following the general procedure for the synthesis of **2**, the crude product was purified by silica gel column chromatography (eluent: petroleum ether) to afford a yellow liquid (1.24 g, 86% yield);  $^1\text{H}$  NMR (600 MHz,  $\text{CDCl}_3$ ):  $\delta$  7.72 (s, 1H), 7.64 (d,  $J = 7.8$  Hz, 1H), 7.52–7.50 (m, 1H), 7.40–7.36 (m, 6H), 7.35–7.32 (m, 1H), 7.30–7.28 (m, 3H);  $^{13}\text{C}\{^1\text{H}\}$  NMR (150 MHz,  $\text{CDCl}_3$ ):  $\delta$  142.2, 133.7, 132.9, 131.4, 129.5, 129.3, 129.2, 128.6, 128.29, 128.26, 127.57, 127.55, 127.5, 123.2, 121.6, 92.8, 88.8. HRMS (ESI)  $m/z$ :  $[\text{M}+\text{H}]^+$  calcd for  $\text{C}_{20}\text{H}_{14}\text{Cl}^+$ , 289.0779; found, 289.0777.

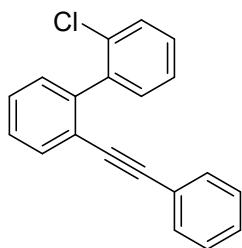

**2-Chloro-2'-(phenylethynyl)-1,1'-biphenyl (2u).** Following the general procedure

for the synthesis of **2**, the crude product was purified by silica gel column chromatography (eluent: petroleum ether) to afford an orange liquid (1.18 g, 82% yield);  $^1\text{H}$  NMR (600 MHz,  $\text{CDCl}_3$ ):  $\delta$  7.64–7.63 (m, 1H), 7.51–7.50 (m, 1H), 7.41–7.37 (m, 3H), 7.36–7.32 (m, 3H), 7.25–7.22 (m, 3H), 7.18–7.16 (m, 2H);  $^{13}\text{C}\{^1\text{H}\}$  NMR (150 MHz,  $\text{CDCl}_3$ ):  $\delta$  142.0, 139.6, 133.5, 131.8, 131.7, 131.4, 129.7, 129.4, 128.9, 128.2, 128.1, 127.9, 127.7, 126.2, 123.2, 123.0, 92.7, 88.4. HRMS (ESI)  $m/z$ :  $[\text{M}+\text{H}]^+$  calcd for  $\text{C}_{20}\text{H}_{14}\text{Cl}^+$ , 289.0779; found, 289.0778.

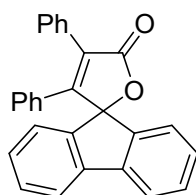

**3',4'-Diphenyl-5'*H*-spiro[fluorene-9,2'-furan]-5'-one (3a).** Following the general procedure for the synthesis of **3**, the crude product was purified by silica gel column chromatography (eluent: petroleum ether/EtOAc = 9:1) to afford a white solid (92.7 mg, 96% yield), mp 163.7–165.5 °C;  $^1\text{H}$  NMR (600 MHz,  $\text{CDCl}_3$ ):  $\delta$  7.57 (d,  $J$  = 7.8 Hz, 2H), 7.54–7.53 (m, 2H), 7.39–7.35 (m, 4H), 7.32–7.31 (m, 3H), 7.28–7.25 (m, 2H), 7.04 (t,  $J$  = 7.5 Hz, 1H), 6.92 (t,  $J$  = 7.8 Hz, 2H), 6.66–6.64 (m, 2H);  $^{13}\text{C}\{^1\text{H}\}$  NMR (150 MHz,  $\text{CDCl}_3$ ):  $\delta$  172.2, 160.3, 141.3, 140.7, 130.7, 130.4, 129.7, 129.4, 129.3, 128.8, 128.4, 128.2, 127.8, 127.7, 124.1, 120.6, 92.7. HRMS (ESI)  $m/z$ :  $[\text{M}+\text{H}]^+$  calcd for  $\text{C}_{28}\text{H}_{19}\text{O}_2^+$ , 387.1380; found, 387.1376.

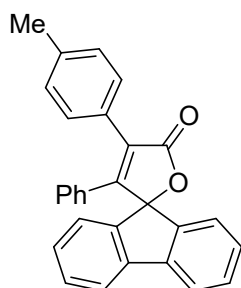

**3'-Phenyl-4'-(*p*-tolyl)-5'*H*-spiro[fluorene-9,2'-furan]-5'-one (3b).** Following the general procedure for the synthesis of **3**, the crude product was purified by silica gel column chromatography (eluent: petroleum ether/EtOAc = 9:1) to afford a white solid (94.1 mg, 94% yield), mp 193.2–194.8 °C;  $^1\text{H}$  NMR (600 MHz,  $\text{CDCl}_3$ ):  $\delta$  7.58 (d,  $J$  = 7.2 Hz, 2H), 7.43 (d,  $J$  = 7.8 Hz, 2H), 7.39–7.36 (m, 4H), 7.27 (t,  $J$  = 7.2 Hz, 2H),

7.12 (d,  $J = 7.8$  Hz, 2H), 7.05 (t,  $J = 7.5$  Hz, 1H), 6.94 (t,  $J = 7.8$  Hz, 2H), 6.66 (d,  $J = 7.2$  Hz, 2H), 2.33 (s, 3H);  $^{13}\text{C}\{^1\text{H}\}$  NMR (150 MHz,  $\text{CDCl}_3$ ):  $\delta$  172.4, 159.4, 141.3, 140.8, 138.8, 131.0, 130.4, 129.3, 129.2, 129.1, 128.4, 128.2, 127.74, 127.69, 126.8, 124.1, 120.6, 92.6, 21.3. HRMS (ESI)  $m/z$ :  $[\text{M}+\text{H}]^+$  calcd for  $\text{C}_{29}\text{H}_{21}\text{O}_2^+$ , 401.1536; found, 401.1534.

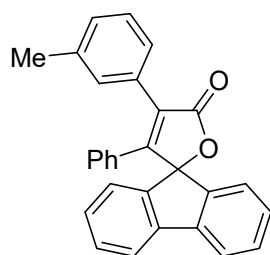

**3'-Phenyl-4'-(*m*-tolyl)-5'*H*-spiro[fluorene-9,2'-furan]-5'-one (3c).** Following the general procedure for the synthesis of **3**, the crude product was purified by silica gel column chromatography (eluent: petroleum ether/EtOAc = 9:1) to afford a white solid (82.1 mg, 82% yield), mp 156.4–157.8 °C;  $^1\text{H}$  NMR (600 MHz,  $\text{CDCl}_3$ ):  $\delta$  7.60 (d,  $J = 7.2$  Hz, 2H), 7.41–7.38 (m, 5H), 7.29–7.27 (m, 2H), 7.25–7.24 (m, 1H), 7.19 (t,  $J = 7.5$  Hz, 1H), 7.14 (d,  $J = 7.2$  Hz, 1H), 7.06 (t,  $J = 7.5$  Hz, 1H), 6.94 (t,  $J = 7.8$  Hz, 2H), 6.66 (d,  $J = 7.2$  Hz, 2H), 2.30 (s, 3H);  $^{13}\text{C}\{^1\text{H}\}$  NMR (150 MHz,  $\text{CDCl}_3$ ):  $\delta$  172.3, 160.0, 141.3, 140.8, 138.1, 130.9, 130.4, 130.0, 129.7, 129.6, 129.3, 128.4, 128.3, 128.2, 128.0, 126.6, 124.1, 92.6, 21.4. HRMS (ESI)  $m/z$ :  $[\text{M}+\text{H}]^+$  calcd for  $\text{C}_{29}\text{H}_{21}\text{O}_2^+$ , 401.1536; found, 401.1539.

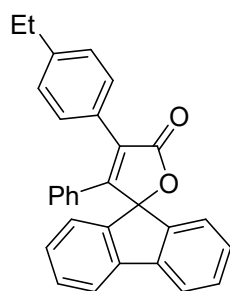

**4'-(4-Ethylphenyl)-3'-phenyl-5'*H*-spiro[fluorene-9,2'-furan]-5'-one (3d).** Following the general procedure for the synthesis of **3**, the crude product was purified by silica gel column chromatography (eluent: petroleum ether/EtOAc = 9:1) to afford a white solid (93.3 mg, 90% yield), mp 180.5–181.3 °C;  $^1\text{H}$  NMR (600 MHz,  $\text{CDCl}_3$ ):  $\delta$  7.59 (d,  $J = 7.8$  Hz, 2H), 7.46 (d,  $J = 7.8$  Hz, 2H), 7.38 (t,  $J = 7.5$  Hz, 4H), 7.29–

7.27 (m, 2H), 7.16 (d,  $J = 8.4$  Hz, 2H), 7.07 (t,  $J = 7.5$  Hz, 1H), 6.95 (t,  $J = 7.8$  Hz, 2H), 6.66 (d,  $J = 8.4$  Hz, 2H), 2.64 (q,  $J = 7.6$  Hz, 2H), 1.22 (t,  $J = 7.5$  Hz, 3H);  $^{13}\text{C}\{^1\text{H}\}$  NMR (150 MHz,  $\text{CDCl}_3$ ):  $\delta$  172.4, 159.5, 145.1, 141.3, 140.8, 131.0, 130.4, 129.4, 129.2, 128.4, 128.3, 127.9, 127.8, 127.7, 127.0, 124.1, 120.6, 92.7, 28.7, 15.2. HRMS (ESI)  $m/z$ :  $[\text{M}+\text{H}]^+$  calcd for  $\text{C}_{30}\text{H}_{23}\text{O}_2^+$ , 415.1693; found, 415.1695.

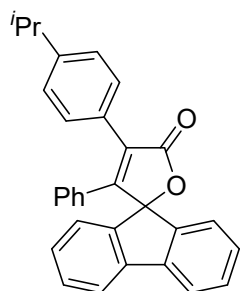

**4'-(4-Isopropylphenyl)-3'-phenyl-5'*H*-spiro[fluorene-9,2'-furan]-5'-one (3e).**

Following the general procedure for the synthesis of **3**, the crude product was purified by silica gel column chromatography (eluent: petroleum ether/EtOAc = 9:1) to afford a white solid (91.1 mg, 85% yield), mp 176.8–178.5 °C;  $^1\text{H}$  NMR (600 MHz,  $\text{CDCl}_3$ ):  $\delta$  7.59 (d,  $J = 7.8$  Hz, 2H), 7.49–7.47 (m, 2H), 7.38 (t,  $J = 7.5$  Hz, 4H), 7.28 (t,  $J = 7.5$  Hz, 2H), 7.18 (d,  $J = 7.8$  Hz, 2H), 7.07 (t,  $J = 7.5$  Hz, 1H), 6.95 (t,  $J = 7.8$  Hz, 2H), 6.67 (d,  $J = 7.8$  Hz, 2H), 2.91–2.87 (m, 1H), 1.23 (d,  $J = 7.2$  Hz, 6H);  $^{13}\text{C}\{^1\text{H}\}$  NMR (150 MHz,  $\text{CDCl}_3$ ):  $\delta$  172.5, 159.5, 149.7, 141.3, 140.8, 131.1, 130.4, 129.4, 129.2, 128.4, 128.3, 127.8, 127.6, 127.1, 126.5, 124.1, 120.6, 92.7, 33.9, 23.8. HRMS (ESI)  $m/z$ :  $[\text{M}+\text{H}]^+$  calcd for  $\text{C}_{31}\text{H}_{25}\text{O}_2^+$ , 429.1849; found, 429.1849.

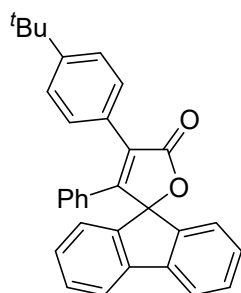

**4'-(4-(*tert*-Butyl)phenyl)-3'-phenyl-5'*H*-spiro[fluorene-9,2'-furan]-5'-one (3f).**

Following the general procedure for the synthesis of **3**, the crude product was purified by silica gel column chromatography (eluent: petroleum ether/EtOAc = 9:1) to afford a white solid (95.1 mg, 86% yield), mp 209.2–210.6 °C;  $^1\text{H}$  NMR (600 MHz,  $\text{CDCl}_3$ ):

$\delta$  7.59 (d,  $J = 7.8$  Hz, 2H), 7.49 (d,  $J = 8.4$  Hz, 2H), 7.40–7.38 (m, 4H), 7.34 (d,  $J = 8.4$  Hz, 2H), 7.28 (t,  $J = 7.5$  Hz, 2H), 7.08 (t,  $J = 7.5$  Hz, 1H), 6.96 (t,  $J = 7.8$  Hz, 2H), 6.67 (d,  $J = 7.8$  Hz, 2H), 1.30 (s, 9H);  $^{13}\text{C}\{^1\text{H}\}$  NMR (150 MHz,  $\text{CDCl}_3$ ):  $\delta$  172.5, 159.5, 152.0, 141.3, 140.8, 131.1, 130.4, 129.2, 129.1, 128.4, 128.3, 127.8, 127.5, 126.7, 125.4, 124.2, 120.6, 92.7, 34.7, 31.2. HRMS (ESI)  $m/z$ :  $[\text{M}+\text{H}]^+$  calcd for  $\text{C}_{32}\text{H}_{27}\text{O}_2^+$ , 443.2006; found, 443.2009.

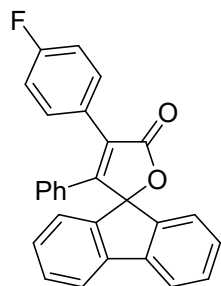

**4'-(4-Fluorophenyl)-3'-phenyl-5'*H*-spiro[fluorene-9,2'-furan]-5'-one (3g).**

Following the general procedure for the synthesis of **3**, the crude product was purified by silica gel column chromatography (eluent: petroleum ether/EtOAc = 9:1) to afford a white solid (96.1 mg, 95% yield), mp 195.9–197.5 °C;  $^1\text{H}$  NMR (600 MHz,  $\text{CDCl}_3$ ):  $\delta$  7.60–7.59 (m, 2H), 7.54–7.52 (m, 2H), 7.41–7.38 (m, 4H), 7.30–7.27 (m, 2H), 7.09 (t,  $J = 7.5$  Hz, 1H), 7.01 (t,  $J = 9.0$  Hz, 2H), 6.97 (t,  $J = 7.8$  Hz, 2H), 6.64–6.63 (m, 2H);  $^{13}\text{C}\{^1\text{H}\}$  NMR (150 MHz,  $\text{CDCl}_3$ ):  $\delta$  172.2, 162.8 (C–F,  $1J_{\text{C-F}} = 248.1$  Hz), 160.3, 141.3, 140.5, 131.4 (C–F,  $3J_{\text{C-F}} = 8.3$  Hz), 130.7, 130.5, 129.5, 128.4, 127.7, 126.7, 125.8 (C–F,  $4J_{\text{C-F}} = 3.2$  Hz), 124.1, 120.7, 115.5 (C–F,  $2J_{\text{C-F}} = 21.5$  Hz), 92.8;  $^{19}\text{F}\{^1\text{H}\}$  NMR (565 MHz,  $\text{CDCl}_3$ ):  $\delta$  -115.5. HRMS (ESI)  $m/z$ :  $[\text{M}+\text{H}]^+$  calcd for  $\text{C}_{28}\text{H}_{18}\text{FO}_2^+$ , 405.1285; found, 405.1286.

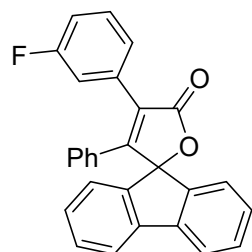

**4'-(3-Fluorophenyl)-3'-phenyl-5'*H*-spiro[fluorene-9,2'-furan]-5'-one (3h).**

Following the general procedure for the synthesis of **3**, the crude product was purified by silica gel column chromatography (eluent: petroleum ether/EtOAc = 9:1) to afford



a white solid (83.9 mg, 83% yield), mp 160.2–161.6 °C;  $^1\text{H}$  NMR (600 MHz,  $\text{CDCl}_3$ ):  $\delta$  7.59 (d,  $J = 7.8$  Hz, 2H), 7.39 (t,  $J = 6.6$  Hz, 4H), 7.31–7.25 (m, 5H), 7.09 (t,  $J = 7.5$  Hz, 1H), 7.04–7.01 (m, 1H), 6.97 (t,  $J = 7.8$  Hz, 2H), 6.64 (d,  $J = 7.2$  Hz, 2H);  $^{13}\text{C}\{^1\text{H}\}$  NMR (150 MHz,  $\text{CDCl}_3$ ):  $\delta$  171.8, 162.5 (C–F,  $1J_{\text{C-F}} = 244.8$  Hz), 161.6, 141.3, 140.4, 131.8 (C–F,  $3J_{\text{C-F}} = 8.4$  Hz), 130.6, 130.4, 130.0, 129.9 (C–F,  $3J_{\text{C-F}} = 8.6$  Hz), 128.4, 127.6, 126.6, 126.5, 125.2 (C–F,  $4J_{\text{C-F}} = 3.0$  Hz), 124.1, 120.7, 116.4 (C–F,  $2J_{\text{C-F}} = 22.8$  Hz), 115.8 (C–F,  $2J_{\text{C-F}} = 20.9$  Hz), 92.8;  $^{19}\text{F}\{^1\text{H}\}$  NMR (565 MHz,  $\text{CDCl}_3$ ):  $\delta$  -112.3. HRMS (ESI)  $m/z$ :  $[\text{M}+\text{H}]^+$  calcd for  $\text{C}_{28}\text{H}_{18}\text{FO}_2^+$ , 405.1285; found, 405.1285.

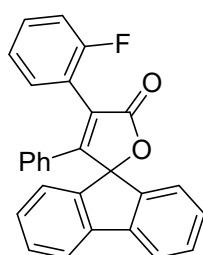

**4'-(2-Fluorophenyl)-3'-phenyl-5'H-spiro[fluorene-9,2'-furan]-5'-one (3i).**

Following the general procedure for the synthesis of **3**, the crude product was purified by silica gel column chromatography (eluent: petroleum ether/EtOAc = 9:1) to afford a white solid (91.0 mg, 90% yield), mp 176.7–178.3 °C;  $^1\text{H}$  NMR (600 MHz,  $\text{CDCl}_3$ ):  $\delta$  7.65 (d,  $J = 7.8$  Hz, 2H), 7.57–7.54 (m, 1H), 7.42–7.35 (m, 5H), 7.29 (t,  $J = 7.2$  Hz, 2H), 7.24–7.23 (m, 1H), 7.08–7.05 (m, 2H), 6.92 (t,  $J = 7.8$  Hz, 2H), 6.67 (d,  $J = 7.2$  Hz, 2H);  $^{13}\text{C}\{^1\text{H}\}$  NMR (150 MHz,  $\text{CDCl}_3$ ):  $\delta$  171.6, 162.5, 160.0 (C–F,  $1J_{\text{C-F}} = 249.0$  Hz), 141.3, 140.9, 131.61, 131.59, 130.9 (C–F,  $3J_{\text{C-F}} = 8.3$  Hz), 130.61, 130.59, 129.8, 128.6, 128.2, 127.3, 124.4 (C–F,  $4J_{\text{C-F}} = 3.3$  Hz), 124.2, 123.5, 120.7, 118.5 (C–F,  $2J_{\text{C-F}} = 15.2$  Hz), 116.0 (C–F,  $2J_{\text{C-F}} = 21.3$  Hz), 93.1;  $^{19}\text{F}\{^1\text{H}\}$  NMR (565 MHz,  $\text{CDCl}_3$ ):  $\delta$  -111.6. HRMS (ESI)  $m/z$ :  $[\text{M}+\text{H}]^+$  calcd for  $\text{C}_{28}\text{H}_{18}\text{FO}_2^+$ , 405.1285; found, 405.1286.

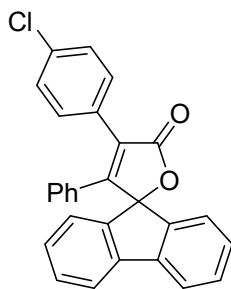

**4'-(4-Chlorophenyl)-3'-phenyl-5'*H*-spiro[fluorene-9,2'-furan]-5'-one (3j).**

Following the general procedure for the synthesis of **3**, the crude product was purified by silica gel column chromatography (eluent: petroleum ether/EtOAc = 9:1) to afford a white solid (89.4 mg, 85% yield), mp 186.4–188.1 °C; <sup>1</sup>H NMR (600 MHz, CDCl<sub>3</sub>): δ 7.60 (d, *J* = 7.2 Hz, 2H), 7.49 (dd, *J* = 1.8 Hz, 8.4 Hz, 2H), 7.39 (t, *J* = 8.1 Hz, 4H), 7.30–7.27 (m, 4H), 7.09 (t, *J* = 7.5 Hz, 1H), 6.97 (t, *J* = 8.1 Hz, 2H), 6.63 (d, *J* = 7.8 Hz, 2H); <sup>13</sup>C{<sup>1</sup>H} NMR (150 MHz, CDCl<sub>3</sub>): δ 172.0, 160.9, 141.3, 140.4, 134.9, 130.8, 130.6, 129.6, 128.7, 128.5, 128.4, 128.2, 127.6, 126.6, 124.1, 120.7, 92.8. HRMS (ESI) *m/z*: [M+H]<sup>+</sup> Calcd for C<sub>28</sub>H<sub>18</sub>ClO<sub>2</sub><sup>+</sup>, 421.0990; found, 421.0990.

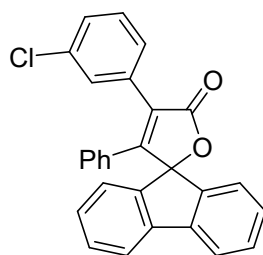

**4'-(3-Chlorophenyl)-3'-phenyl-5'*H*-spiro[fluorene-9,2'-furan]-5'-one (3k).**

Following the general procedure for the synthesis of **3**, the crude product was purified by silica gel column chromatography (eluent: petroleum ether/EtOAc = 9:1) to afford a white solid (92.6 mg, 88% yield), mp 176.1–177.5 °C; <sup>1</sup>H NMR (600 MHz, CDCl<sub>3</sub>): δ 7.61 (d, *J* = 7.8 Hz, 2H), 7.57 (s, 1H), 7.42–7.37 (m, 5H), 7.31–7.29 (m, 3H), 7.25 (t, *J* = 3.9 Hz, 1H), 7.10 (t, *J* = 7.5 Hz, 1H), 6.98 (t, *J* = 7.8 Hz, 2H), 6.64 (d, *J* = 7.2 Hz, 2H); <sup>13</sup>C{<sup>1</sup>H} NMR (150 MHz, CDCl<sub>3</sub>): δ 171.8, 161.7, 141.4, 140.4, 134.4, 131.6, 130.6, 130.3, 129.68, 129.67, 129.5, 129.0, 128.47, 128.45, 127.68, 127.66, 126.5, 124.1, 120.7, 92.8. HRMS (ESI) *m/z*: [M+H]<sup>+</sup> calcd for C<sub>28</sub>H<sub>18</sub>ClO<sub>2</sub><sup>+</sup>, 421.0990; found, 421.0992.

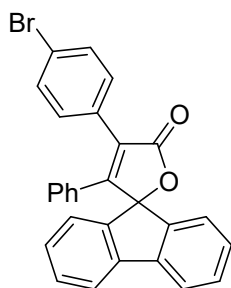

**4'-(4-Bromophenyl)-3'-phenyl-5'*H*-spiro[fluorene-9,2'-furan]-5'-one (3l).**

Following the general procedure for the synthesis of **3**, the crude product was purified by silica gel column chromatography (eluent: petroleum ether/EtOAc = 9:1) to afford a white solid (96.6 mg, 83% yield), mp 196.5–198.3 °C; <sup>1</sup>H NMR (600 MHz, CDCl<sub>3</sub>): δ 7.60 (d, *J* = 7.8 Hz, 2H), 7.45 (d, *J* = 9.0 Hz, 2H), 7.42–7.38 (m, 6H), 7.29 (t, *J* = 7.5 Hz, 2H), 7.10 (t, *J* = 7.5 Hz, 1H), 6.97 (t, *J* = 8.1 Hz, 2H), 6.64–6.62 (m, 2H); <sup>13</sup>C{<sup>1</sup>H} NMR (150 MHz, CDCl<sub>3</sub>): δ 171.9, 161.0, 141.3, 140.4, 131.7, 131.0, 130.6, 130.5, 129.6, 128.7, 128.5, 128.4, 127.6, 126.7, 124.1, 123.2, 120.7, 92.8. HRMS (ESI) *m/z*: [M+H]<sup>+</sup> calcd for C<sub>28</sub>H<sub>18</sub>BrO<sub>2</sub><sup>+</sup>, 465.0485; found, 465.0487.

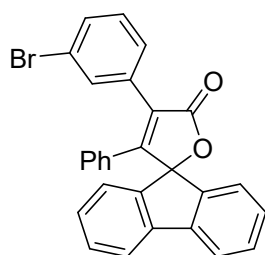

**4'-(3-Bromophenyl)-3'-phenyl-5'*H*-spiro[fluorene-9,2'-furan]-5'-one (3m).**

Following the general procedure for the synthesis of **3**, the crude product was purified by silica gel column chromatography (eluent: petroleum ether/EtOAc = 9:1) to afford a white solid (98.9 mg, 85% yield), mp 176.9–178.7 °C; <sup>1</sup>H NMR (600 MHz, CDCl<sub>3</sub>): δ 7.73–7.72 (m, 1H), 7.61 (d, *J* = 7.8 Hz, 2H), 7.47–7.45 (m, 1H), 7.42–7.38 (m, 5H), 7.31–7.29 (m, 2H), 7.18 (t, *J* = 8.1 Hz, 1H), 7.11 (t, *J* = 7.5 Hz, 1H), 6.98 (t, *J* = 7.8 Hz, 2H), 6.64 (d, *J* = 7.2 Hz, 2H); <sup>13</sup>C{<sup>1</sup>H} NMR (150 MHz, CDCl<sub>3</sub>): δ 171.7, 161.7, 141.4, 140.4, 132.3, 131.9, 131.8, 130.6, 130.3, 129.9, 129.7, 128.47, 128.46, 128.1, 127.7, 126.4, 124.1, 122.4, 120.7, 92.8. HRMS (ESI) *m/z*: [M+H]<sup>+</sup> calcd for C<sub>28</sub>H<sub>18</sub>BrO<sub>2</sub><sup>+</sup>, 465.0485; found, 465.0486.

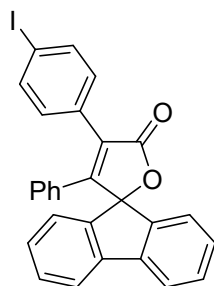

**4'-(4-Iodophenyl)-3'-phenyl-5'*H*-spiro[fluorene-9,2'-furan]-5'-one (3n).** Following the general procedure for the synthesis of **3**, the crude product was purified by silica gel column chromatography (eluent: petroleum ether/EtOAc = 9:1) to afford a yellow solid (103.8 mg, 81% yield), mp 220.6–222.2 °C; <sup>1</sup>H NMR (600 MHz, CDCl<sub>3</sub>): δ 7.66 (d, *J* = 8.4 Hz, 2H), 7.61 (d, *J* = 7.8 Hz, 2H), 7.41–7.37 (m, 4H), 7.30–7.27 (m, 4H), 7.10 (t, *J* = 7.5 Hz, 1H), 6.97 (t, *J* = 7.8 Hz, 2H), 6.63 (d, *J* = 7.2 Hz, 2H); <sup>13</sup>C{<sup>1</sup>H} NMR (150 MHz, CDCl<sub>3</sub>): δ 171.8, 161.1, 141.4, 140.4, 137.6, 131.1, 130.6, 129.6, 129.2, 128.5, 128.4, 127.6, 126.8, 124.1, 120.7, 95.2, 92.9. HRMS (ESI) *m/z*: [M+H]<sup>+</sup> calcd for C<sub>28</sub>H<sub>18</sub>IO<sub>2</sub><sup>+</sup>, 513.0346; found, 513.0346.

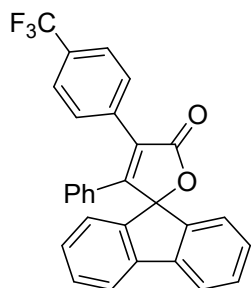

**3'-Phenyl-4'-(4-(trifluoromethyl)phenyl)-5'*H*-spiro[fluorene-9,2'-furan]-5'-one (3o).** Following the general procedure for the synthesis of **3**, the crude product was purified by silica gel column chromatography (eluent: petroleum ether/EtOAc = 9:1) to afford a white solid (90.9 mg, 80% yield), mp 176.4–177.9 °C; <sup>1</sup>H NMR (600 MHz, CDCl<sub>3</sub>): δ 7.66 (d, *J* = 7.8 Hz, 2H), 7.62–7.58 (m, 4H), 7.42–7.39 (m, 4H), 7.31–7.29 (m, 2H), 7.11 (t, *J* = 7.2 Hz, 1H), 6.98 (t, *J* = 7.8 Hz, 2H), 6.63 (d, *J* = 7.2 Hz, 2H); <sup>13</sup>C{<sup>1</sup>H} NMR (150 MHz, CDCl<sub>3</sub>): δ 171.7, 162.5, 141.4, 140.3, 133.4, 130.7, 130.6 (C–F, 2*J*<sub>C–F</sub> = 33.7 Hz), 129.84, 129.77, 128.54, 128.48, 127.6, 126.5, 125.3 (C–F, 4*J*<sub>C–F</sub> = 3.6 Hz), 124.1, 123.9 (C–F, 1*J*<sub>C–F</sub> = 270.4 Hz), 120.8, 93.0; <sup>19</sup>F{<sup>1</sup>H} NMR (565 MHz, CDCl<sub>3</sub>): δ -62.8. HRMS (ESI) *m/z*: [M+H]<sup>+</sup> calcd for C<sub>29</sub>H<sub>18</sub>F<sub>3</sub>O<sub>2</sub><sup>+</sup>, 455.1253; found, 455.1254.

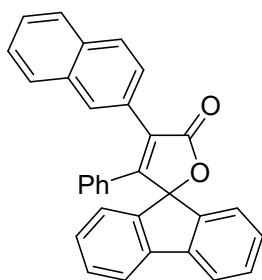

**4'-(Naphthalen-2-yl)-3'-phenyl-5'*H*-spiro[fluorene-9,2'-furan]-5'-one (3p).**

Following the general procedure for the synthesis of **3**, the crude product was purified by silica gel column chromatography (eluent: petroleum ether/EtOAc = 9:1) to afford a white solid (89.5 mg, 82% yield), mp 217.2–218.5 °C; <sup>1</sup>H NMR (600 MHz, CDCl<sub>3</sub>): δ 8.28 (s, 1H), 7.84–7.82 (m, 1H), 7.78–7.77 (m, 1H), 7.70 (d, *J* = 8.4 Hz, 1H), 7.60 (d, *J* = 7.8 Hz, 2H), 7.49–7.45 (m, 2H), 7.43 (d, *J* = 7.8 Hz, 2H), 7.40–7.38 (m, 3H), 7.30–7.27 (m, 2H), 7.06 (t, *J* = 7.5 Hz, 1H), 6.92 (t, *J* = 8.1 Hz, 2H), 6.69 (d, *J* = 7.2 Hz, 2H); <sup>13</sup>C{<sup>1</sup>H} NMR (150 MHz, CDCl<sub>3</sub>): δ 172.3, 160.4, 141.3, 140.8, 133.1, 130.8, 130.5, 129.50, 129.46, 128.6, 128.4, 128.3, 127.9, 127.7, 127.6, 127.2, 126.8, 126.5, 126.3, 124.2, 120.7, 92.7. HRMS (ESI) *m/z*: [M+H]<sup>+</sup> calcd for C<sub>32</sub>H<sub>21</sub>FO<sub>2</sub><sup>+</sup>, 437.1536; found, 437.1533.

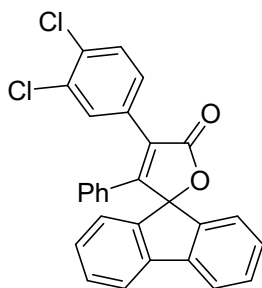

**4'-(3,4-Dichlorophenyl)-3'-phenyl-5'*H*-spiro[fluorene-9,2'-furan]-5'-one (3q).**

Following the general procedure for the synthesis of **3**, the crude product was purified by silica gel column chromatography (eluent: petroleum ether/EtOAc = 9:1) to afford a white solid (91.1 mg, 80% yield), mp 186.2–187.8 °C; <sup>1</sup>H NMR (600 MHz, CDCl<sub>3</sub>): δ 7.71 (d, *J* = 2.4 Hz, 1H), 7.61 (d, *J* = 7.8 Hz, 2H), 7.42–7.36 (m, 5H), 7.32–7.29 (m, 3H), 7.13 (t, *J* = 7.5 Hz, 1H), 7.00 (t, *J* = 7.8 Hz, 2H), 6.63 (d, *J* = 7.8 Hz, 2H); <sup>13</sup>C{<sup>1</sup>H} NMR (150 MHz, CDCl<sub>3</sub>): δ 171.5, 162.1, 141.4, 140.2, 133.1, 132.7, 131.2, 130.7, 130.4, 130.2, 129.8, 129.7, 128.7, 128.6, 128.5, 127.6, 125.5, 124.1, 120.8, 92.9. HRMS (ESI) *m/z*: [M+H]<sup>+</sup> calcd for C<sub>28</sub>H<sub>17</sub>Cl<sub>2</sub>O<sub>2</sub><sup>+</sup>, 455.0600; found, 455.0597.

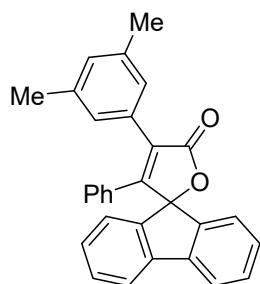

**4'-(3,5-Dimethylphenyl)-3'-phenyl-5'*H*-spiro[fluorene-9,2'-furan]-5'-one (3r).**

Following the general procedure for the synthesis of **3**, the crude product was purified by silica gel column chromatography (eluent: petroleum ether/EtOAc = 9:1) to afford a white solid (86.0 mg, 83% yield), mp 194.7–196.2 °C; <sup>1</sup>H NMR (600 MHz, CDCl<sub>3</sub>): δ 7.61 (d, *J* = 7.2 Hz, 2H), 7.40–7.38 (m, 4H), 7.28 (t, *J* = 7.5 Hz, 2H), 7.13 (s, 2H), 7.06 (t, *J* = 7.2 Hz, 1H), 6.97–6.93 (m, 3H), 6.66 (d, *J* = 7.2 Hz, 2H), 2.24 (s, 6H); <sup>13</sup>C{<sup>1</sup>H} NMR (150 MHz, CDCl<sub>3</sub>): δ 172.4, 159.7, 141.3, 140.9, 137.9, 130.9, 130.5, 130.4, 129.7, 129.2, 128.4, 128.20, 128.15, 127.8, 127.2, 124.1, 120.6, 92.6, 21.2. HRMS (ESI) *m/z*: [M+H]<sup>+</sup> calcd for C<sub>30</sub>H<sub>23</sub>O<sub>2</sub><sup>+</sup>, 415.1693; found, 415.1695.

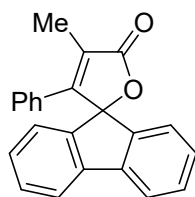

**4'-Methyl-3'-phenyl-5'*H*-spiro[fluorene-9,2'-furan]-5'-one (3s).** Following the general procedure for the synthesis of **3**, the crude product was purified by silica gel column chromatography (eluent: petroleum ether/EtOAc = 9:1) to afford a white solid (36.5 mg, 45% yield), mp 167.3–168.8 °C; <sup>1</sup>H NMR (600 MHz, CDCl<sub>3</sub>): δ 7.59 (d, *J* = 7.8 Hz, 2H), 7.39–7.36 (m, 2H), 7.29 (d, *J* = 7.2 Hz, 2H), 7.27–7.24 (m, 2H), 7.14 (t, *J* = 7.5 Hz, 1H), 7.08 (t, *J* = 7.5 Hz, 2H), 6.77–6.75 (m, 2H), 2.18 (s, 3H); <sup>13</sup>C{<sup>1</sup>H} NMR (150 MHz, CDCl<sub>3</sub>): δ 174.3, 159.3, 141.2, 141.0, 130.8, 130.3, 129.3, 128.3, 127.5, 125.6, 124.0, 120.6, 93.1, 10.6. HRMS (ESI) *m/z*: [M+H]<sup>+</sup> calcd for C<sub>23</sub>H<sub>17</sub>O<sub>2</sub><sup>+</sup>, 325.1223; found, 325.1220.

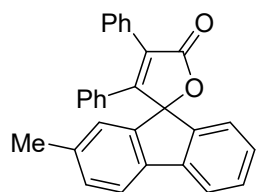

**2-Methyl-3',4'-diphenyl-5'*H*-spiro[fluorene-9,2'-furan]-5'-one (3t).** Following the general procedure for the synthesis of **3**, the crude product was purified by silica gel column chromatography (eluent: petroleum ether/EtOAc = 9:1) to afford a white solid (95.1 mg, 95% yield), mp 195.1–196.7 °C; <sup>1</sup>H NMR (600 MHz, CDCl<sub>3</sub>): δ 7.55–7.54 (m, 3H), 7.48 (d, *J* = 8.4 Hz, 1H), 7.37–7.35 (m, 2H), 7.33–7.32 (m, 3H), 7.25–7.22 (m, 1H), 7.19 (d, *J* = 6.6 Hz, 2H), 7.07 (t, *J* = 7.5 Hz, 1H), 6.95 (t, *J* = 7.8 Hz, 2H), 6.68–6.66 (m, 2H), 2.36 (s, 3H); <sup>13</sup>C{<sup>1</sup>H} NMR (150 MHz, CDCl<sub>3</sub>): δ 172.3, 160.4, 141.5, 140.9, 140.6, 138.7, 138.6, 131.2, 130.8, 130.4, 129.9, 129.5, 129.3, 128.8, 128.4, 128.3, 127.9, 127.8, 127.7, 124.7, 124.1, 120.4, 120.3, 92.7, 21.5. HRMS (ESI) *m/z*: [M+H]<sup>+</sup> calcd for C<sub>29</sub>H<sub>21</sub>O<sub>2</sub><sup>+</sup>, 401.1536; found, 401.1540.

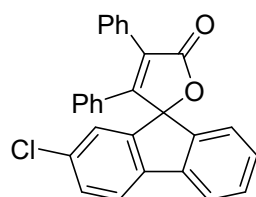

**2-Chloro-3',4'-diphenyl-5'*H*-spiro[fluorene-9,2'-furan]-5'-one (3u).** Following the general procedure for the synthesis of **3**, the crude product was purified by silica gel column chromatography (eluent: petroleum ether/EtOAc = 9:1) to afford a white solid (84.2 mg, 80% yield), mp 205.4–206.9 °C; <sup>1</sup>H NMR (600 MHz, CDCl<sub>3</sub>): δ 7.58 (d, *J* = 7.8 Hz, 1H), 7.54–7.51 (m, 3H), 7.43–7.40 (m, 2H), 7.37–7.35 (m, 2H), 7.34–7.31 (m, 4H), 7.11 (t, *J* = 7.5 Hz, 1H), 6.98 (t, *J* = 7.8 Hz, 2H), 6.66 (d, *J* = 7.2 Hz, 2H); <sup>13</sup>C{<sup>1</sup>H} NMR (150 MHz, CDCl<sub>3</sub>): δ 171.9, 159.6, 142.7, 140.7, 140.3, 139.8, 134.2, 130.7, 130.5, 129.6, 129.53, 129.49, 129.0, 128.7, 128.47, 128.45, 128.1, 127.8, 124.5, 124.3, 121.6, 120.8, 92.1. HRMS (ESI) *m/z*: [M+H]<sup>+</sup> calcd for C<sub>28</sub>H<sub>18</sub>ClO<sub>2</sub><sup>+</sup>, 421.0990; found, 421.0992.

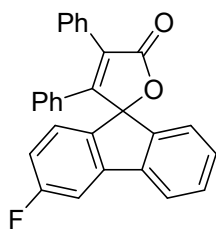

**3-Fluoro-3',4'-diphenyl-5'*H*-spiro[fluorene-9,2'-furan]-5'-one (3v).** Following the general procedure for the synthesis of **3**, the crude product was purified by silica gel column chromatography (eluent: petroleum ether/EtOAc = 9:1) to afford a white solid (87.0 mg, 86% yield), mp 208.4–210.2 °C; <sup>1</sup>H NMR (600 MHz, CDCl<sub>3</sub>): δ 7.58 (d, *J* = 7.8 Hz, 1H), 7.53–7.52 (m, 2H), 7.44–7.40 (m, 2H), 7.36–7.32 (m, 5H), 7.29–7.27 (m, 1H), 7.10 (t, *J* = 7.5 Hz, 1H), 6.99–6.95 (m, 3H), 6.65 (d, *J* = 7.2 Hz, 2H); <sup>13</sup>C{<sup>1</sup>H} NMR (150 MHz, CDCl<sub>3</sub>): δ 172.0, 164.6 (C–F, *1J*<sub>C–F</sub> = 247.2 Hz), 159.9, 143.7 (C–F, *3J*<sub>C–F</sub> = 9.5 Hz), 141.6, 140.2 (C–F, *4J*<sub>C–F</sub> = 2.6 Hz), 136.2 (C–F, *4J*<sub>C–F</sub> = 2.1 Hz), 130.7, 130.6, 129.6, 129.5, 129.1, 128.9, 128.45, 128.40, 127.9, 127.7, 125.6 (C–F, *3J*<sub>C–F</sub> = 9.5 Hz), 124.2, 121.0, 115.2 (C–F, *2J*<sub>C–F</sub> = 23.6 Hz), 108.2 (C–F, *2J*<sub>C–F</sub> = 23.6 Hz), 92.0; <sup>19</sup>F{<sup>1</sup>H} NMR (565 MHz, CDCl<sub>3</sub>): δ -110.2. HRMS (ESI) *m/z*: [M+H]<sup>+</sup> calcd for C<sub>28</sub>H<sub>18</sub>FO<sub>2</sub><sup>+</sup>, 405.1285; found, 405.1288.

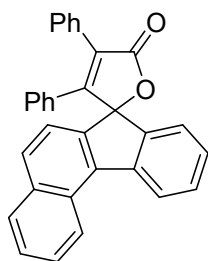

**3',4'-Diphenyl-5'*H*-spiro[benzo[*c*]fluorene-7,2'-furan]-5'-one (3w).** Following the general procedure for the synthesis of **3**, the crude product was purified by silica gel column chromatography (eluent: petroleum ether/EtOAc = 9:1) to afford a white solid (103.7 mg, 95% yield), mp 203.8–205.2 °C; <sup>1</sup>H NMR (600 MHz, CDCl<sub>3</sub>): δ 8.57 (d, *J* = 8.4 Hz, 1H), 8.18 (d, *J* = 7.2 Hz, 1H), 7.90 (d, *J* = 8.4 Hz, 1H), 7.82 (d, *J* = 8.4 Hz, 1H), 7.63–7.60 (m, 1H), 7.56–7.53 (m, 3H), 7.51–7.47 (m, 3H), 7.34–7.32 (m, 4H), 7.02 (t, *J* = 7.2 Hz, 1H), 6.89 (t, *J* = 8.1 Hz, 2H), 6.64 (d, *J* = 7.8 Hz, 2H); <sup>13</sup>C{<sup>1</sup>H} NMR (150 MHz, CDCl<sub>3</sub>): δ 172.3, 160.3, 142.4, 141.6, 139.1, 137.1, 135.3, 130.7, 130.6, 129.8, 129.7, 129.5, 129.42, 129.37, 129.2, 128.9, 128.44, 128.39, 128.3, 127.7, 127.3, 126.6, 124.1, 124.0, 123.7, 120.7, 92.7. HRMS (ESI) *m/z*: [M+H]<sup>+</sup> calcd for



$C_{32}H_{21}O_2^+$ , 437.1536; found, 437.1539.

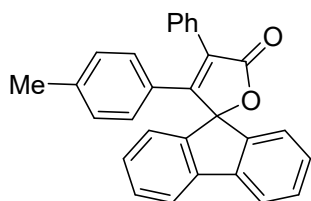

**4'-Phenyl-3'-(*p*-tolyl)-5'*H*-spiro[fluorene-9,2'-furan]-5'-one (3x).** Following the general procedure for the synthesis of **3**, the crude product was purified by silica gel column chromatography (eluent: petroleum ether/EtOAc = 9:1) to afford a white solid (88.1 mg, 88% yield), mp 164.5–166.1 °C;  $^1H$  NMR (600 MHz,  $CDCl_3$ ):  $\delta$  7.61 (d,  $J$  = 7.8 Hz, 2H), 7.55–7.53 (m, 2H), 7.40–7.38 (m, 4H), 7.34–7.33 (m, 3H), 7.28 (t,  $J$  = 7.5 Hz, 2H), 6.74 (d,  $J$  = 7.8 Hz, 2H), 6.55 (d,  $J$  = 8.4 Hz, 2H), 2.10 (s, 3H);  $^{13}C\{^1H\}$  NMR (150 MHz,  $CDCl_3$ ):  $\delta$  172.4, 160.3, 141.3, 141.0, 139.6, 130.4, 130.1, 129.5, 129.1, 128.7, 128.4, 127.8, 127.7, 127.4, 124.2, 120.6, 92.6, 21.2. HRMS (ESI)  $m/z$ :  $[M+H]^+$  calcd for  $C_{29}H_{21}O_2^+$ , 401.1536; found, 401.1540.

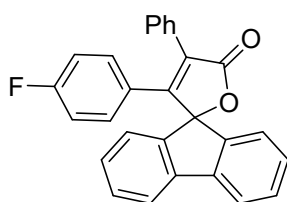

**3'-(4-Fluorophenyl)-4'-phenyl-5'*H*-spiro[fluorene-9,2'-furan]-5'-one (3y).** Following the general procedure for the synthesis of **3**, the crude product was purified by silica gel column chromatography (eluent: petroleum ether/EtOAc = 9:1) to afford a white solid (97.1 mg, 96% yield), mp 188.7–190.3 °C;  $^1H$  NMR (600 MHz,  $CDCl_3$ ):  $\delta$  7.63 (d,  $J$  = 7.8 Hz, 2H), 7.53–7.51 (m, 2H), 7.43–7.40 (m, 2H), 7.38 (d,  $J$  = 7.8 Hz, 2H), 7.35 (t,  $J$  = 3.3 Hz, 3H), 7.31–7.29 (m, 2H), 6.65–6.64 (m, 4H);  $^{13}C\{^1H\}$  NMR (150 MHz,  $CDCl_3$ ):  $\delta$  172.1, 162.9 (C–F,  $1J_{C-F}$  = 249.2 Hz), 159.1, 141.3, 140.6, 130.6, 129.9 (C–F,  $3J_{C-F}$  = 8.4 Hz), 129.6, 129.5, 129.0, 128.54, 128.52, 128.0, 126.8 (C–F,  $4J_{C-F}$  = 3.3 Hz), 124.1, 120.8, 115.6 (C–F,  $2J_{C-F}$  = 21.6 Hz), 92.6;  $^{19}F\{^1H\}$  NMR (565 MHz,  $CDCl_3$ ):  $\delta$  -110.2. HRMS (ESI)  $m/z$ :  $[M+H]^+$  calcd for  $C_{28}H_{18}FO_2^+$ , 405.1285; found, 405.1285.

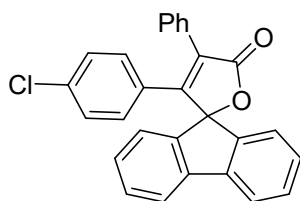

**3'-(4-Chlorophenyl)-4'-phenyl-5'*H*-spiro[fluorene-9,2'-furan]-5'-one (3z).**

Following the general procedure for the synthesis of **3**, the crude product was purified by silica gel column chromatography (eluent: petroleum ether/EtOAc = 9:1) to afford a white solid (87.3 mg, 83% yield), mp 236.4–238.1 °C; <sup>1</sup>H NMR (600 MHz, CDCl<sub>3</sub>): δ 7.63 (d, *J* = 7.8 Hz, 2H), 7.52–7.51 (m, 2H), 7.42 (t, *J* = 7.5 Hz, 2H), 7.38 (d, *J* = 7.2 Hz, 2H), 7.36–7.35 (m, 3H), 7.30 (t, *J* = 7.5 Hz, 2H), 6.93 (d, *J* = 8.4 Hz, 2H), 6.58 (d, *J* = 9.0 Hz, 2H); <sup>13</sup>C{<sup>1</sup>H} NMR (150 MHz, CDCl<sub>3</sub>): δ 171.9, 158.9, 141.3, 140.5, 135.5, 130.7, 129.5, 129.2, 129.1, 128.7, 128.6, 128.5, 124.1, 120.8, 92.5. HRMS (ESI) *m/z*: [M+H]<sup>+</sup> calcd for C<sub>28</sub>H<sub>18</sub>ClO<sub>2</sub><sup>+</sup>, 421.0990; found, 421.0994.

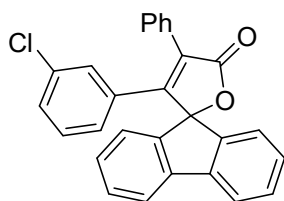

**3'-(3-Chlorophenyl)-4'-phenyl-5'*H*-spiro[fluorene-9,2'-furan]-5'-one (3aa).**

Following the general procedure for the synthesis of **3**, the crude product was purified by silica gel column chromatography (eluent: petroleum ether/EtOAc = 9:1) to afford a white solid (63.1 mg, 60% yield), mp 218.7–220.5 °C; <sup>1</sup>H NMR (600 MHz, CDCl<sub>3</sub>): δ 7.62 (d, *J* = 7.8 Hz, 2H), 7.52–7.51 (m, 2H), 7.42–7.38 (m, 4H), 7.35–7.34 (m, 3H), 7.32–7.29 (m, 2H), 7.05–7.04 (m, 1H), 6.88 (t, *J* = 8.1 Hz, 1H), 6.59 (t, *J* = 1.8 Hz, 1H), 6.53 (d, *J* = 7.8 Hz, 1H); <sup>13</sup>C{<sup>1</sup>H} NMR (150 MHz, CDCl<sub>3</sub>): δ 171.9, 158.6, 141.3, 140.2, 134.2, 132.6, 130.7, 129.7, 129.5, 129.4, 129.2, 129.1, 128.6, 128.53, 128.52, 127.7, 126.0, 124.1, 120.8, 92.6. HRMS (ESI) *m/z*: [M+H]<sup>+</sup> calcd for C<sub>28</sub>H<sub>18</sub>ClO<sub>2</sub><sup>+</sup>, 421.0990; found, 421.0994.

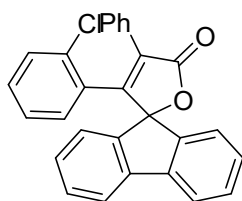

**3'-(2-chlorophenyl)-4'-phenyl-5'*H*-spiro[fluorene-9,2'-furan]-5'-one (3ab).**

Following the general procedure for the synthesis of **3**, the crude product was purified by silica gel column chromatography (eluent: petroleum ether/EtOAc = 9:1) to afford a white solid (53.7 mg, 51% yield), mp 212.2–213.6 °C; <sup>1</sup>H NMR (600 MHz, CDCl<sub>3</sub>): δ 7.60 (s, 1H), 7.55–7.47 (m, 6H), 7.41 (s, 1H), 7.33–7.27 (m, 4H), 7.24–7.21 (m, 1H), 7.07–7.03 (m, 2H), 6.88–6.85 (m, 1H), 6.47–6.45 (m, 1H); <sup>13</sup>C{<sup>1</sup>H} NMR (150 MHz, CDCl<sub>3</sub>): δ 171.8, 156.4, 141.9, 140.8, 140.3, 139.5, 132.1, 130.7, 130.3, 130.24, 130.19, 130.1, 129.7, 129.0, 128.4, 128.33, 128.31, 127.8, 126.3, 125.2, 124.2, 120.8, 120.2, 93.2. HRMS (ESI) m/z: [M+H]<sup>+</sup> calcd for C<sub>28</sub>H<sub>18</sub>ClO<sub>2</sub><sup>+</sup>, 421.0990; found, 421.0992.

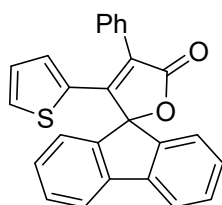

**4'-Phenyl-3'-(thiophen-2-yl)-5'*H*-spiro[fluorene-9,2'-furan]-5'-one (3ac).**

Following the general procedure for the synthesis of **3**, the crude product was purified by silica gel column chromatography (eluent: petroleum ether/EtOAc = 9:1) to afford a yellow solid (60.8 mg, 62% yield), mp 176.3–177.8 °C; <sup>1</sup>H NMR (600 MHz, CDCl<sub>3</sub>): δ 7.86–7.83 (m, 3H), 7.55–7.54 (m, 2H), 7.52–7.49 (m, 1H), 7.47–7.43 (m, 2H), 7.41–7.38 (m, 4H), 7.19–7.16 (m, 1H), 7.15–7.14 (m, 1H), 6.75–6.74 (m, 1H), 6.663–6.655 (m, 1H); <sup>13</sup>C{<sup>1</sup>H} NMR (150 MHz, CDCl<sub>3</sub>): δ 171.4, 158.9, 143.1, 135.7, 134.4, 132.0, 131.6, 129.6, 129.2, 129.09, 129.07, 128.6, 128.3, 127.7, 126.9, 126.8, 126.7, 126.6, 125.5, 124.9, 124.5, 122.8, 84.8. HRMS (ESI) m/z: [M+H]<sup>+</sup> calcd for C<sub>26</sub>H<sub>17</sub>O<sub>2</sub>S<sup>+</sup>, 393.0944; found, 393.0940.

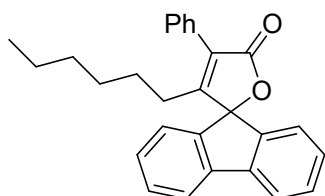

**3'-hexyl-4'-phenyl-5'*H*-spiro[fluorene-9,2'-furan]-5'-one (3ad).** Following the general procedure for the synthesis of **3**, the crude product was purified by silica gel column chromatography (eluent: petroleum ether/EtOAc = 15:1) to afford a yellow

liquid (74.0 mg, 75% yield);  $^1\text{H}$  NMR (600 MHz,  $\text{CDCl}_3$ ):  $\delta$  7.71 (d,  $J = 7.8$  Hz, 2H), 7.61 (d,  $J = 7.2$  Hz, 2H), 7.49–7.44 (m, 4H), 7.41 (t,  $J = 7.5$  Hz, 1H), 7.31–7.28 (m, 4H), 1.99 (t,  $J = 7.5$  Hz, 2H), 1.00–0.95 (m, 2H), 0.91–0.89 (m, 4H), 0.85–0.81 (m, 2H), 0.69 (t,  $J = 7.2$  Hz, 3H);  $^{13}\text{C}\{^1\text{H}\}$  NMR (150 MHz,  $\text{CDCl}_3$ ):  $\delta$  172.9, 164.9, 141.2, 140.9, 130.4, 130.3, 128.9, 128.6, 128.5, 128.2, 127.7, 124.1, 120.6, 93.1, 30.7, 29.0, 27.5, 26.5, 22.0, 13.8. HRMS (ESI)  $m/z$ :  $[\text{M}+\text{H}]^+$  calcd for  $\text{C}_{28}\text{H}_{27}\text{O}_2^+$ , 395.2006; found, 395.2003.

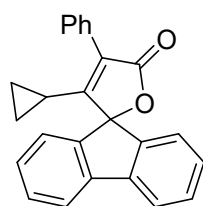

**3'-Cyclopropyl-4'-phenyl-5'*H*-spiro[fluorene-9,2'-furan]-5'-one (3ae).** Following the general procedure for the synthesis of **3**, the crude product was purified by silica gel column chromatography (eluent: petroleum ether/EtOAc = 9:1) to afford a white solid (61.3 mg, 70% yield), mp 168.5–169.7 °C;  $^1\text{H}$  NMR (600 MHz,  $\text{CDCl}_3$ ):  $\delta$  7.71–7.69 (m, 4H), 7.49 (t,  $J = 7.8$  Hz, 2H), 7.47–7.44 (m, 2H), 7.41 (t,  $J = 7.5$  Hz, 1H), 7.33–7.30 (m, 4H), 1.60–1.55 (m, 1H), 0.50–0.47 (m, 2H), 0.16–0.14 (m, 2H);  $^{13}\text{C}\{^1\text{H}\}$  NMR (150 MHz,  $\text{CDCl}_3$ ):  $\delta$  172.4, 164.1, 141.5, 140.9, 130.5, 130.2, 129.6, 128.6, 128.4, 128.1, 124.2, 120.7, 91.9, 10.4, 8.3. HRMS (ESI)  $m/z$ :  $[\text{M}+\text{H}]^+$  calcd for  $\text{C}_{25}\text{H}_{19}\text{O}_2^+$ , 351.1380; found, 351.1379.

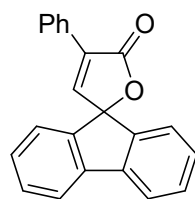

**4'-Phenyl-5'*H*-spiro[fluorene-9,2'-furan]-5'-one (3af).** Following the general procedure for the synthesis of **3**, the crude product was purified by silica gel column chromatography (eluent: petroleum ether/EtOAc = 9:1) to afford a white solid (62.8 mg, 81% yield), mp 165.4–166.8 °C;  $^1\text{H}$  NMR (600 MHz,  $\text{CDCl}_3$ ):  $\delta$  7.98–7.96 (m, 2H), 7.70 (d,  $J = 7.2$  Hz, 2H), 7.46–7.45 (m, 2H), 7.44–7.40 (m, 3H), 7.35 (s, 1H), 7.30–7.27 (m, 4H);  $^{13}\text{C}\{^1\text{H}\}$  NMR (150 MHz,  $\text{CDCl}_3$ ):  $\delta$  171.9, 147.8, 140.7, 140.0, 131.1, 130.6, 129.6, 129.2, 128.8, 128.3, 127.2, 124.4, 120.7, 90.5. HRMS (ESI)  $m/z$ :

$[M+H]^+$  calcd for  $C_{22}H_{15}O_2^+$ , 311.1067; found, 311.1068.

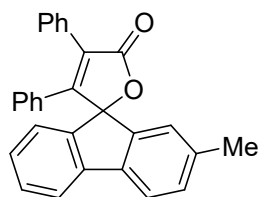

**2-Methyl-3',4'-diphenyl-5'*H*-spiro[fluorene-9,2'-furan]-5'-one (3ag).** Following the general procedure for the synthesis of **3**, the crude product was purified by silica gel column chromatography (eluent: petroleum ether/EtOAc = 9:1) to afford a white solid (91.1 mg, 91% yield), mp 171.1–172.4 °C;  $^1H$  NMR (600 MHz,  $CDCl_3$ ):  $\delta$  7.56–7.54 (m, 3H), 7.48 (d,  $J = 8.4$  Hz, 1H), 7.37–7.35 (m, 2H), 7.33 (t,  $J = 3.0$  Hz, 3H), 7.24 (t,  $J = 7.5$  Hz, 1H), 7.20 (d,  $J = 5.4$  Hz, 2H), 7.07 (t,  $J = 7.5$  Hz, 1H), 6.95 (t,  $J = 7.8$  Hz, 2H), 6.67 (d,  $J = 7.2$  Hz, 2H), 2.36 (s, 3H);  $^{13}C\{^1H\}$  NMR (150 MHz,  $CDCl_3$ ):  $\delta$  172.3, 160.4, 141.5, 141.0, 140.6, 138.7, 138.6, 131.2, 130.8, 130.4, 129.9, 129.5, 129.3, 128.8, 128.4, 128.3, 127.9, 127.8, 127.7, 124.7, 124.1, 120.4, 120.3, 92.7, 21.5. HRMS (ESI)  $m/z$ :  $[M+H]^+$  calcd for  $C_{29}H_{21}O_2^+$ , 401.1536; found, 401.1537.

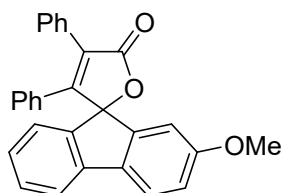

**2-Methoxy-3',4'-diphenyl-5'*H*-spiro[fluorene-9,2'-furan]-5'-one (3ah).** Following the general procedure for the synthesis of **3**, the crude product was purified by silica gel column chromatography (eluent: petroleum ether/EtOAc = 9:1) to afford a white solid (93.7 mg, 90% yield), mp 191.4–193.2 °C;  $^1H$  NMR (600 MHz,  $CDCl_3$ ):  $\delta$  7.54–7.53 (m, 2H), 7.51–7.50 (m, 2H), 7.37–7.33 (m, 5H), 7.22–7.20 (m, 1H), 7.09 (t,  $J = 7.5$  Hz, 1H), 6.97 (t,  $J = 8.1$  Hz, 2H), 6.94–6.92 (m, 2H), 6.69–6.67 (m, 2H), 3.80 (s, 3H);  $^{13}C\{^1H\}$  NMR (150 MHz,  $CDCl_3$ ):  $\delta$  172.3, 160.38, 160.37, 142.6, 141.4, 140.3, 134.1, 130.8, 130.5, 129.8, 129.5, 129.4, 128.8, 128.4, 128.3, 127.8, 127.7, 127.2, 124.0, 121.6, 119.8, 116.2, 109.8, 92.5, 55.7. HRMS (ESI)  $m/z$ :  $[M+H]^+$  calcd for  $C_{29}H_{21}O_3^+$ , 417.1485; found, 417.1489.

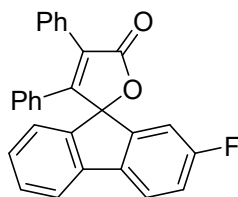

**2-Fluoro-3',4'-diphenyl-5'*H*-spiro[fluorene-9,2'-furan]-5'-one (3ai).** Following the general procedure for the synthesis of **3**, the crude product was purified by silica gel column chromatography (eluent: petroleum ether/EtOAc = 9:1) to afford a white solid (94.0 mg, 93% yield), mp 185.8–187.5 °C;  $^1\text{H}$  NMR (600 MHz,  $\text{CDCl}_3$ ):  $\delta$  7.56–7.52 (m, 4H), 7.41–7.39 (m, 2H), 7.334–7.325 (m, 3H), 7.29 (t,  $J = 7.5$  Hz, 1H), 7.11–7.06 (m, 3H), 6.97 (t,  $J = 8.1$  Hz, 2H), 6.66 (d,  $J = 7.2$  Hz, 2H);  $^{13}\text{C}\{^1\text{H}\}$  NMR (150 MHz,  $\text{CDCl}_3$ ):  $\delta$  171.9, 163.0 (C–F,  $1J_{\text{C-F}} = 247.5$  Hz), 159.7, 143.1 (C–F,  $3J_{\text{C-F}} = 8.0$  Hz), 140.7, 140.5, 137.3 (C–F,  $4J_{\text{C-F}} = 2.3$  Hz), 130.7, 130.5, 129.52, 129.46, 129.0, 128.5, 128.4, 128.1, 128.0, 127.7, 124.2, 121.8 (C–F,  $3J_{\text{C-F}} = 8.4$  Hz), 120.4, 117.5 (C–F,  $2J_{\text{C-F}} = 22.8$  Hz), 111.8 (C–F,  $2J_{\text{C-F}} = 23.7$  Hz), 92.1 (C–F,  $4J_{\text{C-F}} = 1.5$  Hz);  $^{19}\text{F}\{^1\text{H}\}$  NMR (565 MHz,  $\text{CDCl}_3$ ):  $\delta$  -112.1. HRMS (ESI)  $m/z$ :  $[\text{M}+\text{H}]^+$  calcd for  $\text{C}_{28}\text{H}_{18}\text{FO}_2^+$ , 405.1285; found, 405.1285.

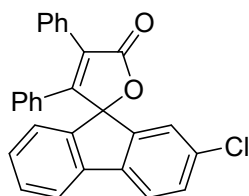

**2-Chloro-3',4'-diphenyl-5'*H*-spiro[fluorene-9,2'-furan]-5'-one (3aj).** Following the general procedure for the synthesis of **3**, the crude product was purified by silica gel column chromatography (eluent: petroleum ether/EtOAc = 9:1) to afford a white solid (92.6 mg, 88% yield), mp 163.2–164.7 °C;  $^1\text{H}$  NMR (600 MHz,  $\text{CDCl}_3$ ):  $\delta$  7.59 (d,  $J = 7.8$  Hz, 1H), 7.54–7.53 (m, 3H), 7.44–7.40 (m, 2H), 7.38–7.37 (m, 2H), 7.34–7.31 (m, 4H), 7.12 (t,  $J = 7.5$  Hz, 1H), 6.99 (t,  $J = 7.8$  Hz, 2H), 6.66 (d,  $J = 7.8$  Hz, 2H);  $^{13}\text{C}\{^1\text{H}\}$  NMR (150 MHz,  $\text{CDCl}_3$ ):  $\delta$  171.9, 159.6, 142.7, 140.7, 140.3, 139.9, 134.2, 130.7, 130.5, 129.6, 129.54, 129.50, 129.0, 128.8, 128.48, 128.46, 128.1, 124.6, 124.3, 121.7, 120.8, 92.2. HRMS (ESI)  $m/z$ :  $[\text{M}+\text{H}]^+$  calcd for  $\text{C}_{28}\text{H}_{18}\text{ClO}_2^+$ , 421.0990; found, 421.0987.

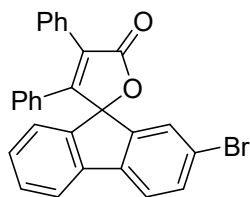

**2-Bromo-3',4'-diphenyl-5'*H*-spiro[fluorene-9,2'-furan]-5'-one (3ak).** Following the general procedure for the synthesis of **3**, the crude product was purified by silica gel column chromatography (eluent: petroleum ether/EtOAc = 9:1) to afford a white solid (98.9 mg, 85% yield), mp 208.6–209.9 °C; <sup>1</sup>H NMR (600 MHz, CDCl<sub>3</sub>): δ 7.58 (d, *J* = 7.8 Hz, 1H), 7.54–7.50 (m, 4H), 7.46–7.45 (m, 1H), 7.42–7.39 (m, 2H), 7.35–7.31 (m, 4H), 7.10 (t, *J* = 7.5 Hz, 1H), 6.98 (t, *J* = 7.8 Hz, 2H), 6.67–6.65 (m, 2H); <sup>13</sup>C{<sup>1</sup>H} NMR (150 MHz, CDCl<sub>3</sub>): δ 171.9, 159.5, 142.9, 140.5, 140.3, 133.6, 130.7, 130.5, 129.6, 129.50, 129.48, 129.0, 128.9, 128.46, 128.45, 128.1, 127.8, 127.4, 124.2, 122.03, 121.99, 120.8, 92.1. HRMS (ESI) *m/z*: [M+H]<sup>+</sup> calcd for C<sub>28</sub>H<sub>18</sub>BrO<sub>2</sub><sup>+</sup>, 465.0485; found, 465.0489.

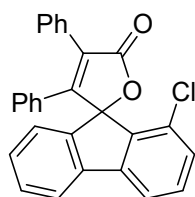

**1-Chloro-3',4'-diphenyl-5'*H*-spiro[fluorene-9,2'-furan]-5'-one (3al).** Following the general procedure for the synthesis of **3**, the crude product was purified by silica gel column chromatography (eluent: petroleum ether/EtOAc = 9:1) to afford a white solid (53.7 mg, 51% yield), mp 205.2–206.9 °C; <sup>1</sup>H NMR (600 MHz, DMSO): δ 7.91 (d, *J* = 7.8 Hz, 1H), 7.86 (d, *J* = 7.8 Hz, 1H), 7.69 (d, *J* = 7.8 Hz, 1H), 7.57–7.53 (m, 2H), 7.47 (t, *J* = 7.5 Hz, 1H), 7.43–7.39 (m, 6H), 7.17 (t, *J* = 7.2 Hz, 1H), 7.08 (t, *J* = 7.8 Hz, 2H), 6.64 (d, *J* = 7.2 Hz, 2H); <sup>13</sup>C{<sup>1</sup>H} NMR (150 MHz, DMSO): δ 171.2, 157.7, 143.6, 140.1, 139.4, 135.7, 133.1, 131.2, 131.1, 130.3, 129.8, 129.71, 129.69, 129.6, 129.5, 129.1, 129.0, 128.6, 128.5, 127.1, 124.4, 121.7, 120.1, 92.2. HRMS (ESI) *m/z*: [M+H]<sup>+</sup> calcd for C<sub>28</sub>H<sub>18</sub>ClO<sub>2</sub><sup>+</sup>, 421.0990; found, 421.0986.

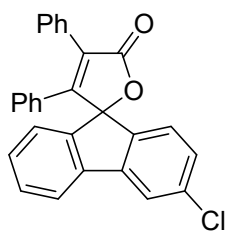

**3-Chloro-3',4'-diphenyl-5'*H*-spiro[fluorene-9,2'-furan]-5'-one (3al')**. Following the general procedure for the synthesis of **3**, the crude product was purified by silica gel column chromatography (eluent: petroleum ether/EtOAc = 9:1) to afford a white solid (21.0 mg, 20% yield), mp 215.7–217.5 °C; <sup>1</sup>H NMR (600 MHz, DMSO): δ 8.02 (d, *J* = 1.8 Hz, 1H), 7.93 (d, *J* = 7.8 Hz, 1H), 7.71 (d, *J* = 7.8 Hz, 1H), 7.68 (d, *J* = 7.2 Hz, 1H), 7.55–7.52 (m, 1H), 7.49–7.47 (m, 2H), 7.46–7.42 (m, 2H), 7.39–7.38 (m, 3H), 7.15 (t, *J* = 7.5 Hz, 1H), 7.07 (t, *J* = 7.8 Hz, 2H), 6.64 (d, *J* = 7.2 Hz, 2H); <sup>13</sup>C{<sup>1</sup>H} NMR (150 MHz, DMSO): δ 171.2, 158.8, 142.9, 140.7, 139.5, 139.0, 135.7, 131.0, 130.4, 129.7, 129.6, 129.5, 128.9, 128.5, 128.4, 128.3, 127.4, 126.3, 124.7, 121.8, 121.5, 91.6. HRMS (ESI) *m/z*: [M+H]<sup>+</sup> calcd for C<sub>28</sub>H<sub>18</sub>ClO<sub>2</sub><sup>+</sup>, 421.0990; found, 421.0987.

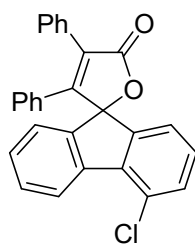

**4-Chloro-3',4'-diphenyl-5'*H*-spiro[fluorene-9,2'-furan]-5'-one (3am)**. Following the general procedure for the synthesis of **3**, the crude product was purified by silica gel column chromatography (eluent: petroleum ether/EtOAc = 9:1) to afford a white solid (69.4 mg, 66% yield), mp 188.2–189.8 °C; <sup>1</sup>H NMR (600 MHz, CDCl<sub>3</sub>): δ 8.27 (d, *J* = 7.8 Hz, 1H), 7.53–7.52 (m, 2H), 7.47–7.45 (m, 1H), 7.43 (d, *J* = 7.2 Hz, 1H), 7.38–7.33 (m, 5H), 7.30 (d, *J* = 7.8 Hz, 1H), 7.21 (t, *J* = 7.5 Hz, 1H), 7.10 (t, *J* = 7.5 Hz, 1H), 6.98 (t, *J* = 7.8 Hz, 2H), 6.64 (d, *J* = 7.8 Hz, 2H); <sup>13</sup>C{<sup>1</sup>H} NMR (150 MHz, CDCl<sub>3</sub>): δ 172.0, 159.7, 143.2, 140.7, 140.0, 138.1, 132.0, 130.7, 130.6, 129.6, 129.54, 129.47, 129.01, 128.96, 128.9, 128.5, 128.1, 127.7, 124.4, 124.0, 122.5, 92.2. HRMS (ESI) *m/z*: [M+H]<sup>+</sup> calcd for C<sub>28</sub>H<sub>18</sub>ClO<sub>2</sub><sup>+</sup>, 421.0990; found, 421.0993.



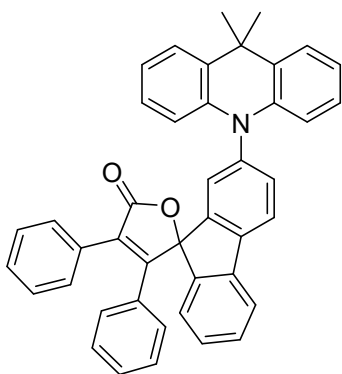

**2-(9,9-Dimethylacridin-10(9H)-yl)-3',4'-diphenyl-**

**5'*H*-spiro[fluorene-9,2'-furan]-5'-one (4).** White solid, mp 212.6–213.8 °C; <sup>1</sup>H NMR (600 MHz, CDCl<sub>3</sub>): δ 7.82 (d, *J* = 7.8 Hz, 1H), 7.73 (d, *J* = 7.8 Hz, 1H), 7.54 (t, *J* = 7.5 Hz, 2H), 7.48–7.47 (m, 2H), 7.46–7.42 (m, 3H), 7.33 (d, *J* = 1.8 Hz, 1H), 7.30–7.26 (m, 4H), 7.20 (t, *J* = 7.5 Hz, 1H), 7.06 (t, *J* = 7.8 Hz, 2H), 6.92–6.87 (m, 4H), 6.69 (d, *J* = 7.8 Hz, 2H), 6.06–6.04 (m, 2H), 1.67 (s, 6H); <sup>13</sup>C{<sup>1</sup>H} NMR (150 MHz, CDCl<sub>3</sub>): δ 172.0, 160.1, 143.6, 141.3, 141.2, 141.1, 140.7, 140.6, 133.5, 130.9, 129.9, 129.43, 129.40, 129.3, 129.0, 128.9, 128.43, 128.38, 127.91, 127.89, 127.7, 126.4, 125.4, 124.5, 123.0, 121.0, 120.7, 113.8, 92.3, 35.9, 31.4. HRMS (ESI) *m/z*: [M+H]<sup>+</sup> calcd for C<sub>43</sub>H<sub>32</sub>NO<sub>2</sub><sup>+</sup>, 594.2428; found, 594.2429.

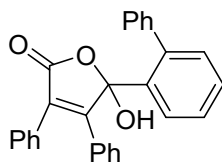

**5-([1,1'-Biphenyl]-2-yl)-5-hydroxy-3,4-diphenylfuran-2(5H)-one (5).** White solid mp 168.7–170.2 °C; <sup>1</sup>H NMR (600 MHz, CDCl<sub>3</sub>): δ 7.96–7.94 (m, 1H), 7.40–7.30 (m, 5H), 7.25–7.20 (m, 5H), 7.17 (t, *J* = 7.5 Hz, 2H), 7.13 (t, *J* = 7.5 Hz, 2H), 7.03–7.02 (m, 1H), 6.97 (d, *J* = 7.8 Hz, 2H), 6.87 (s, 1H), 4.55 (s, 1H); <sup>13</sup>C{<sup>1</sup>H} NMR (150 MHz, CDCl<sub>3</sub>): δ 170.8, 157.5, 141.2, 140.6, 133.5, 132.0, 130.0, 129.7, 129.6, 129.35, 129.28, 128.8, 128.6, 128.15, 128.12, 127.9, 127.8, 127.5, 105.1. HRMS (ESI) *m/z*: [M+H]<sup>+</sup> calcd for C<sub>28</sub>H<sub>21</sub>O<sub>3</sub><sup>+</sup>, 405.1485; found, 405.1483.

## 6. $^1\text{H}$ and $^{13}\text{C}$ NMR spectra of *o*-alkynyl biaryls (**2**) and all products

$^1\text{H}$  NMR (600 MHz,  $\text{CDCl}_3$ ) and  $^{13}\text{C}\{^1\text{H}\}$  NMR (150 MHz,  $\text{CDCl}_3$ ) of **2a**

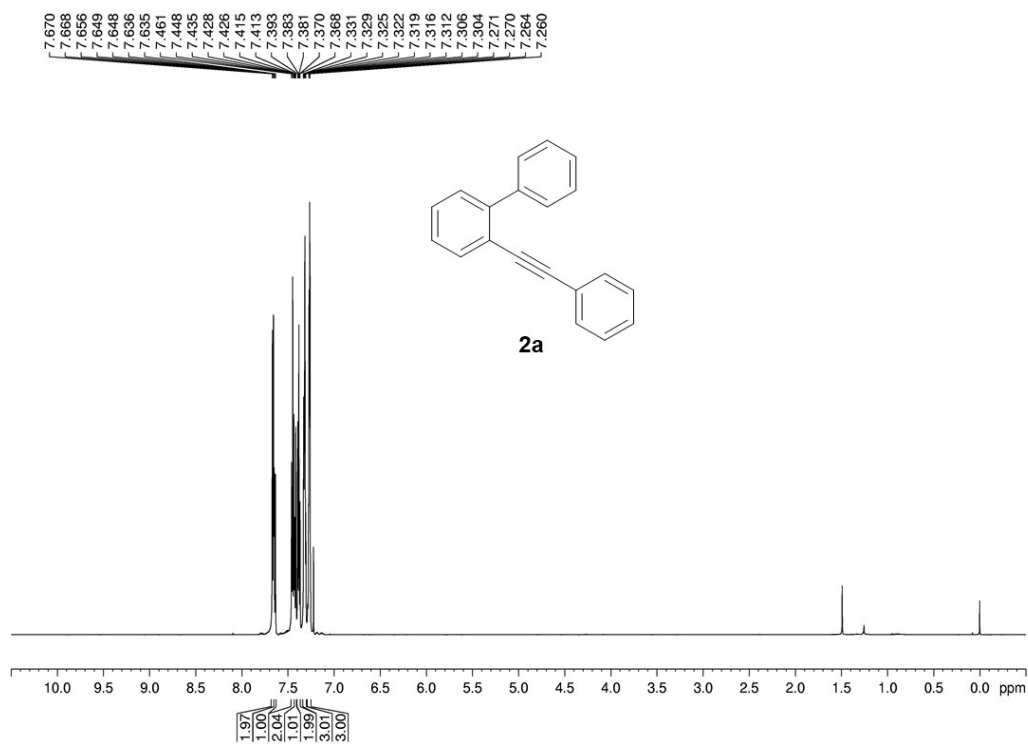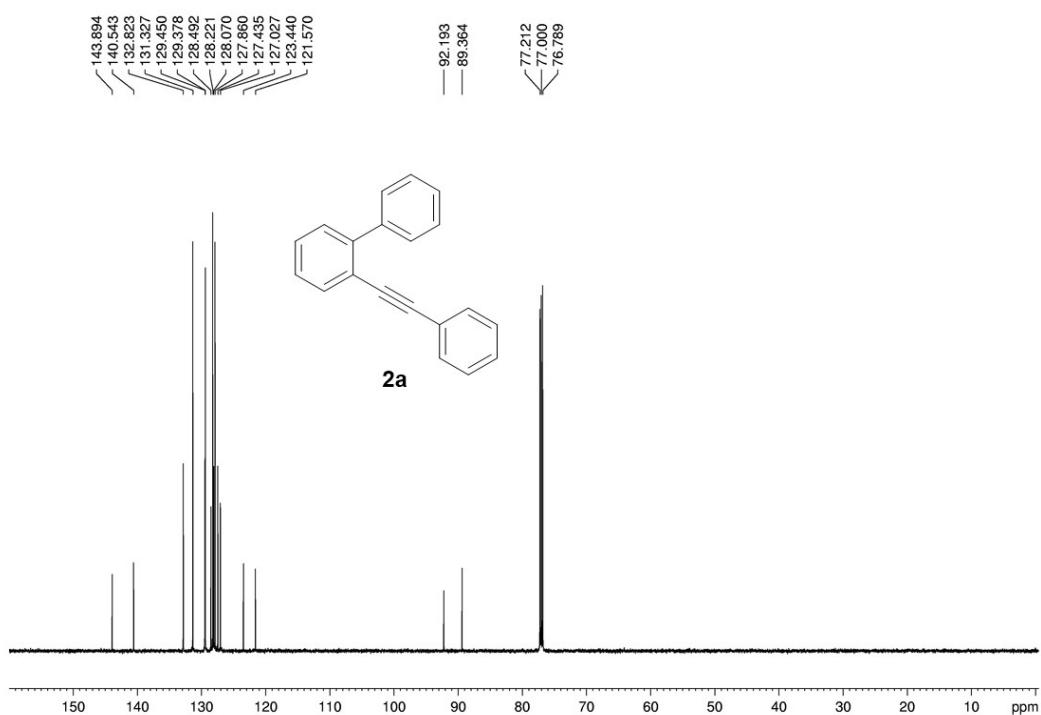

$^1\text{H}$  NMR (600 MHz,  $\text{CDCl}_3$ ) and  $^{13}\text{C}\{^1\text{H}\}$  NMR (150 MHz,  $\text{CDCl}_3$ ) of **2b**

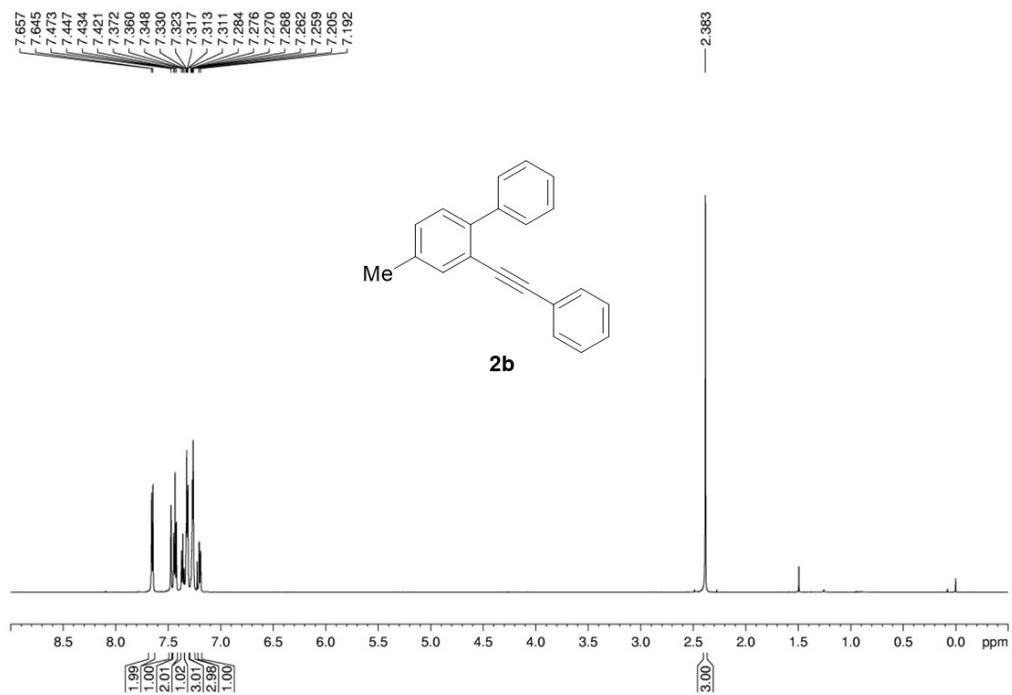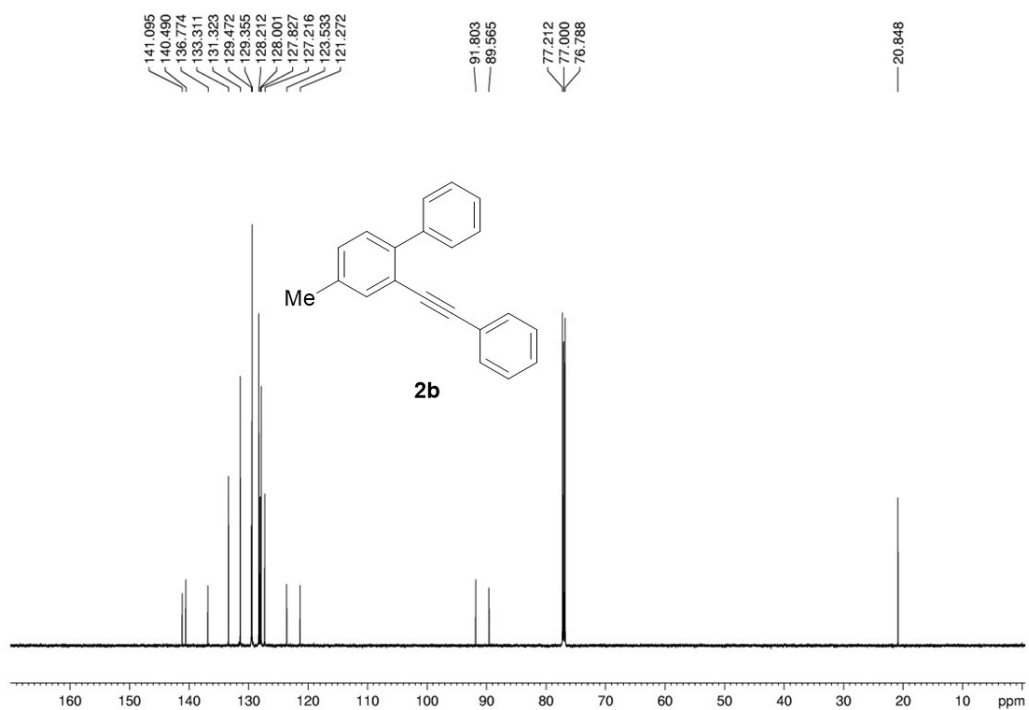

$^1\text{H}$  NMR (600 MHz,  $\text{CDCl}_3$ ) and  $^{13}\text{C}\{^1\text{H}\}$  NMR (150 MHz,  $\text{CDCl}_3$ ) of **2c**

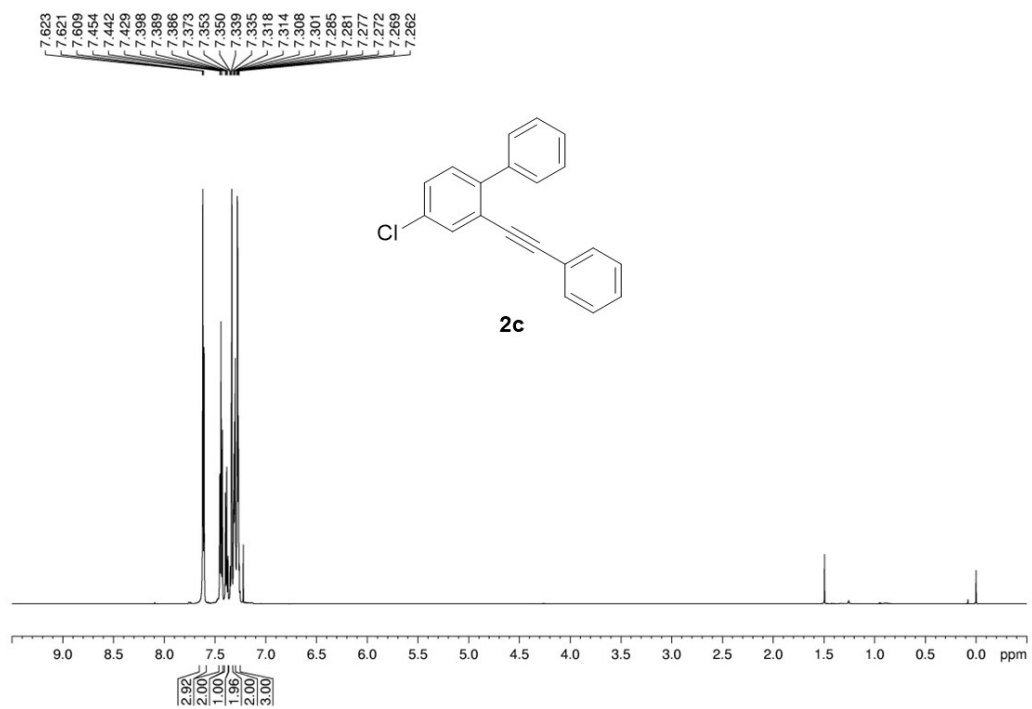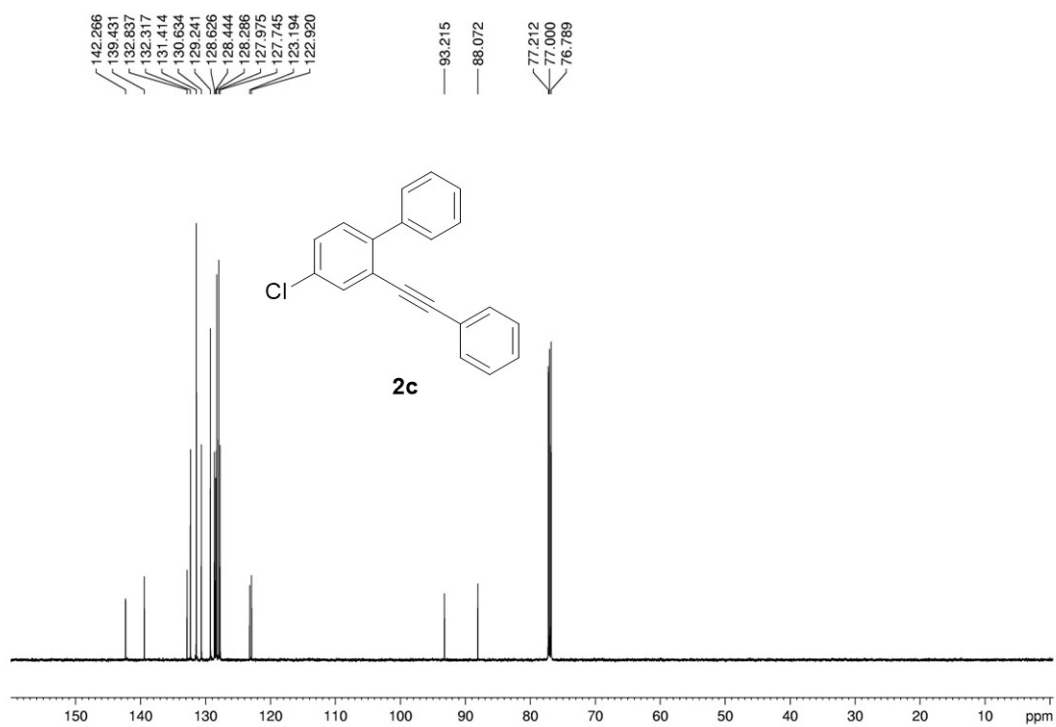

$^1\text{H}$  NMR (600 MHz,  $\text{CDCl}_3$ ),  $^{13}\text{C}\{^1\text{H}\}$  NMR (150 MHz,  $\text{CDCl}_3$ ) and  $^{19}\text{F}\{^1\text{H}\}$  NMR (565 MHz,  $\text{CDCl}_3$ ) of **2d**

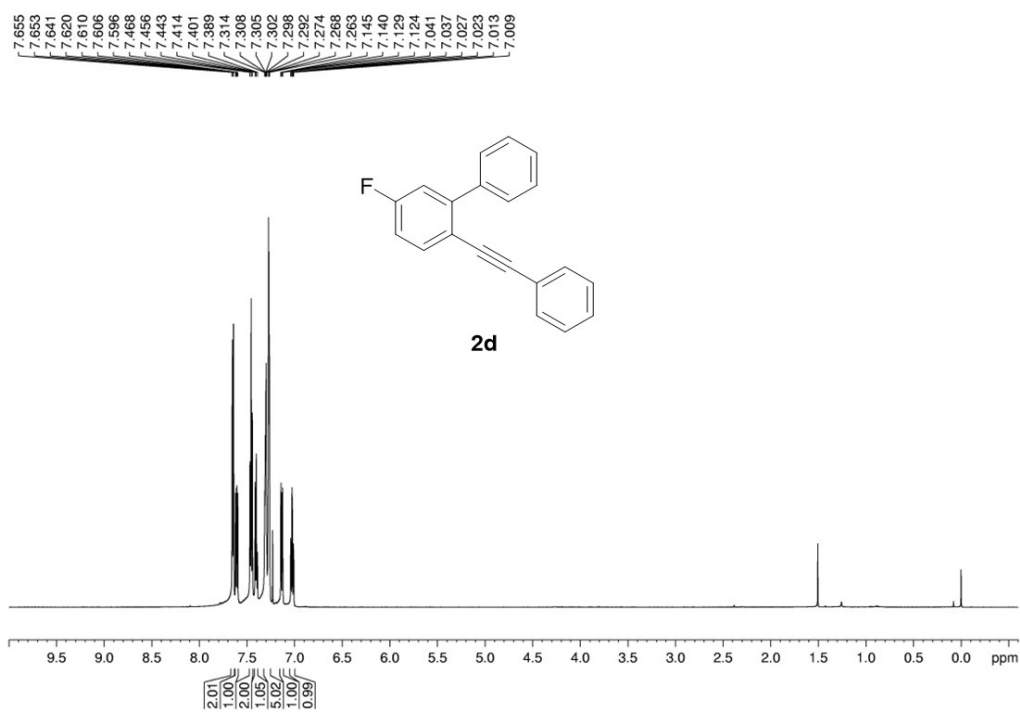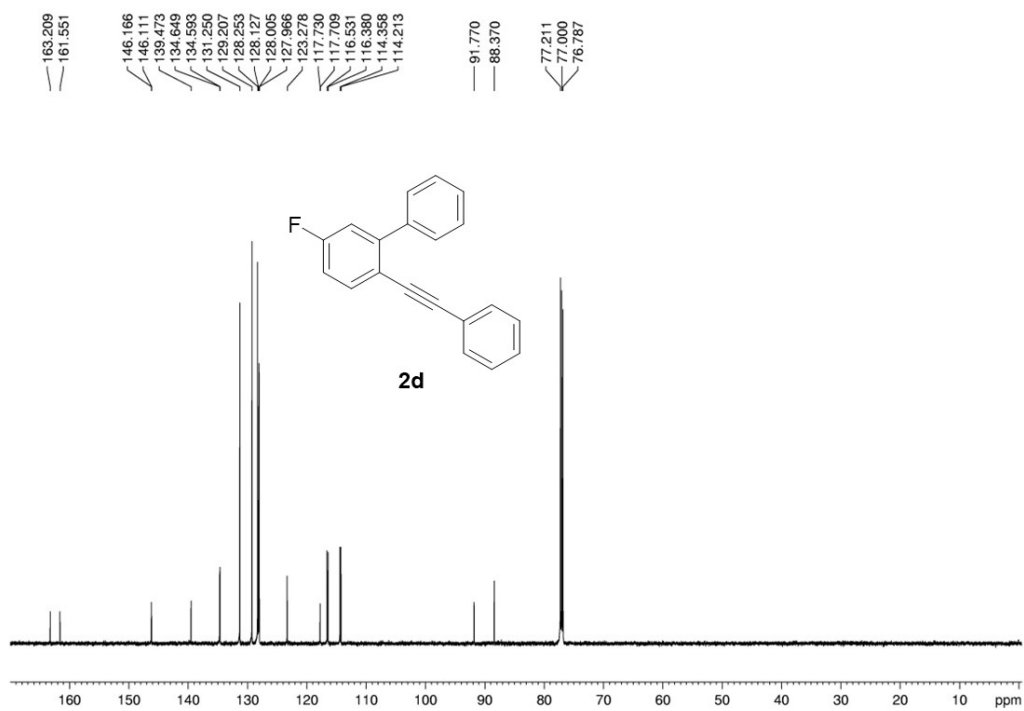

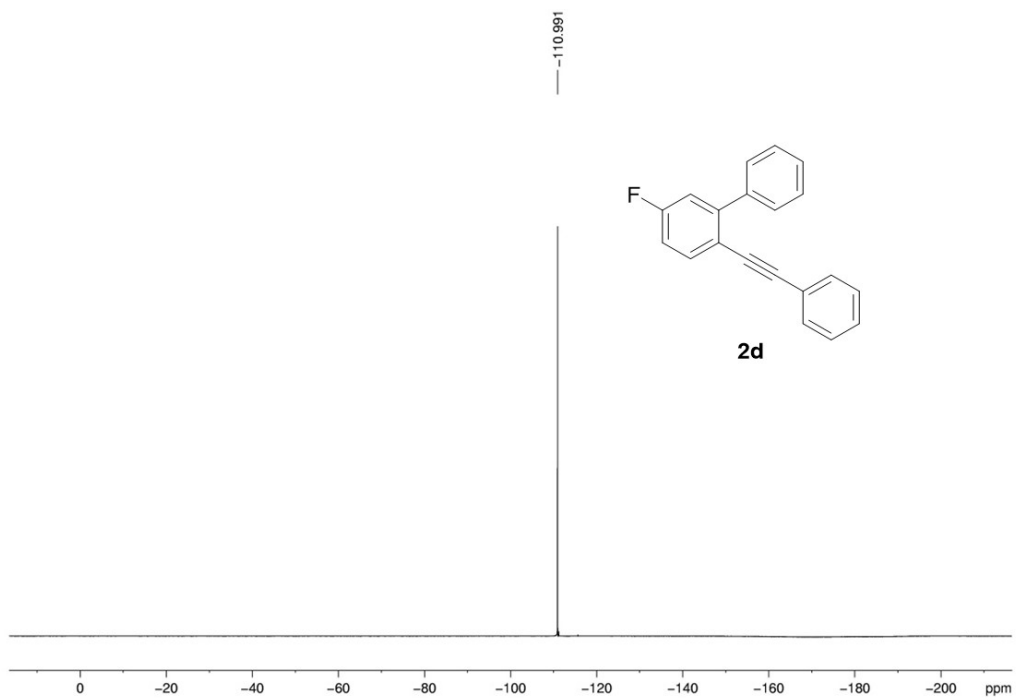

$^1\text{H}$  NMR (600 MHz,  $\text{CDCl}_3$ ) and  $^{13}\text{C}\{^1\text{H}\}$  NMR (150 MHz,  $\text{CDCl}_3$ ) of **2e**

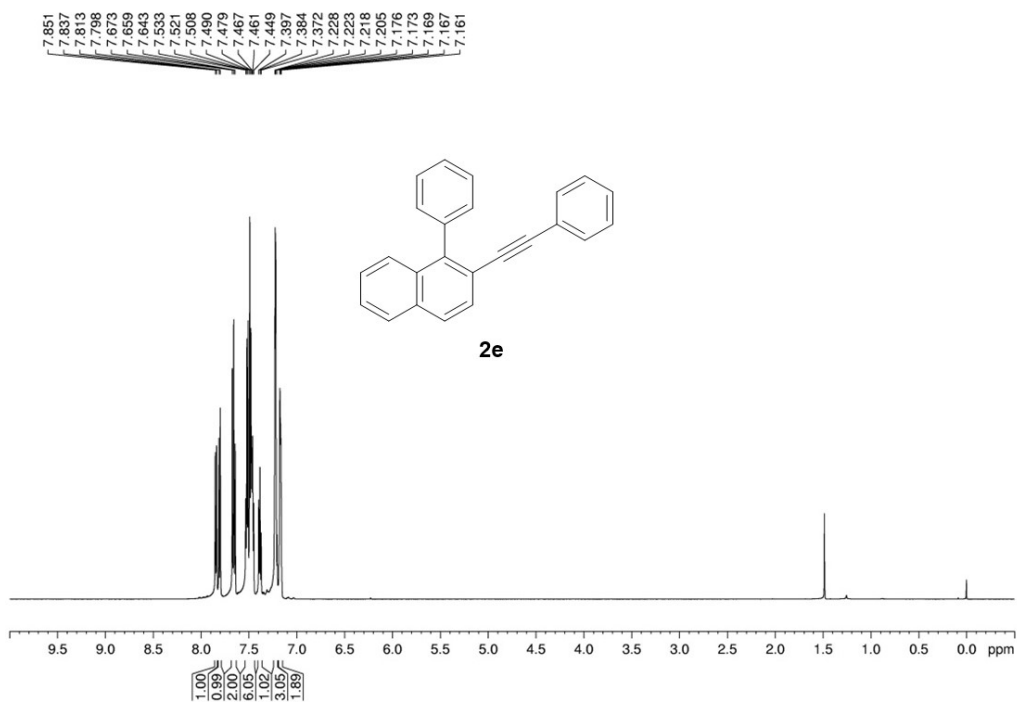

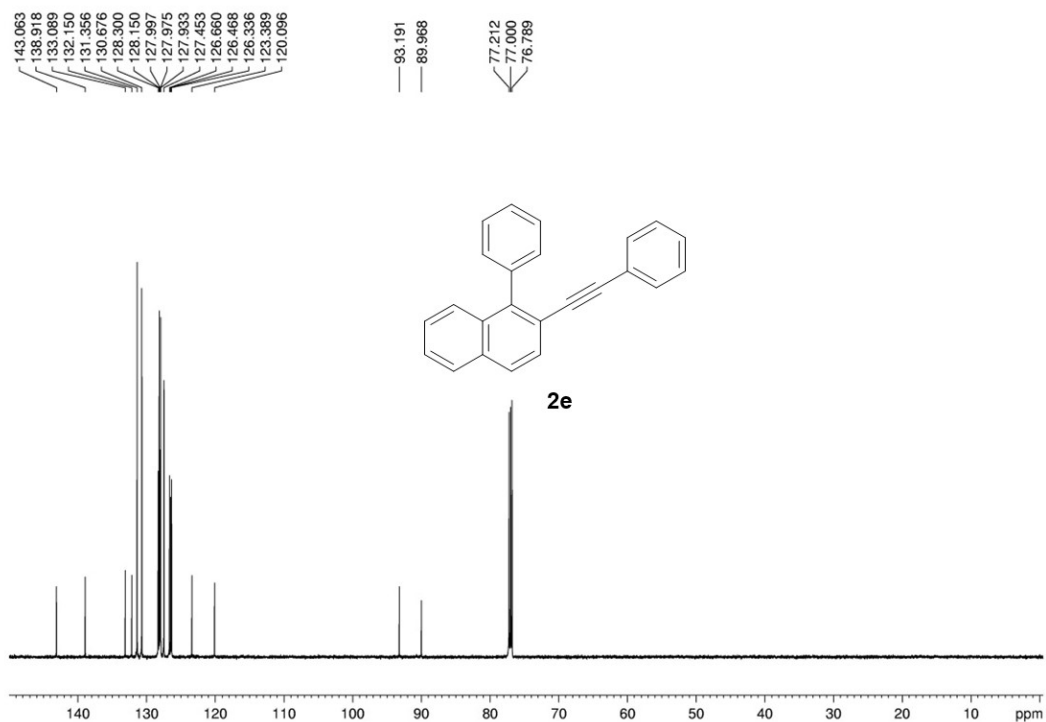

**<sup>1</sup>H NMR (600 MHz, CDCl<sub>3</sub>) and <sup>13</sup>C{<sup>1</sup>H} NMR (150 MHz, CDCl<sub>3</sub>) of 2f**

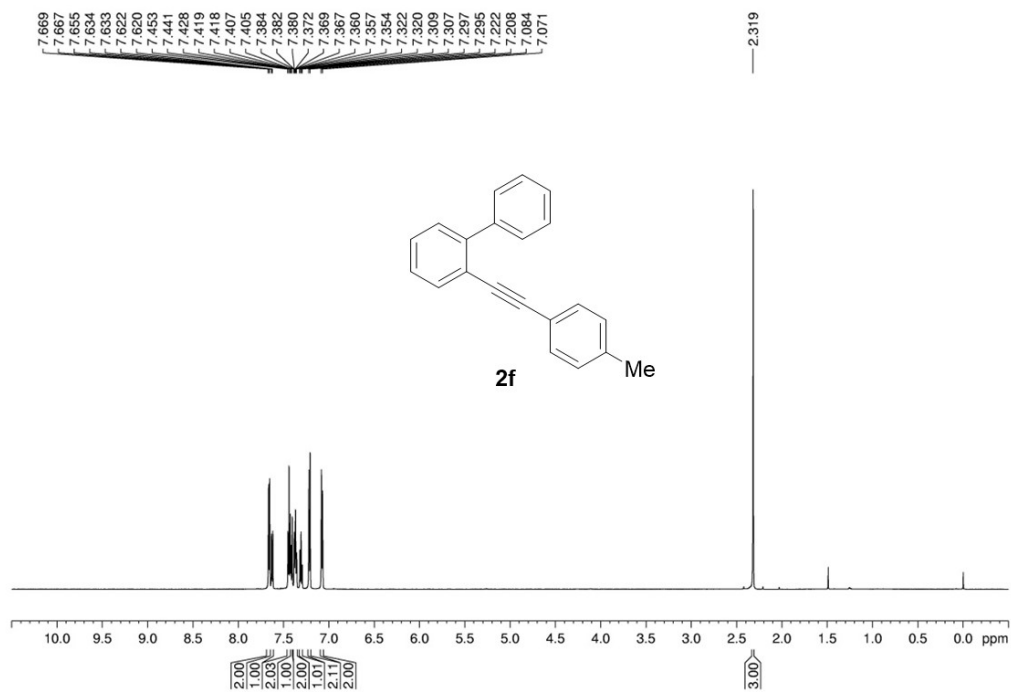

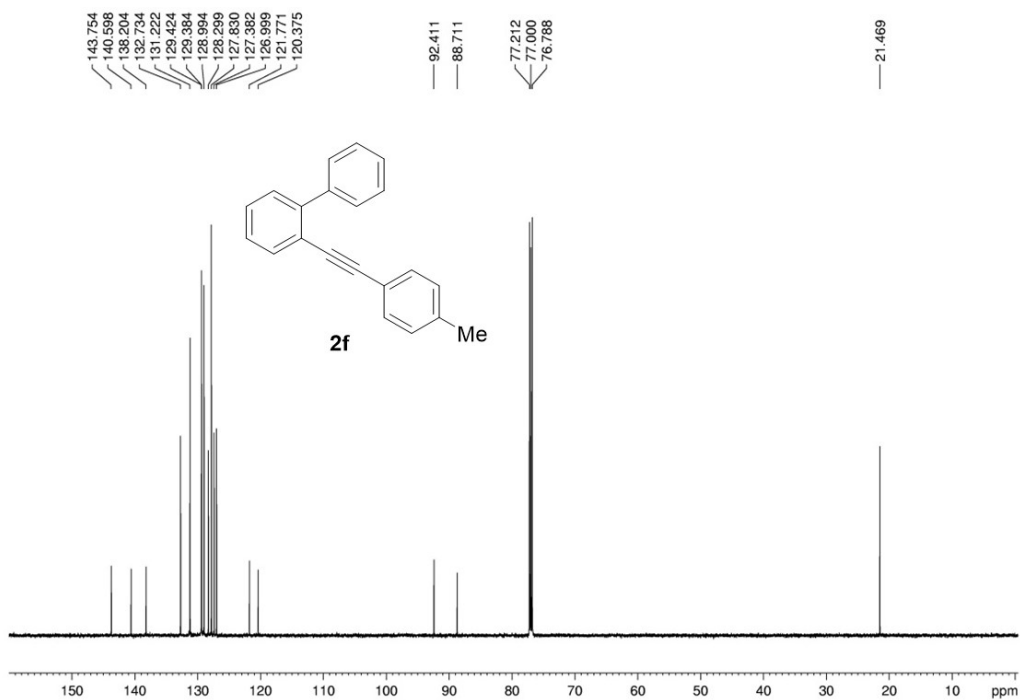

<sup>1</sup>H NMR (600 MHz, CDCl<sub>3</sub>), <sup>13</sup>C{<sup>1</sup>H} NMR (150 MHz, CDCl<sub>3</sub>) and <sup>19</sup>F{<sup>1</sup>H} NMR (565 MHz, CDCl<sub>3</sub>) of **2g**

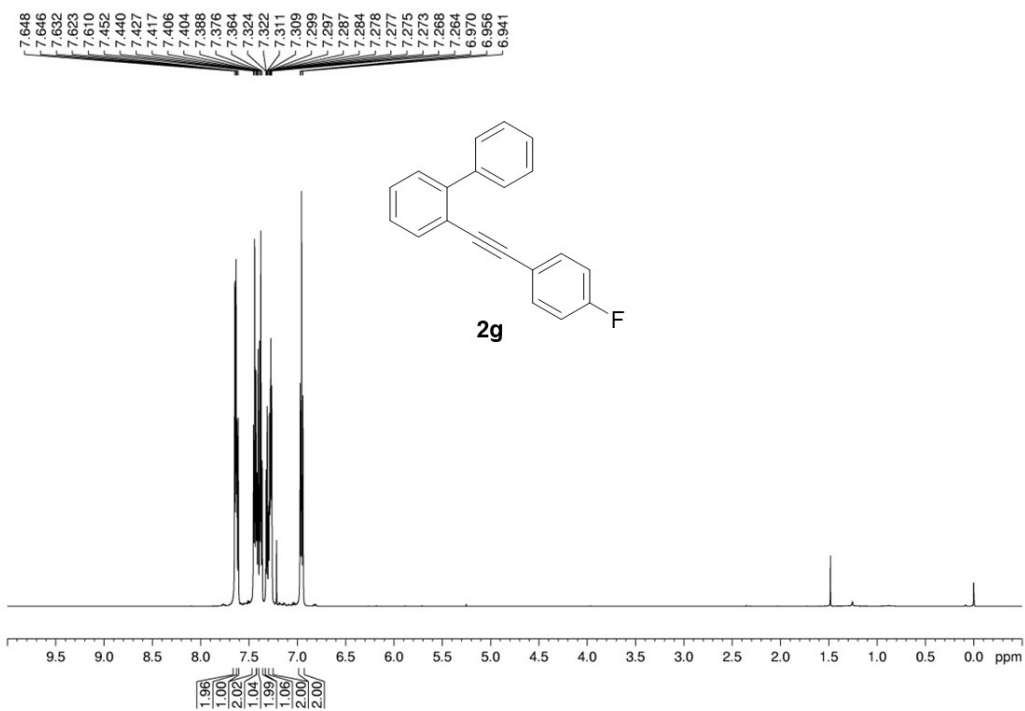



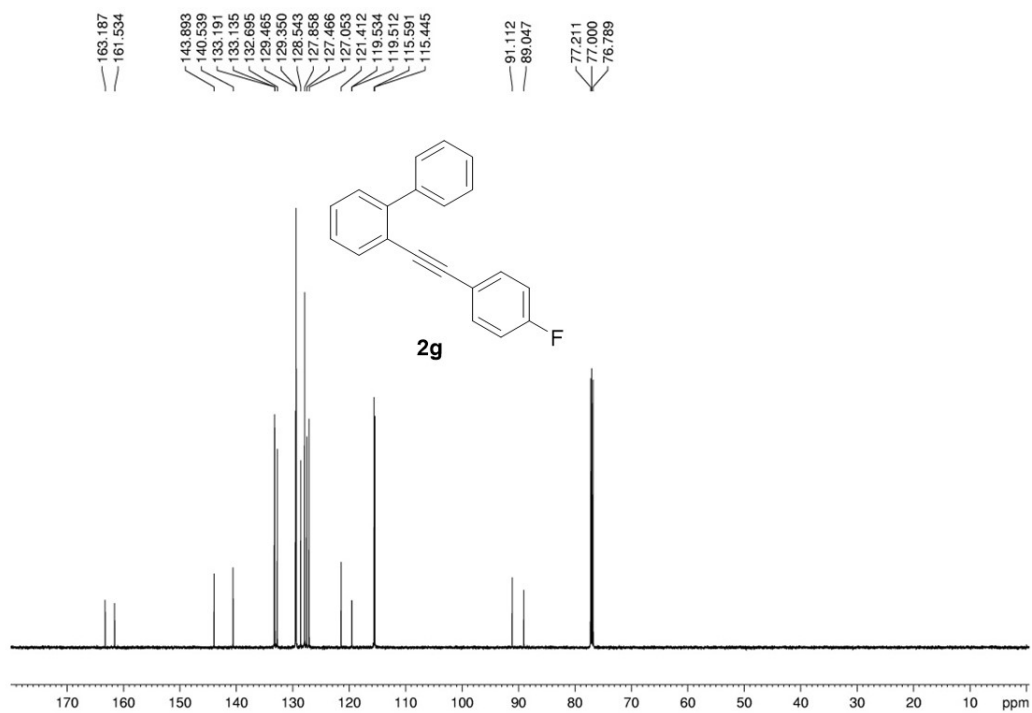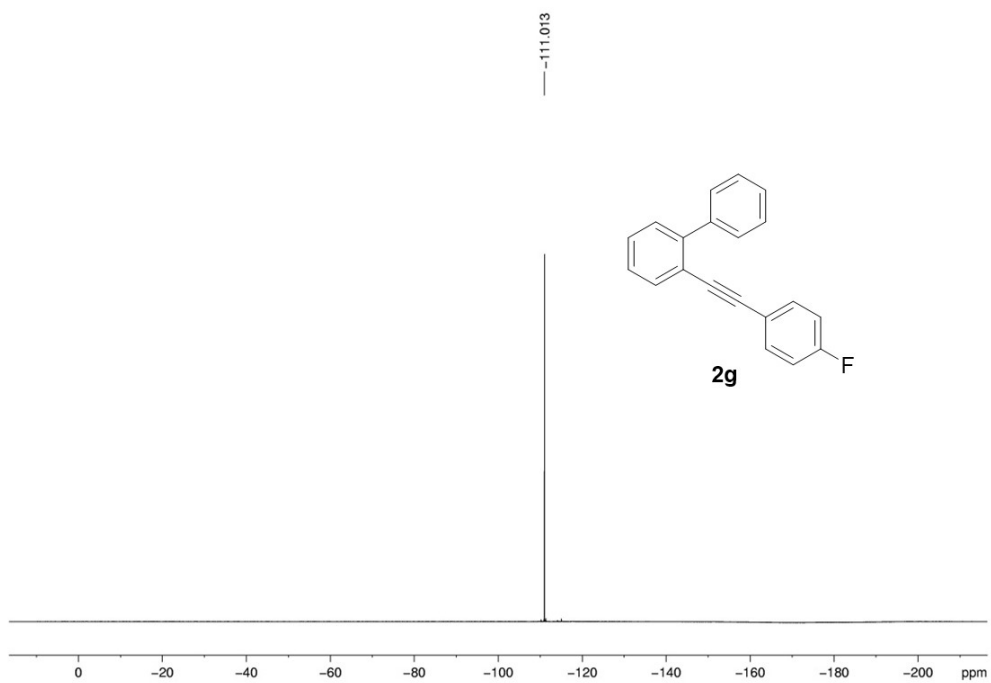

$^1\text{H}$  NMR (600 MHz,  $\text{CDCl}_3$ ) and  $^{13}\text{C}\{^1\text{H}\}$  NMR (150 MHz,  $\text{CDCl}_3$ ) of **2h**

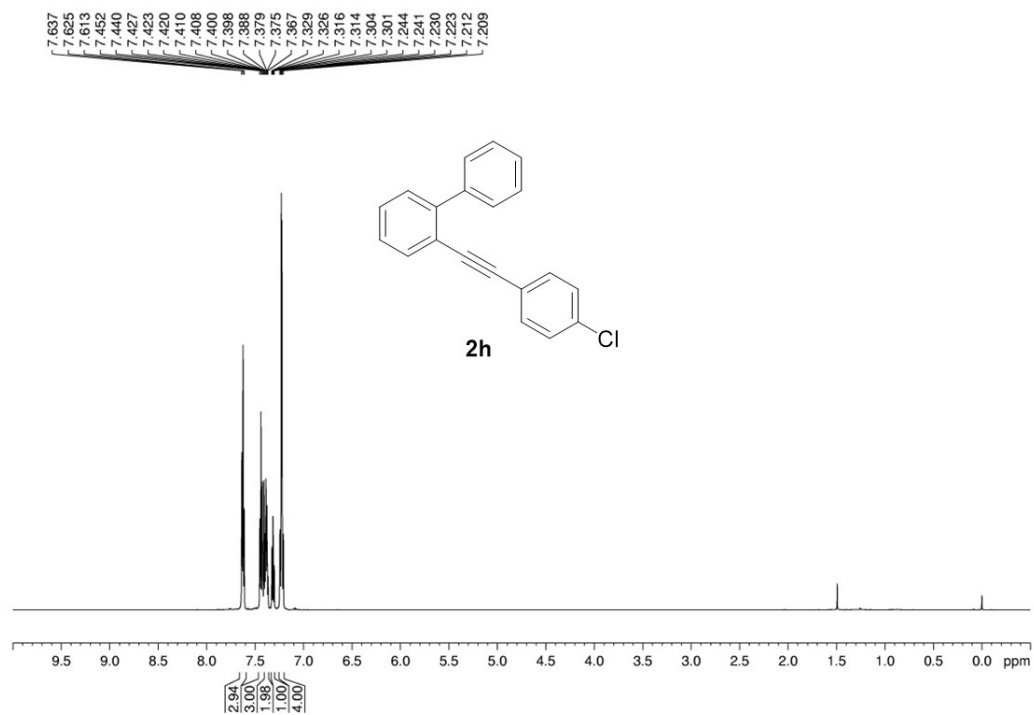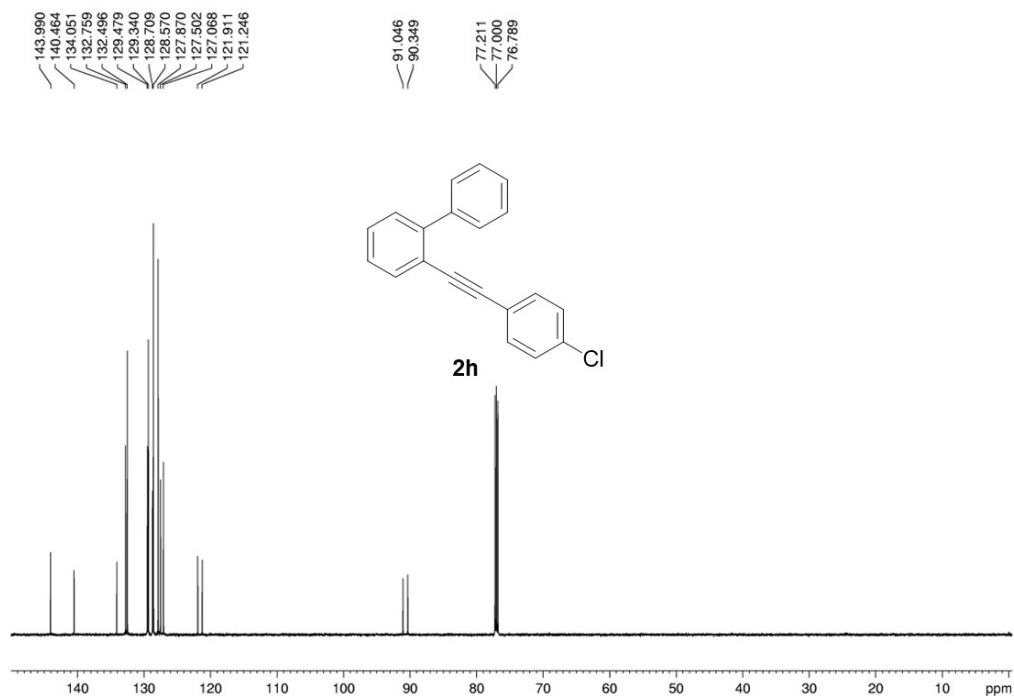

$^1\text{H}$  NMR (600 MHz,  $\text{CDCl}_3$ ) and  $^{13}\text{C}\{^1\text{H}\}$  NMR (150 MHz,  $\text{CDCl}_3$ ) of **2i**

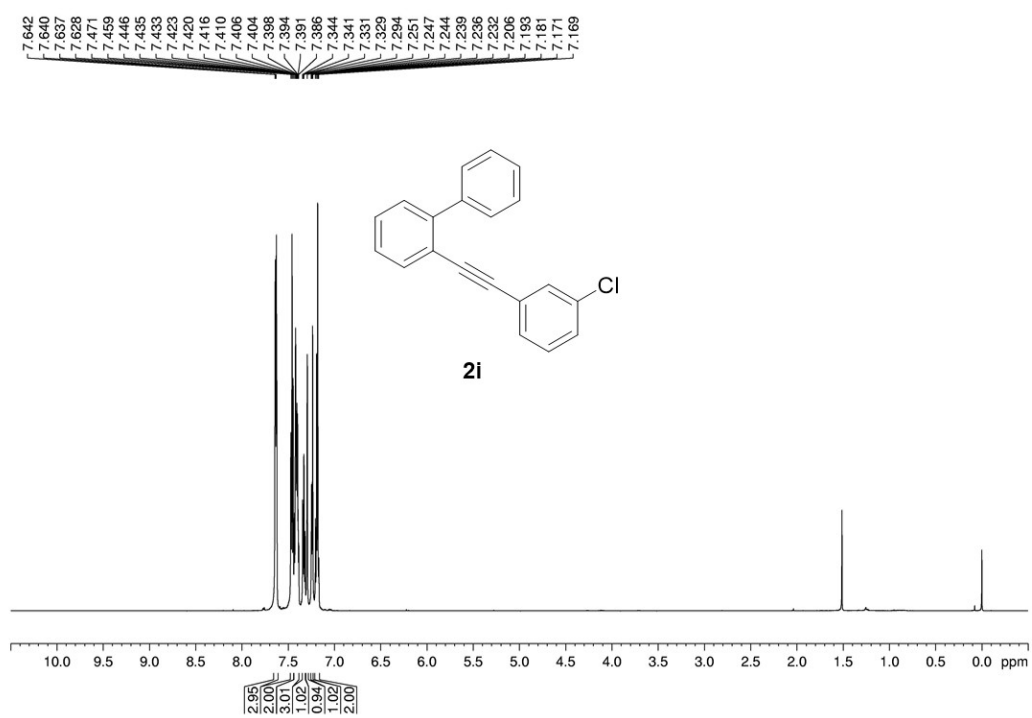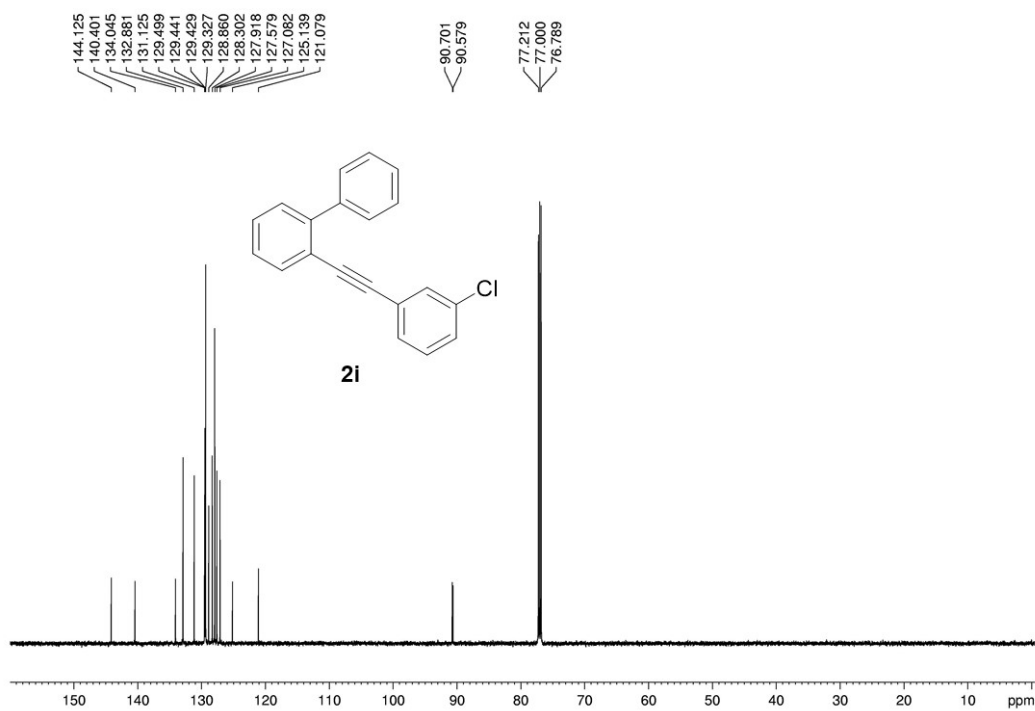

$^1\text{H}$  NMR (600 MHz,  $\text{CDCl}_3$ ) and  $^{13}\text{C}\{^1\text{H}\}$  NMR (150 MHz,  $\text{CDCl}_3$ ) of **2j**

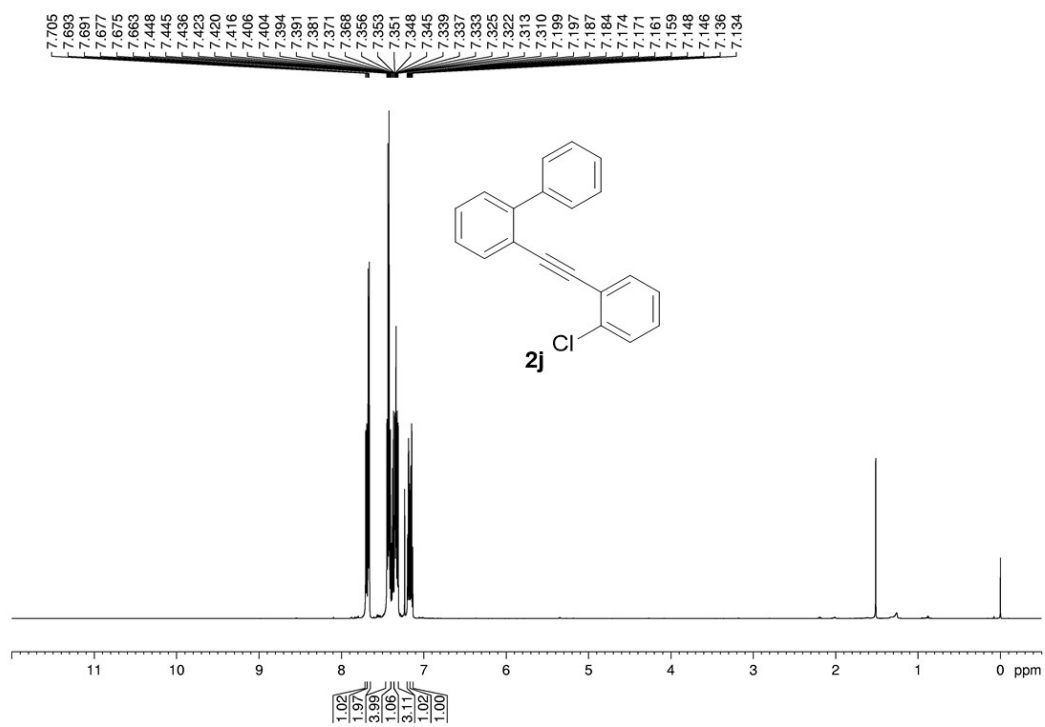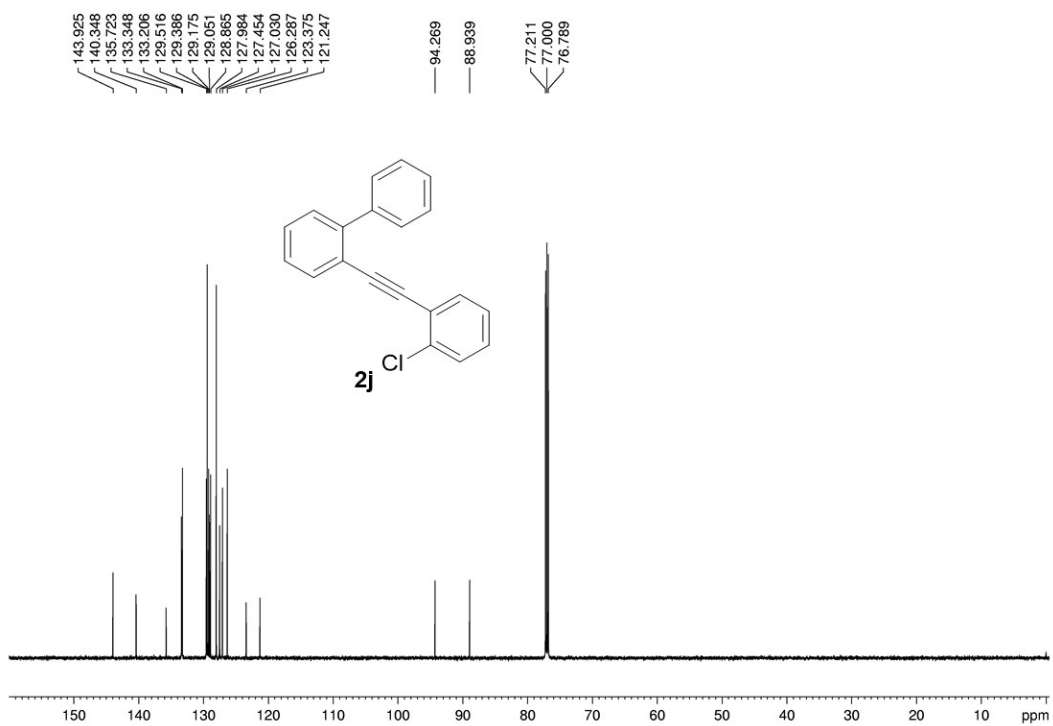

$^1\text{H}$  NMR (600 MHz,  $\text{CDCl}_3$ ) and  $^{13}\text{C}\{^1\text{H}\}$  NMR (150 MHz,  $\text{CDCl}_3$ ) of **2k**

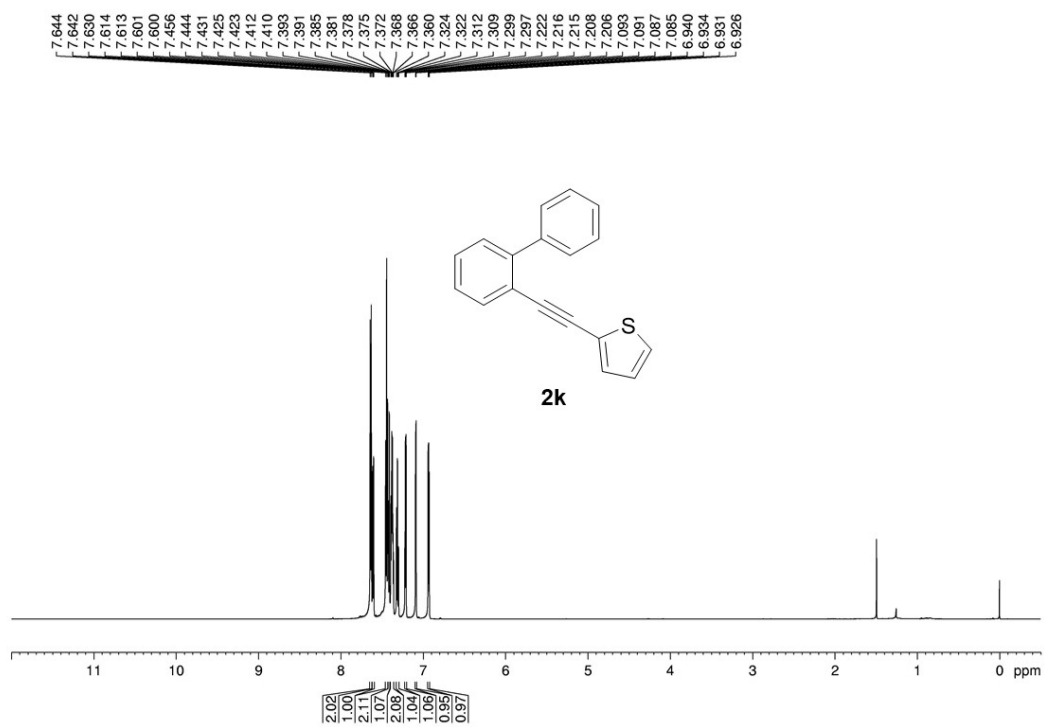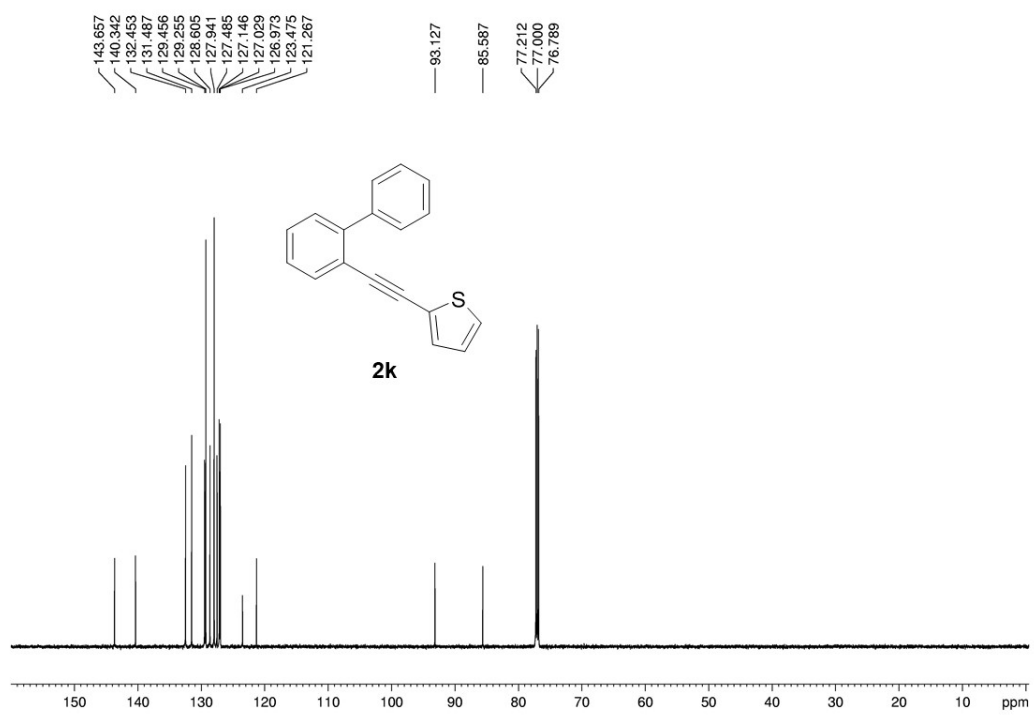

$^1\text{H}$  NMR (600 MHz,  $\text{CDCl}_3$ ) and  $^{13}\text{C}\{^1\text{H}\}$  NMR (150 MHz,  $\text{CDCl}_3$ ) of **21**

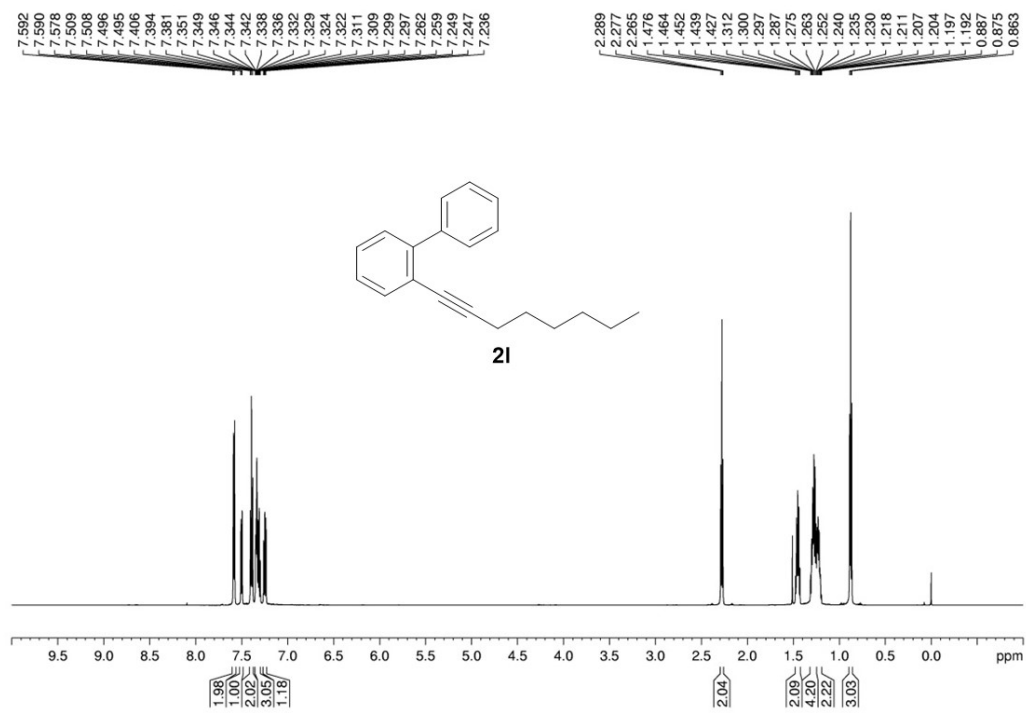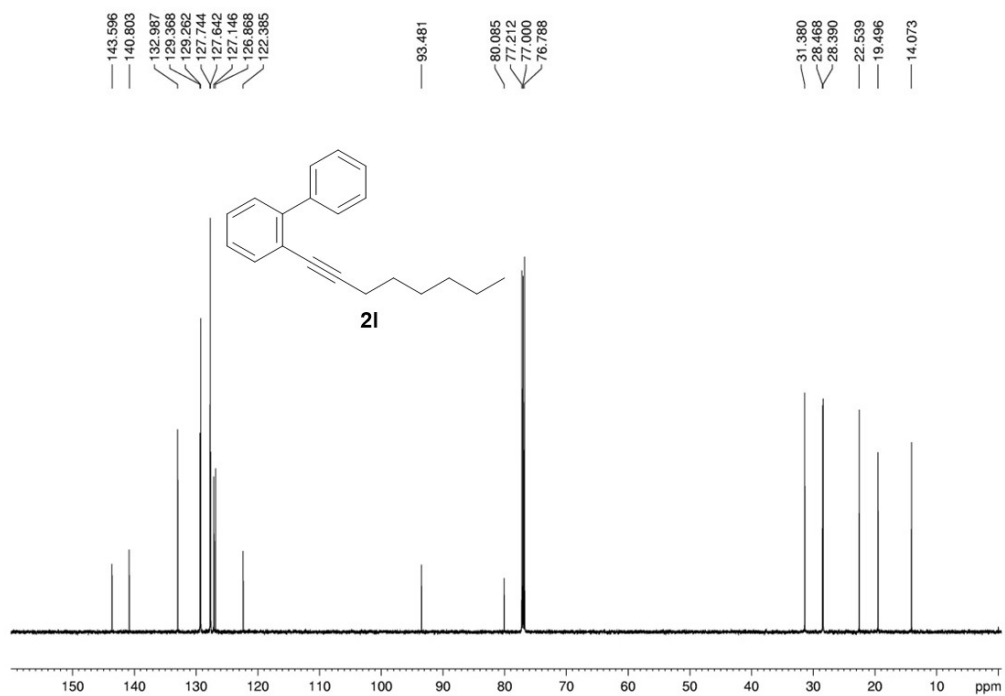

$^1\text{H}$  NMR (600 MHz,  $\text{CDCl}_3$ ) and  $^{13}\text{C}\{^1\text{H}\}$  NMR (150 MHz,  $\text{CDCl}_3$ ) of **2m**

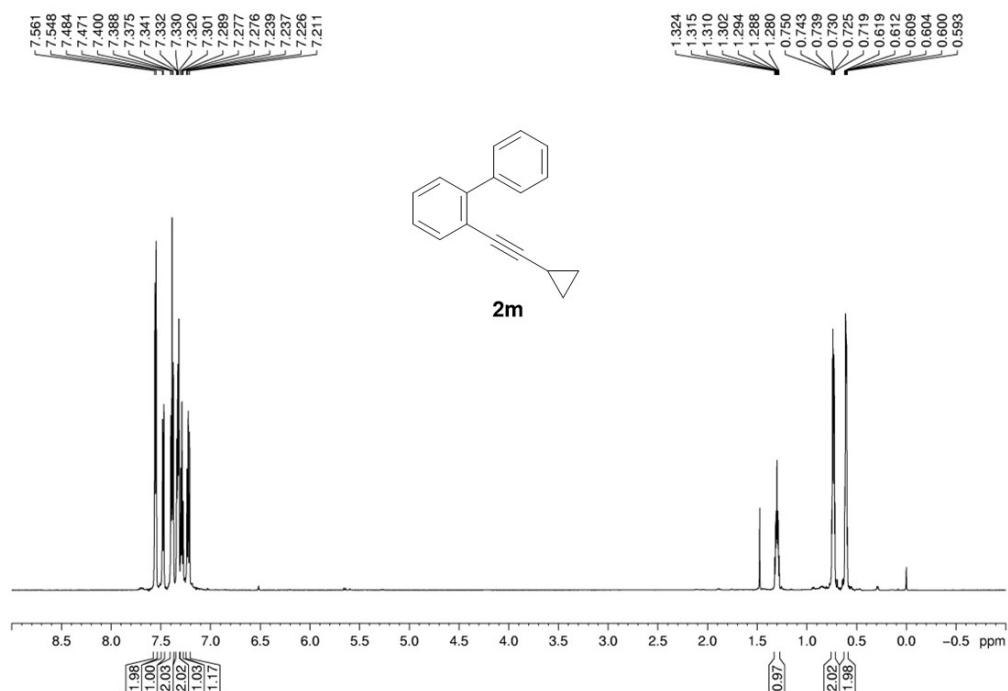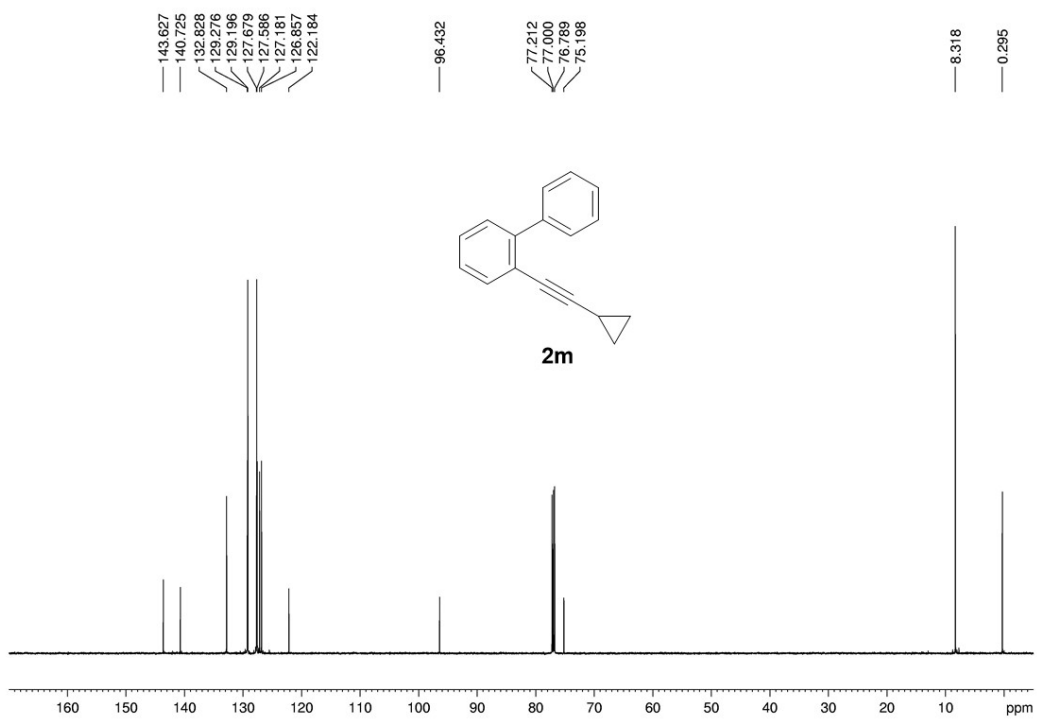

$^1\text{H}$  NMR (600 MHz,  $\text{CDCl}_3$ ) and  $^{13}\text{C}\{^1\text{H}\}$  NMR (150 MHz,  $\text{CDCl}_3$ ) of **2n**

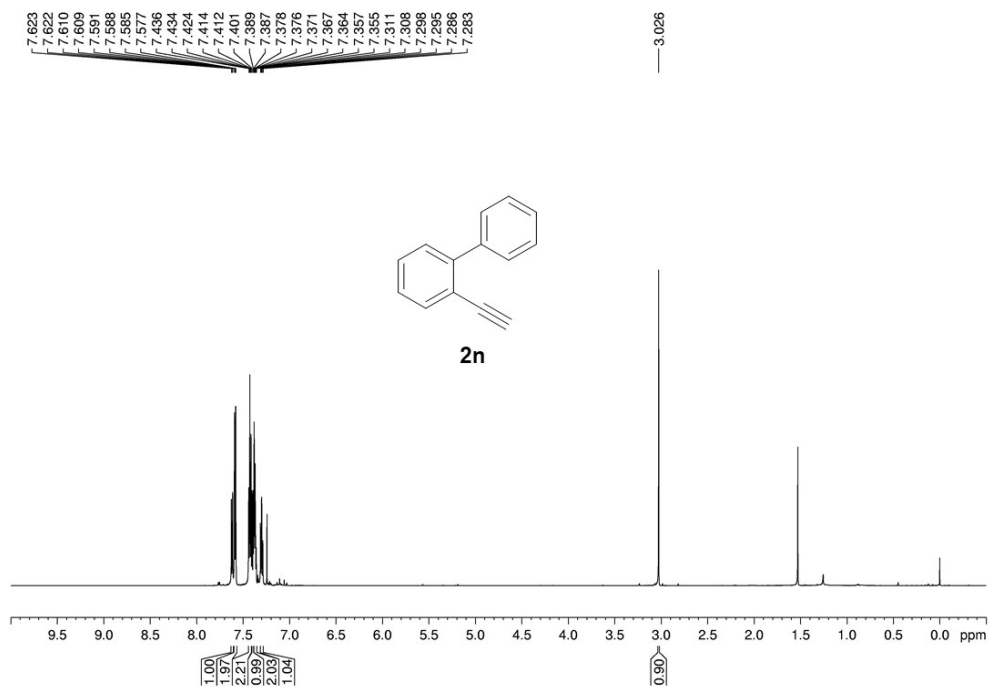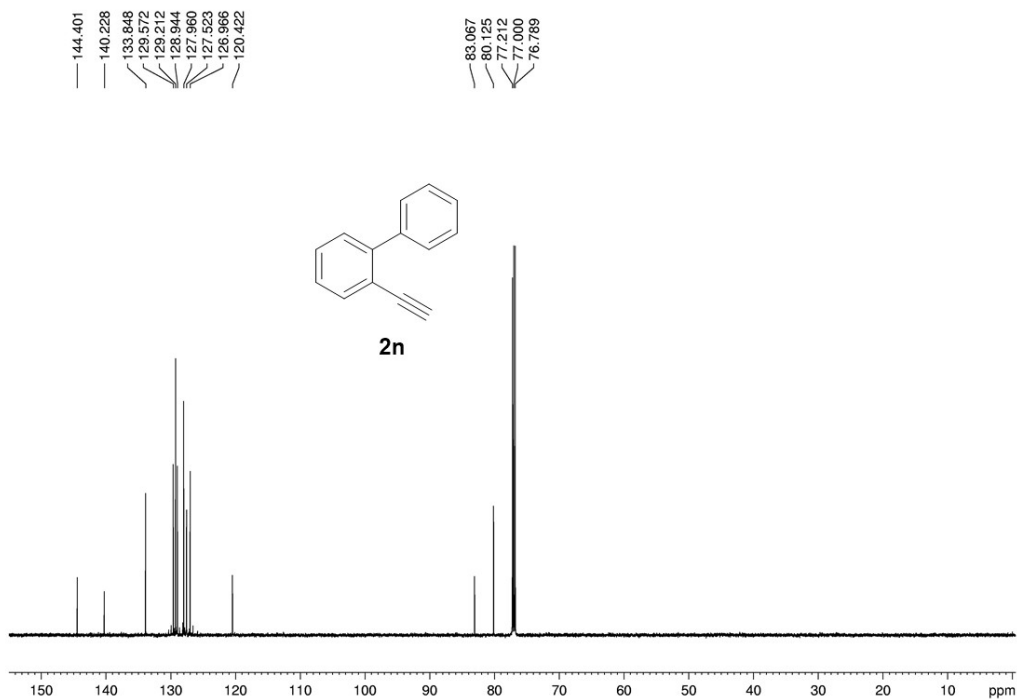



$^1\text{H}$  NMR (600 MHz,  $\text{CDCl}_3$ ) and  $^{13}\text{C}\{^1\text{H}\}$  NMR (150 MHz,  $\text{CDCl}_3$ ) of **2o**

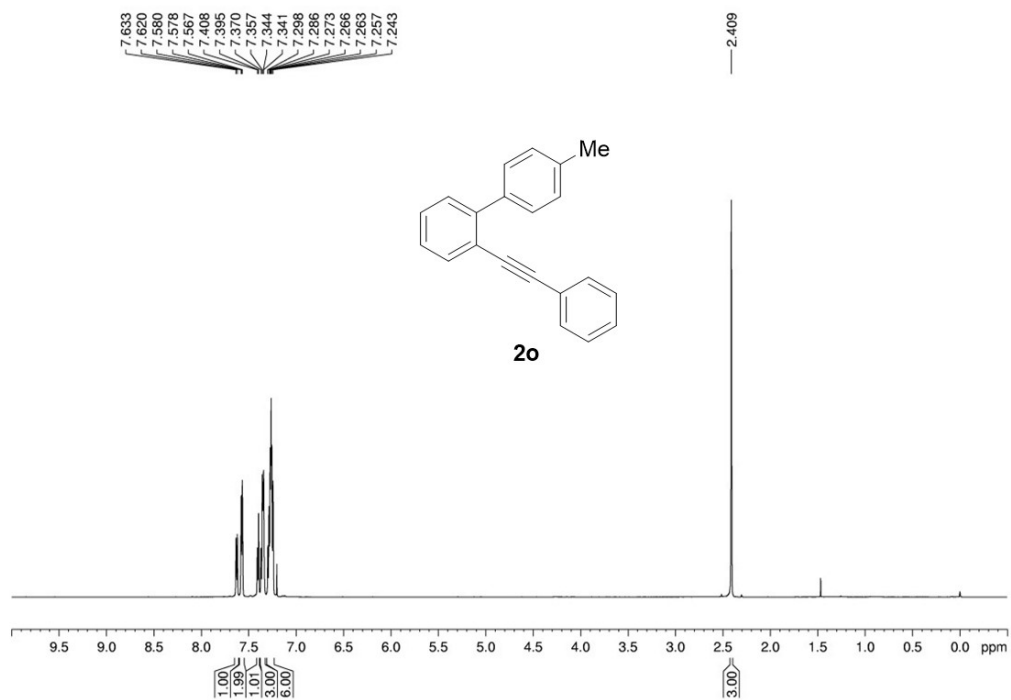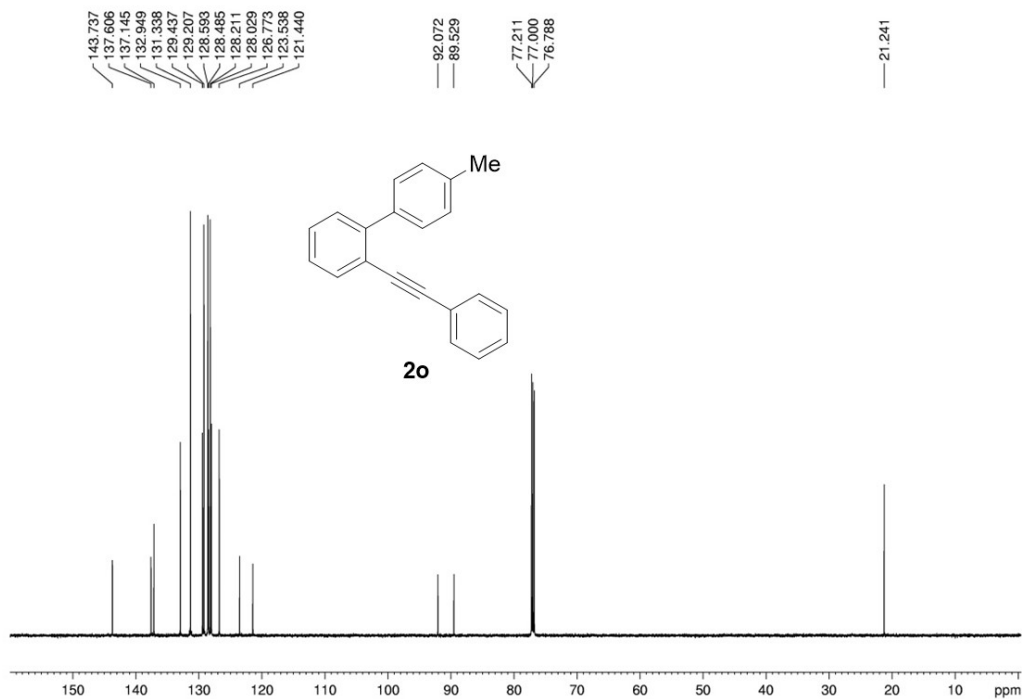

$^1\text{H}$  NMR (600 MHz,  $\text{CDCl}_3$ ) and  $^{13}\text{C}\{^1\text{H}\}$  NMR (150 MHz,  $\text{CDCl}_3$ ) of **2p**

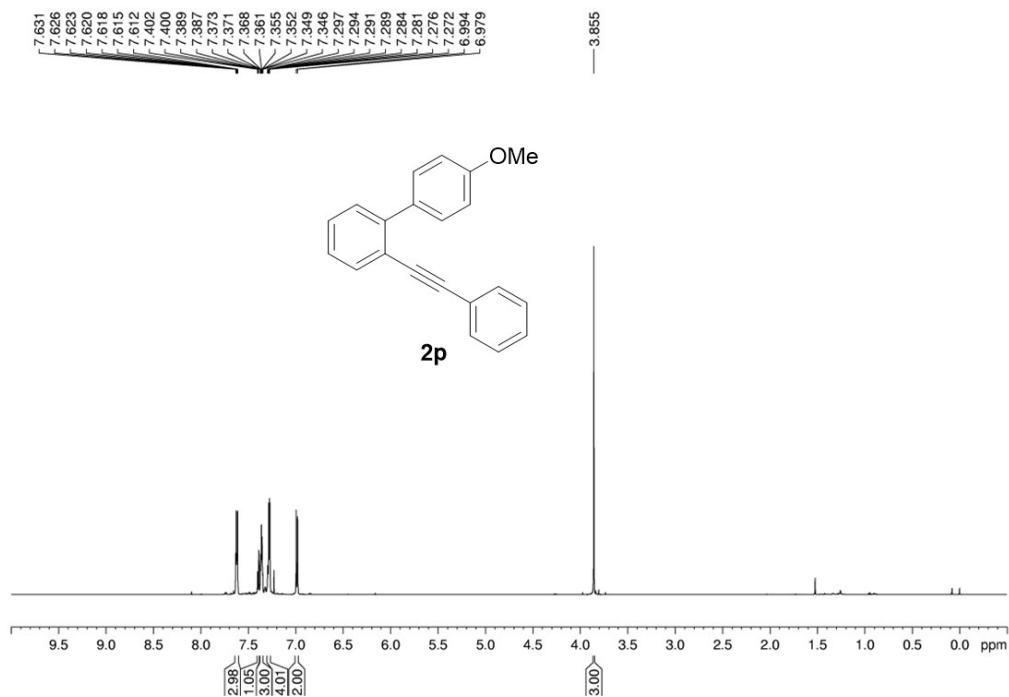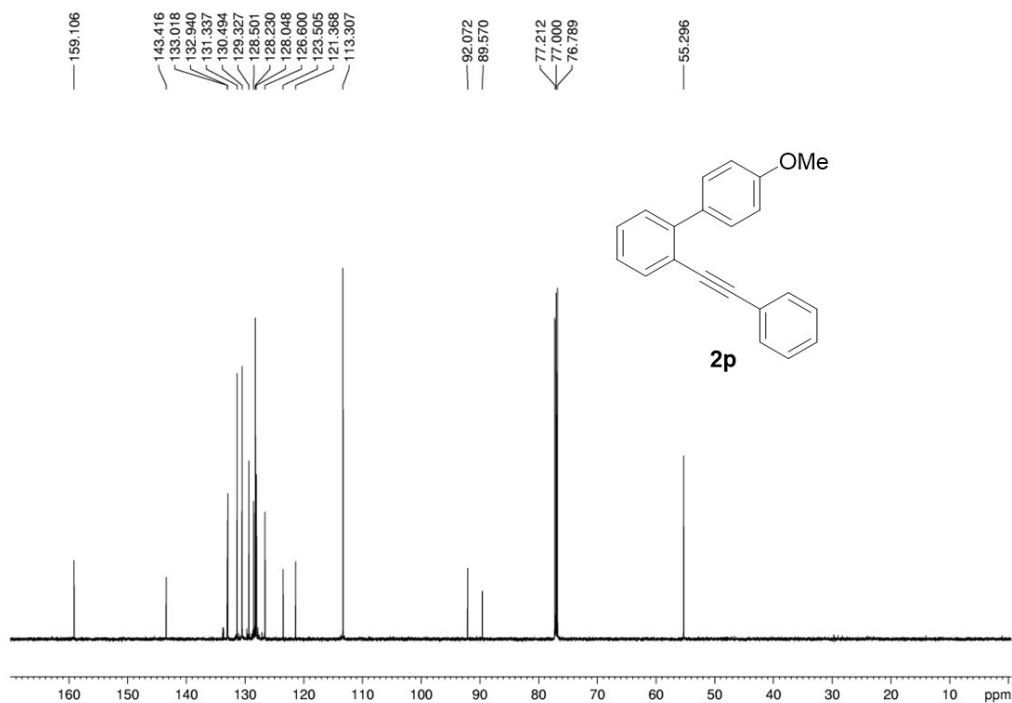

$^1\text{H}$  NMR (600 MHz,  $\text{CDCl}_3$ ),  $^{13}\text{C}\{^1\text{H}\}$  NMR (150 MHz,  $\text{CDCl}_3$ ) and  $^{19}\text{F}\{^1\text{H}\}$  NMR (565 MHz,  $\text{CDCl}_3$ ) of **2q**

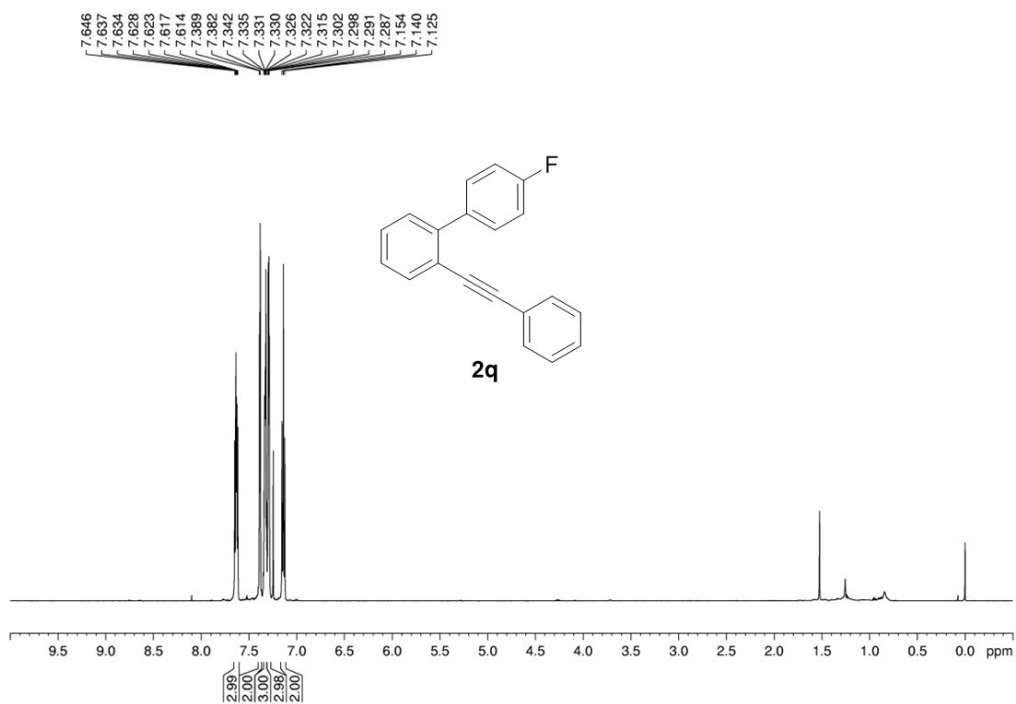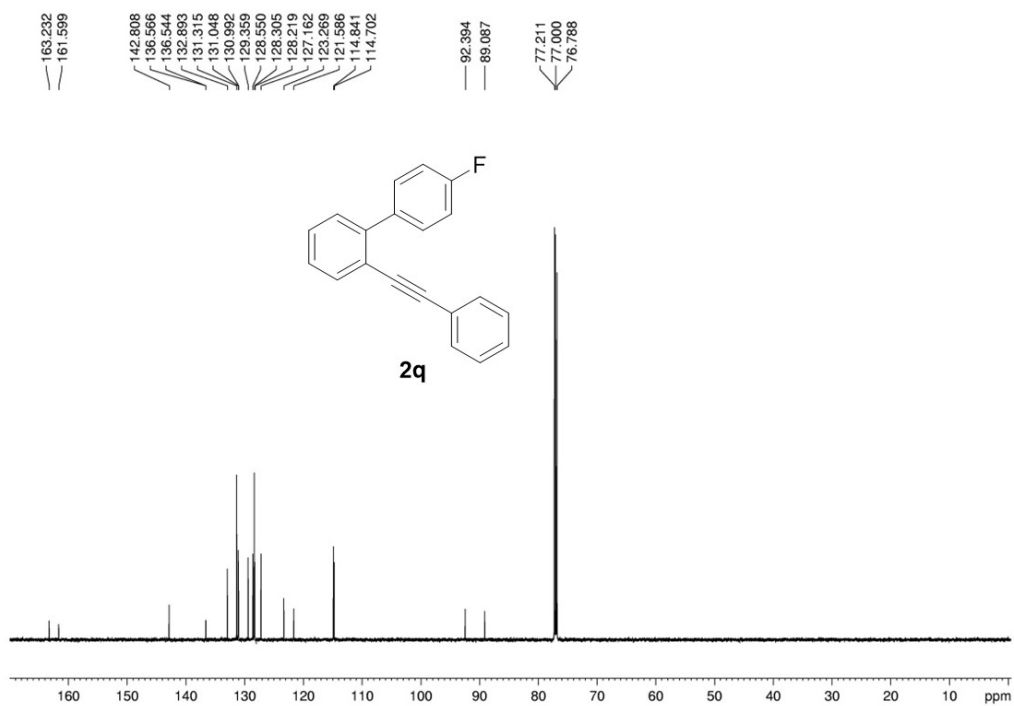

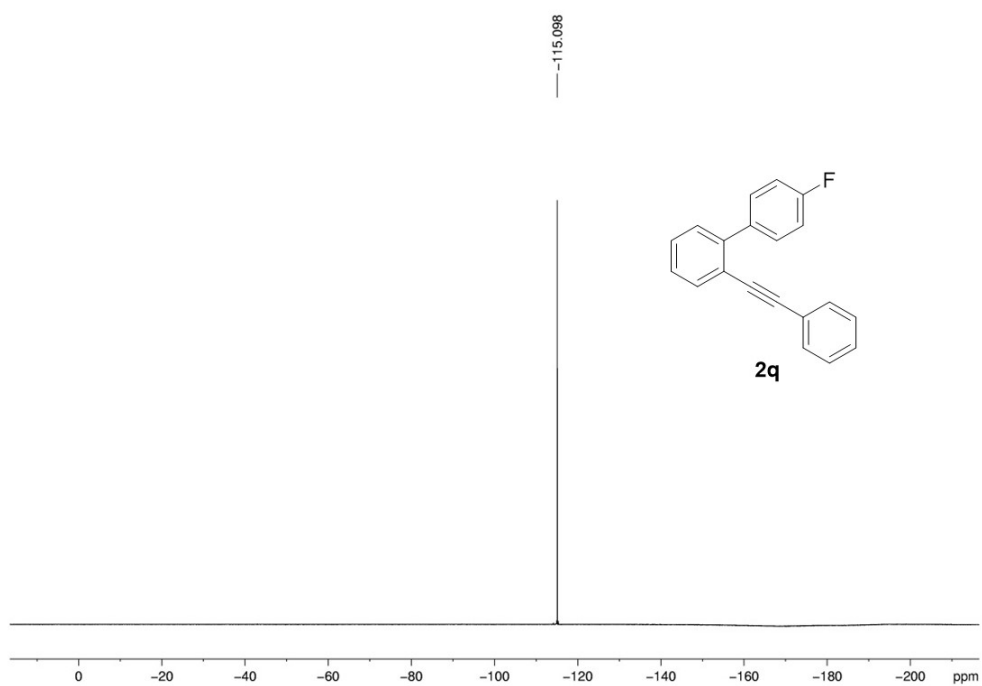

$^1\text{H}$  NMR (600 MHz,  $\text{CDCl}_3$ ) and  $^{13}\text{C}\{^1\text{H}\}$  NMR (150 MHz,  $\text{CDCl}_3$ ) of **2r**

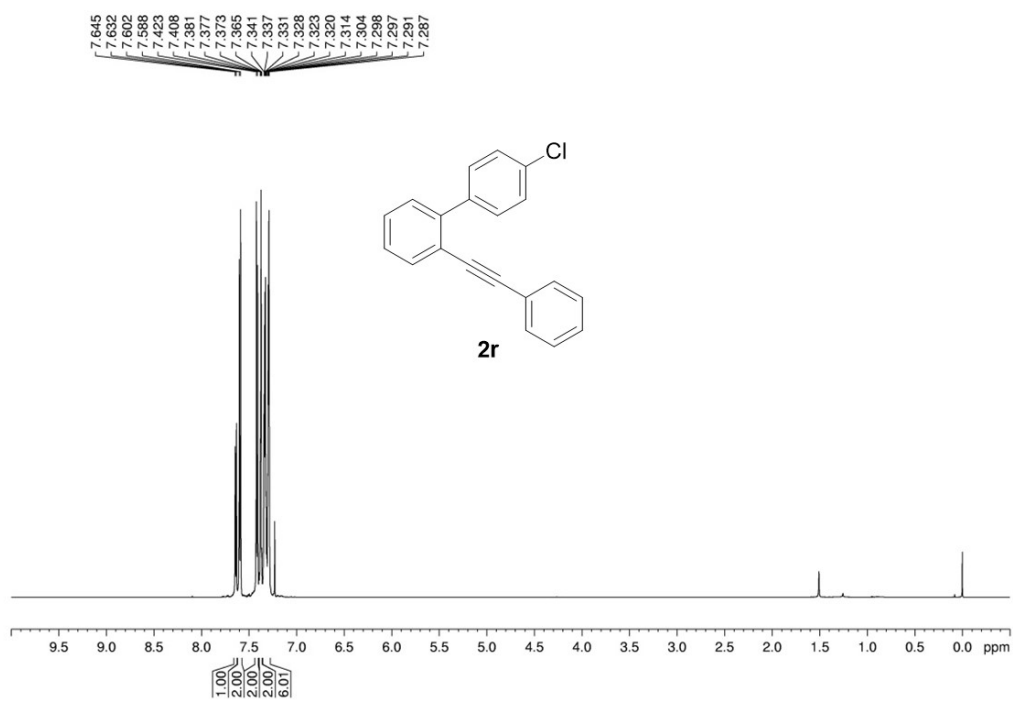

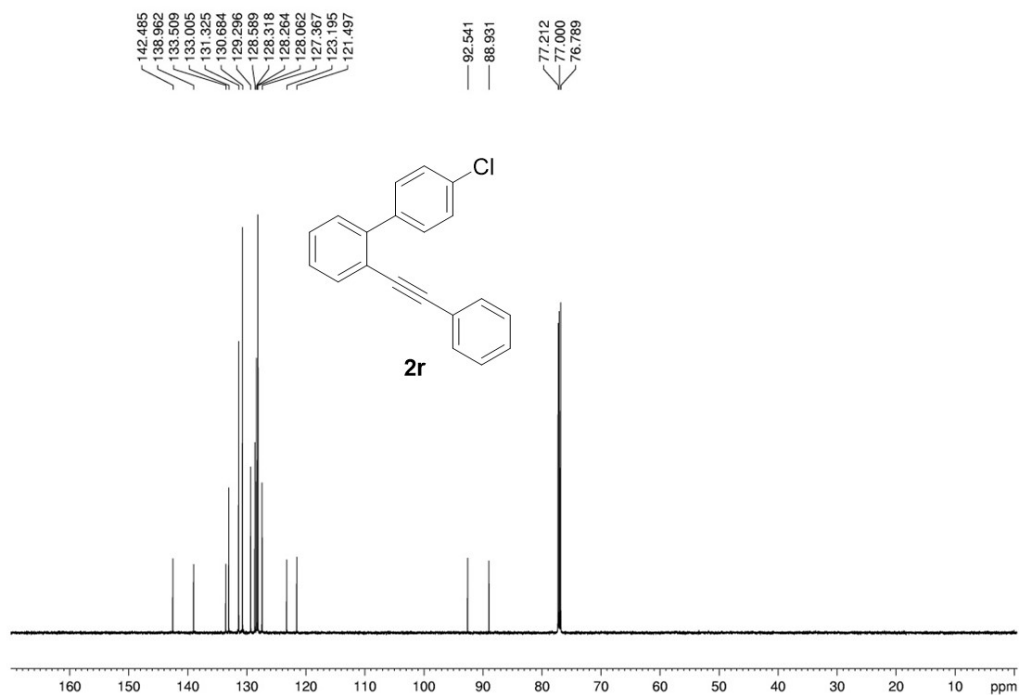

$^1\text{H}$  NMR (600 MHz,  $\text{CDCl}_3$ ) and  $^{13}\text{C}\{^1\text{H}\}$  NMR (150 MHz,  $\text{CDCl}_3$ ) of **2s**

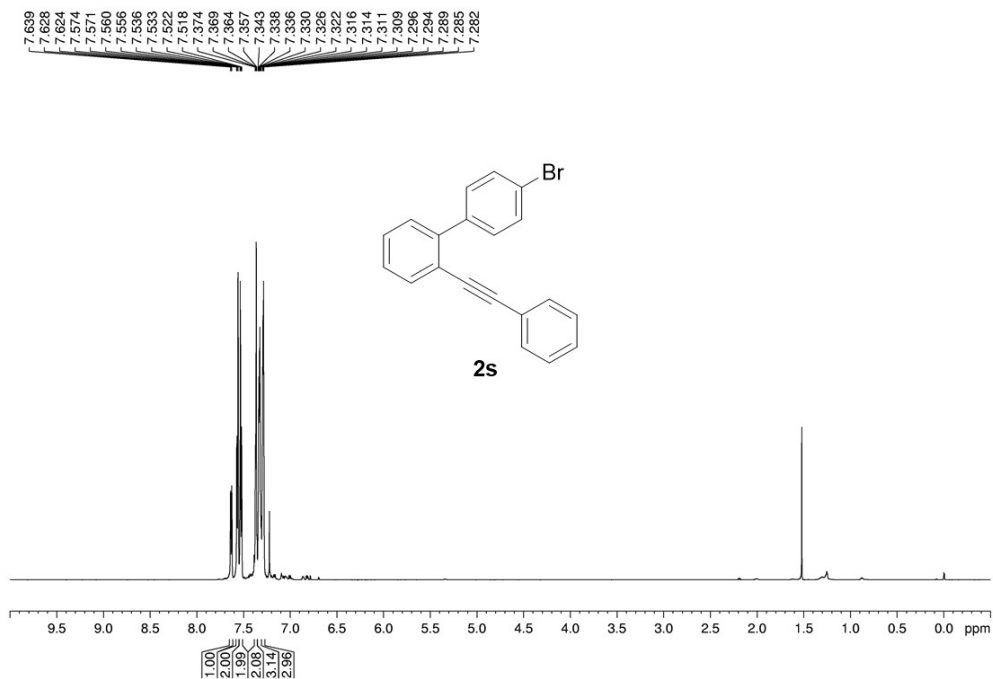

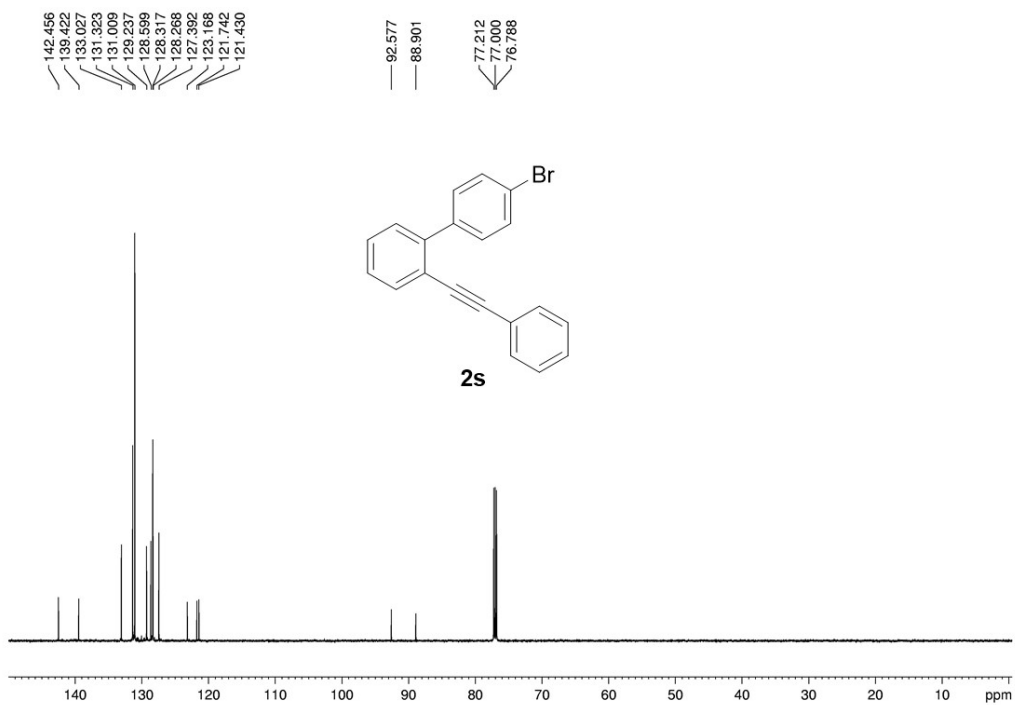

<sup>1</sup>H NMR (600 MHz, CDCl<sub>3</sub>) and <sup>13</sup>C{<sup>1</sup>H} NMR (150 MHz, CDCl<sub>3</sub>) of **2t**

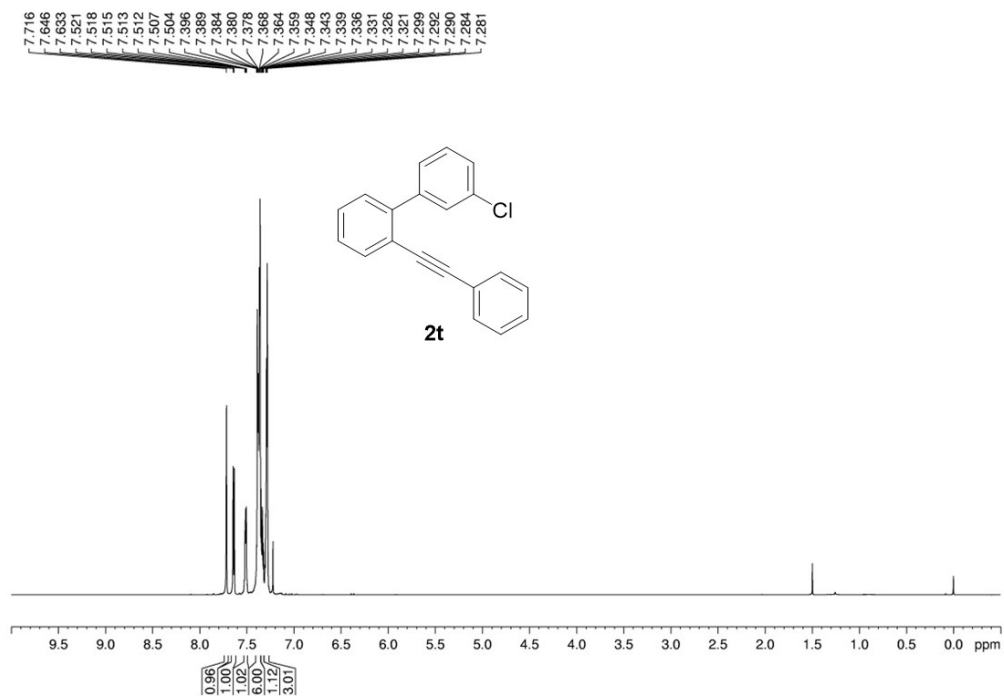

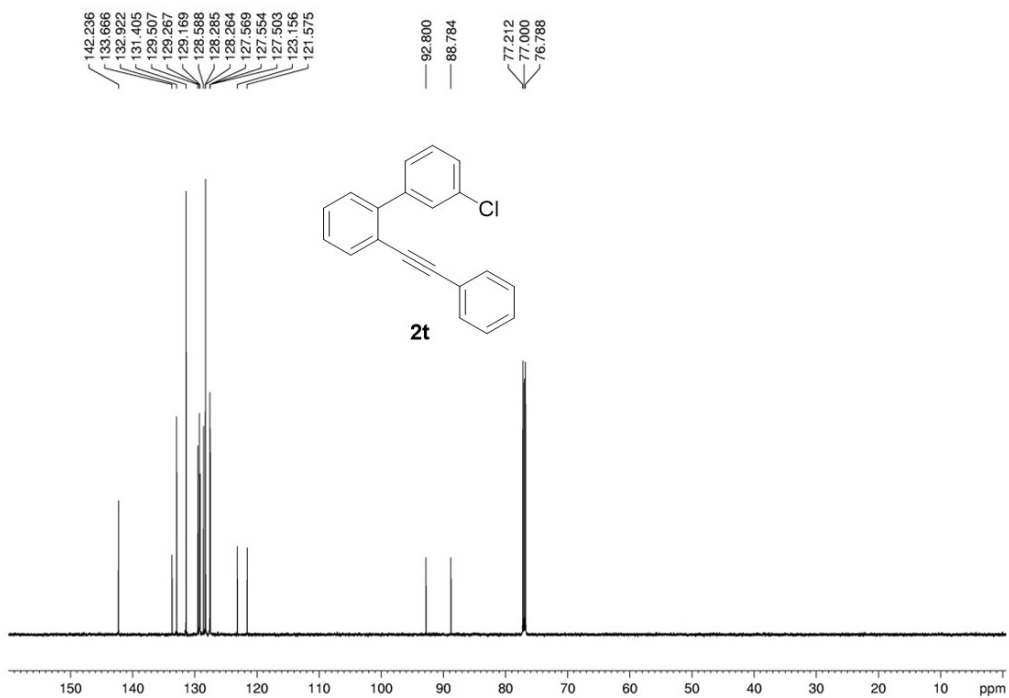

**<sup>1</sup>H NMR (600 MHz, CDCl<sub>3</sub>) and <sup>13</sup>C{<sup>1</sup>H} NMR (150 MHz, CDCl<sub>3</sub>) of 2u**

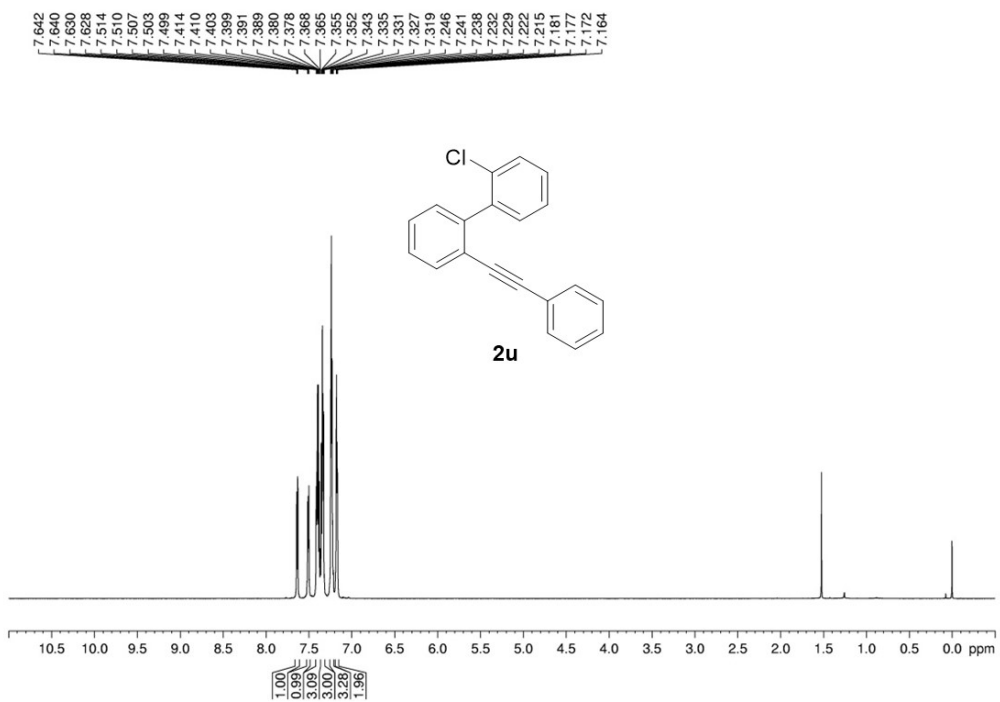

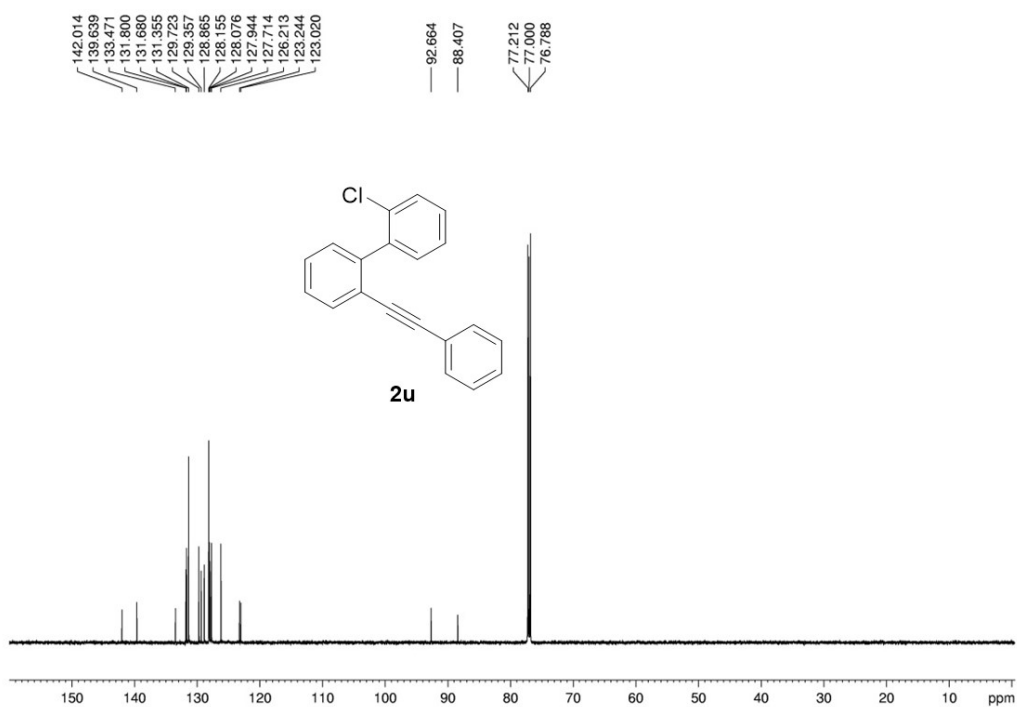

$^1\text{H}$  NMR (600 MHz,  $\text{CDCl}_3$ ) and  $^{13}\text{C}\{^1\text{H}\}$  NMR (150 MHz,  $\text{CDCl}_3$ ) of **3a**

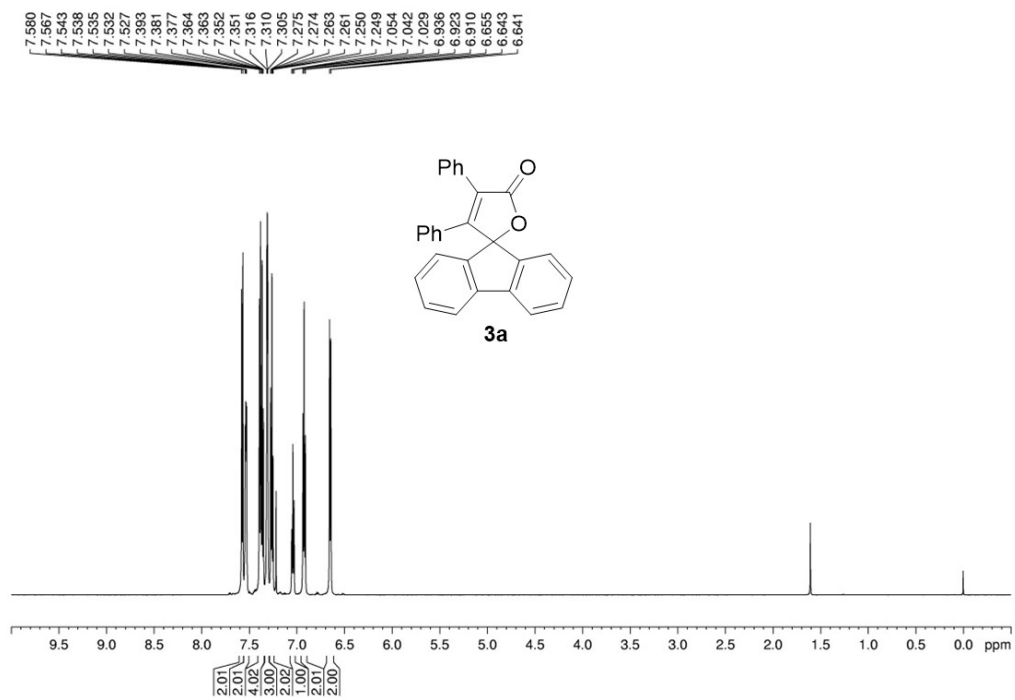



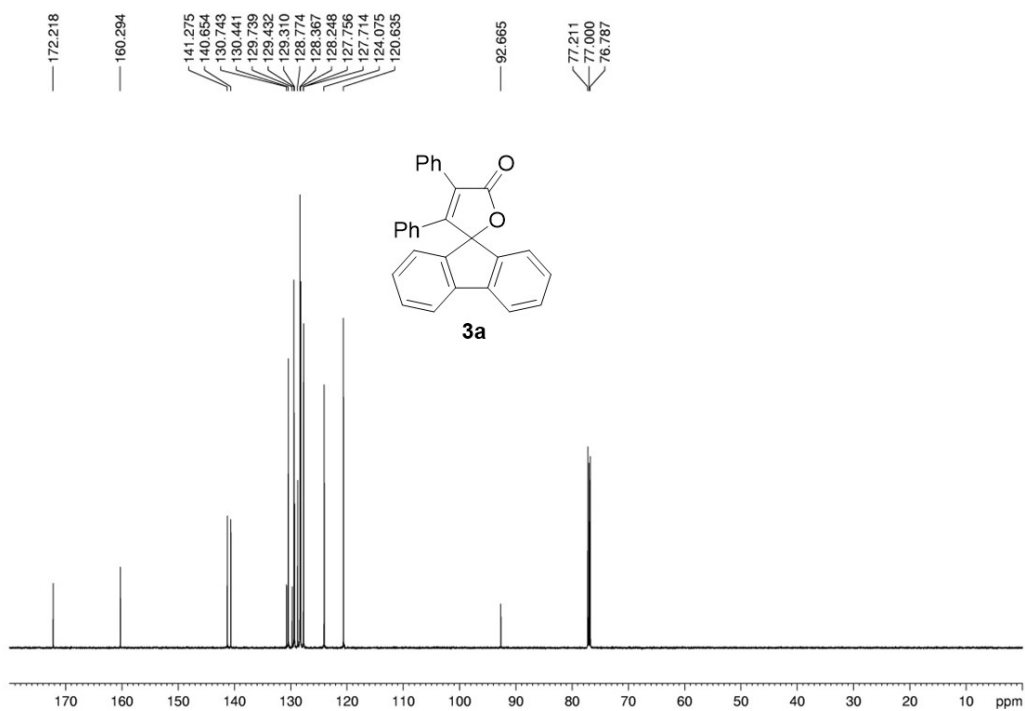

<sup>1</sup>H NMR (600 MHz, CDCl<sub>3</sub>) and <sup>13</sup>C{<sup>1</sup>H} NMR (150 MHz, CDCl<sub>3</sub>) of **3b**

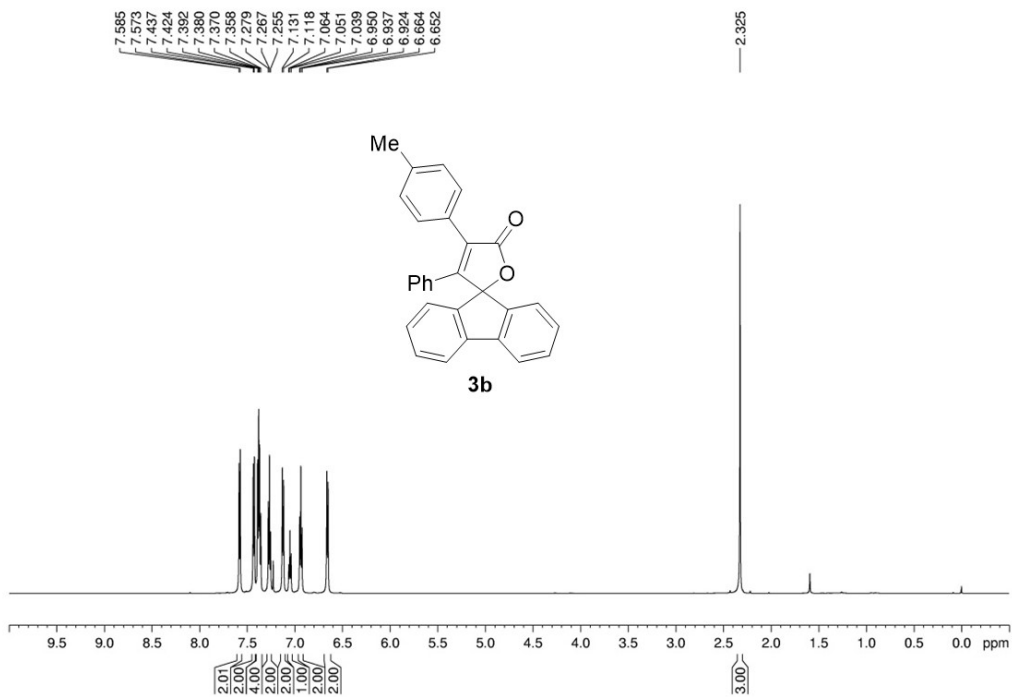

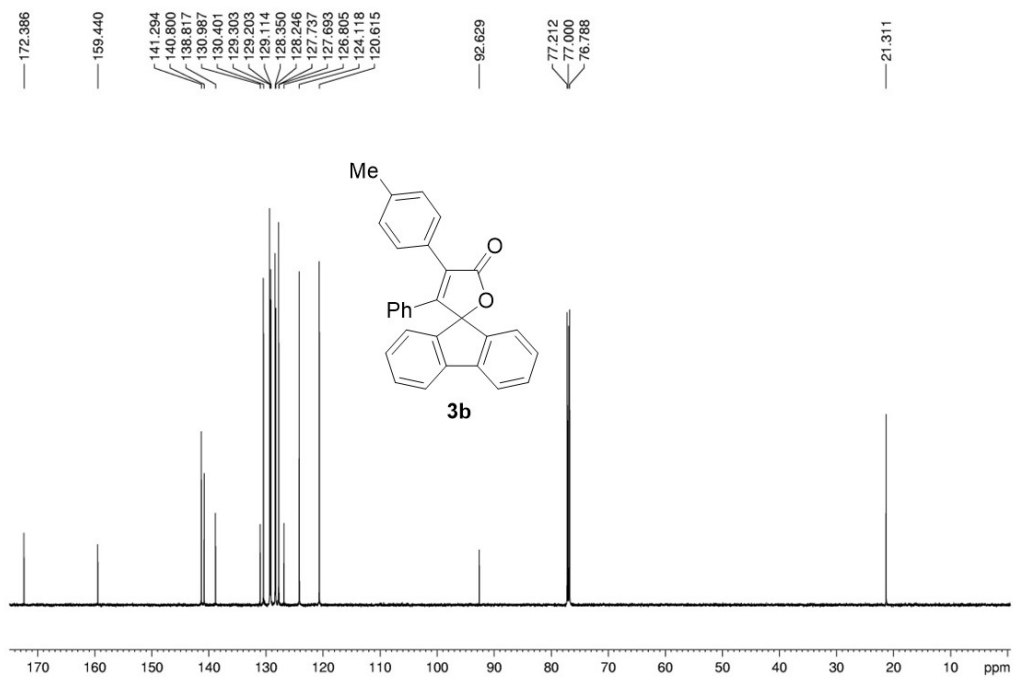

$^1\text{H}$  NMR (600 MHz,  $\text{CDCl}_3$ ) and  $^{13}\text{C}\{^1\text{H}\}$  NMR (150 MHz,  $\text{CDCl}_3$ ) of **3c**

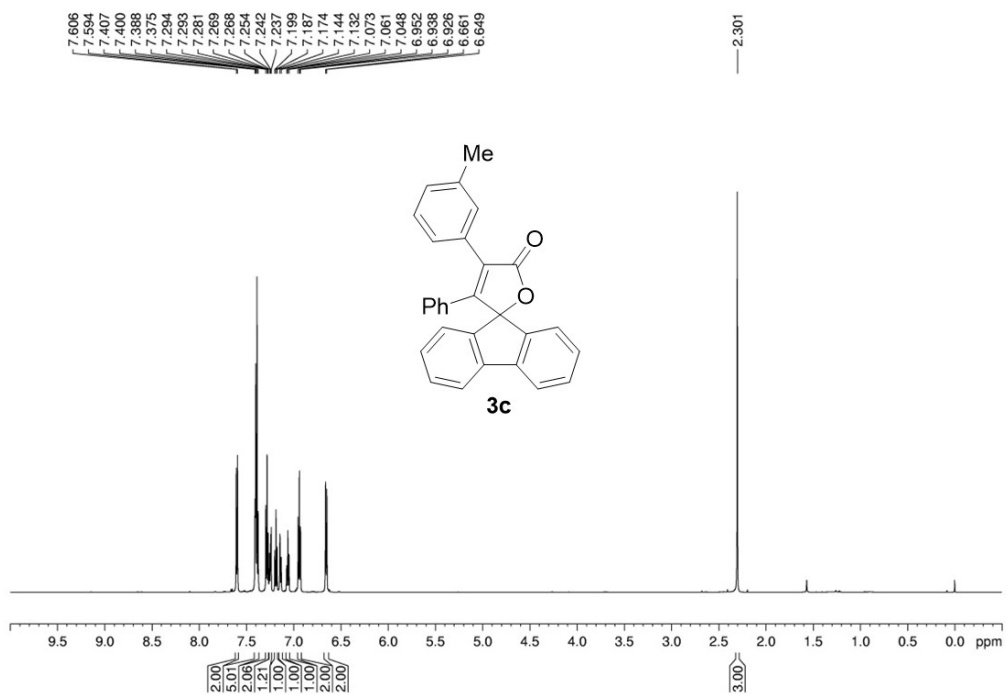

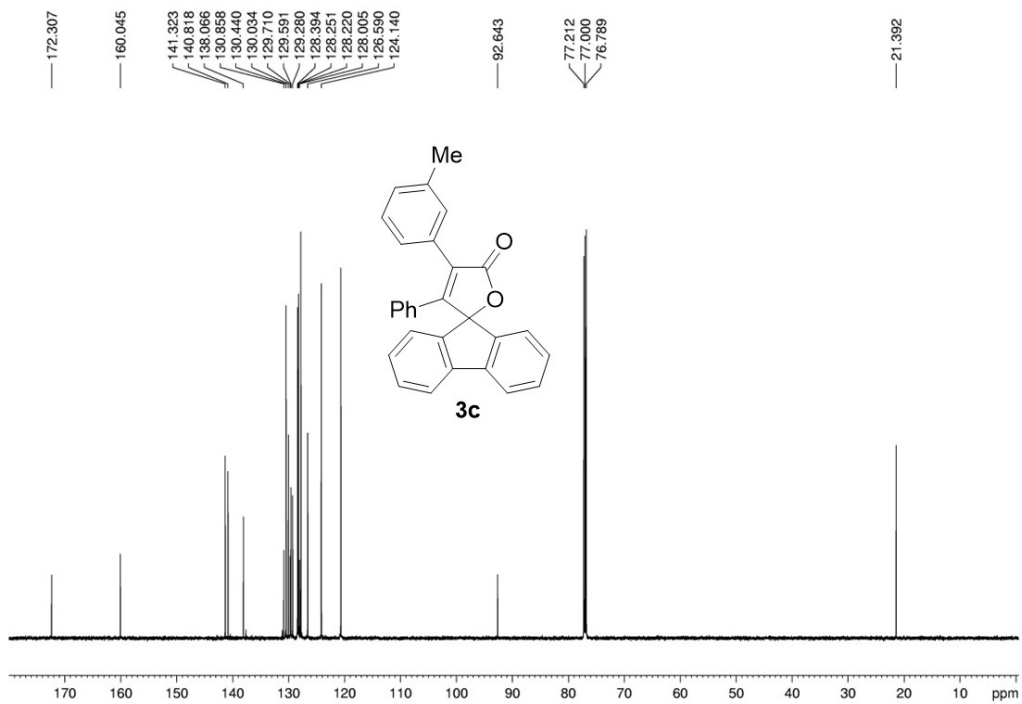

<sup>1</sup>H NMR (600 MHz, CDCl<sub>3</sub>) and <sup>13</sup>C{<sup>1</sup>H} NMR (150 MHz, CDCl<sub>3</sub>) of **3d**

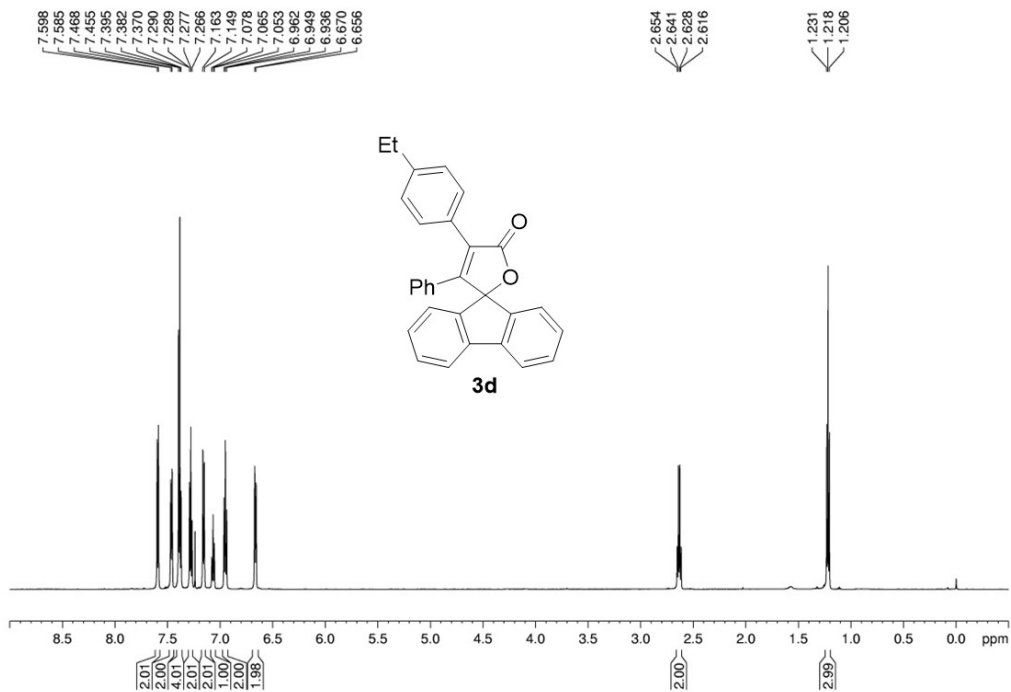

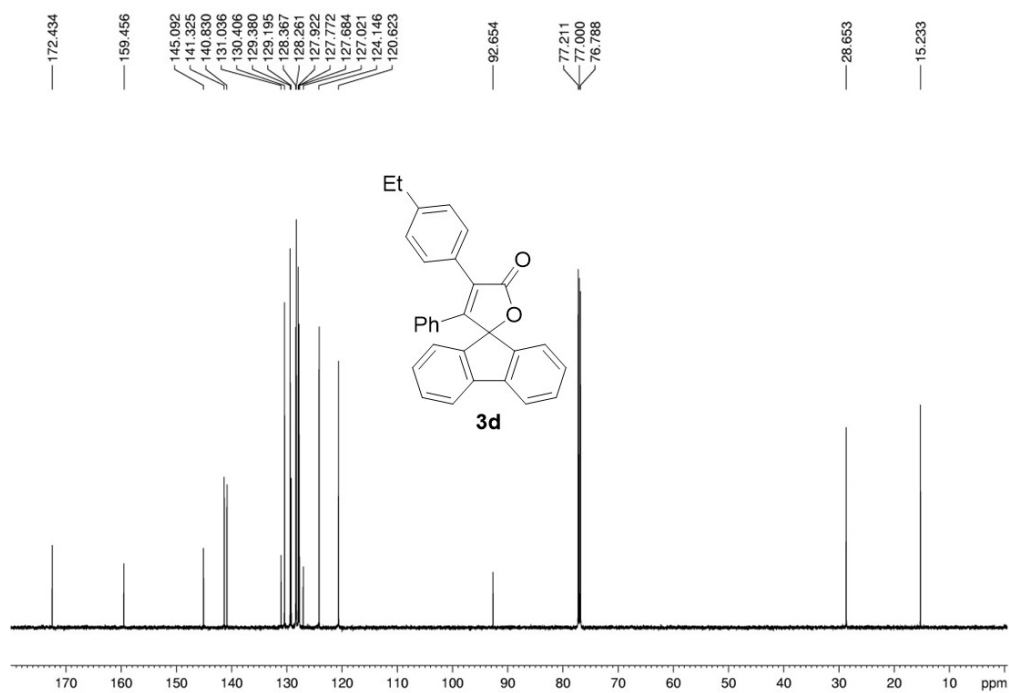

**<sup>1</sup>H NMR (600 MHz, CDCl<sub>3</sub>) and <sup>13</sup>C{<sup>1</sup>H} NMR (150 MHz, CDCl<sub>3</sub>) of 3e**

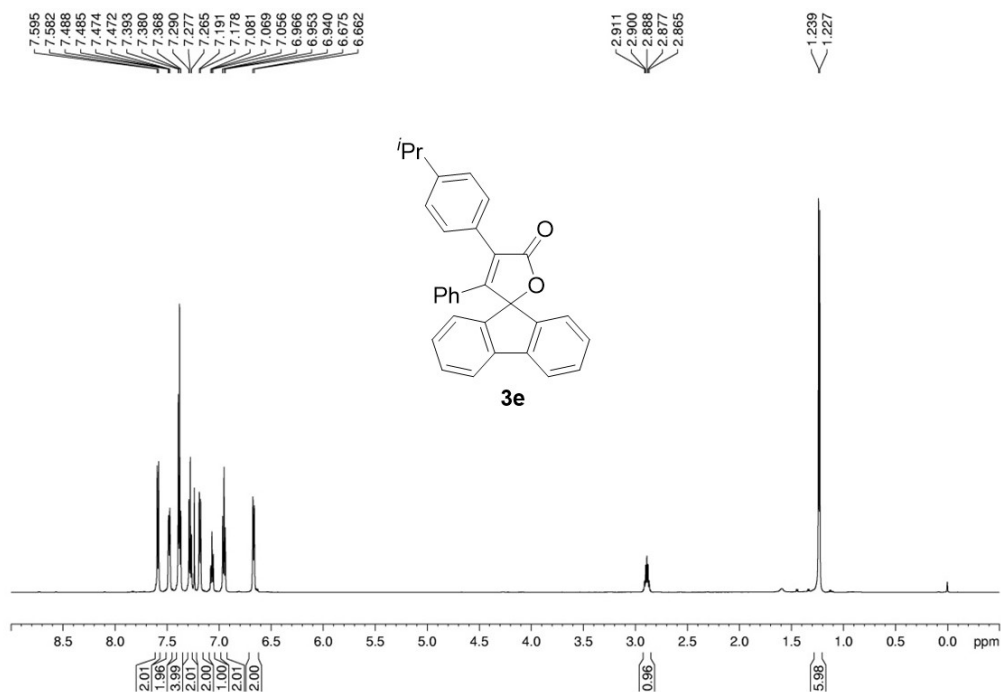

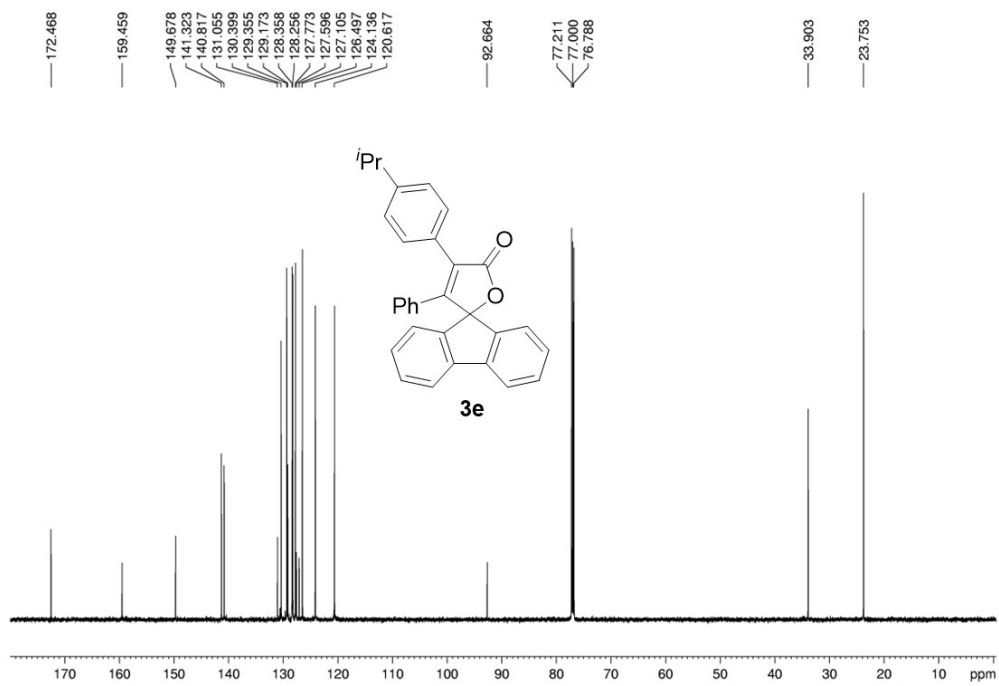

<sup>1</sup>H NMR (600 MHz, CDCl<sub>3</sub>) and <sup>13</sup>C{<sup>1</sup>H} NMR (150 MHz, CDCl<sub>3</sub>) of **3f**

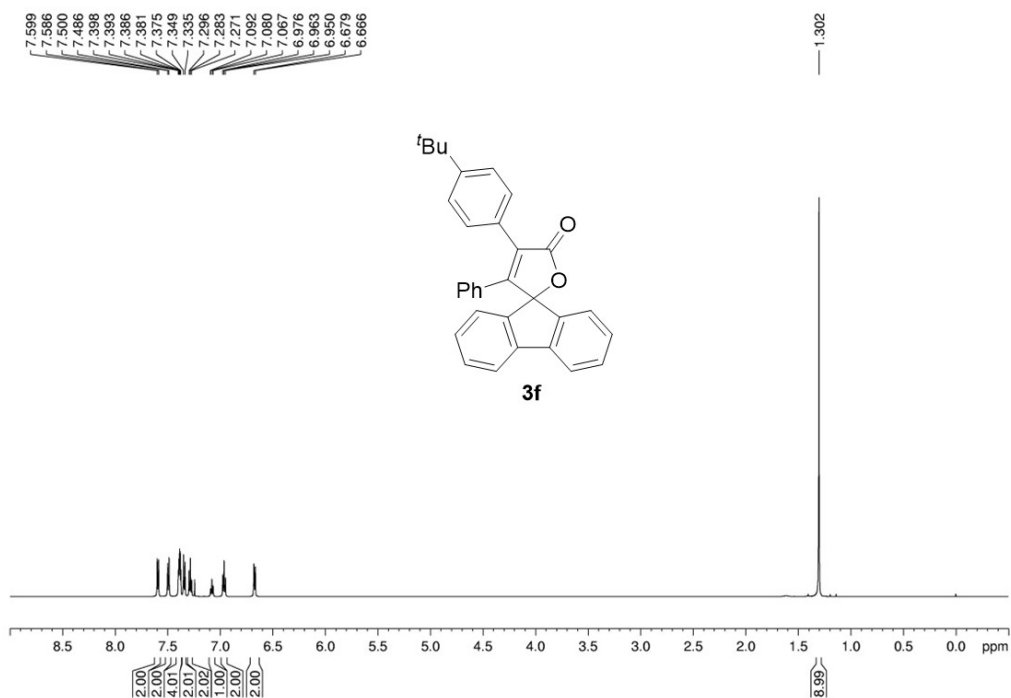

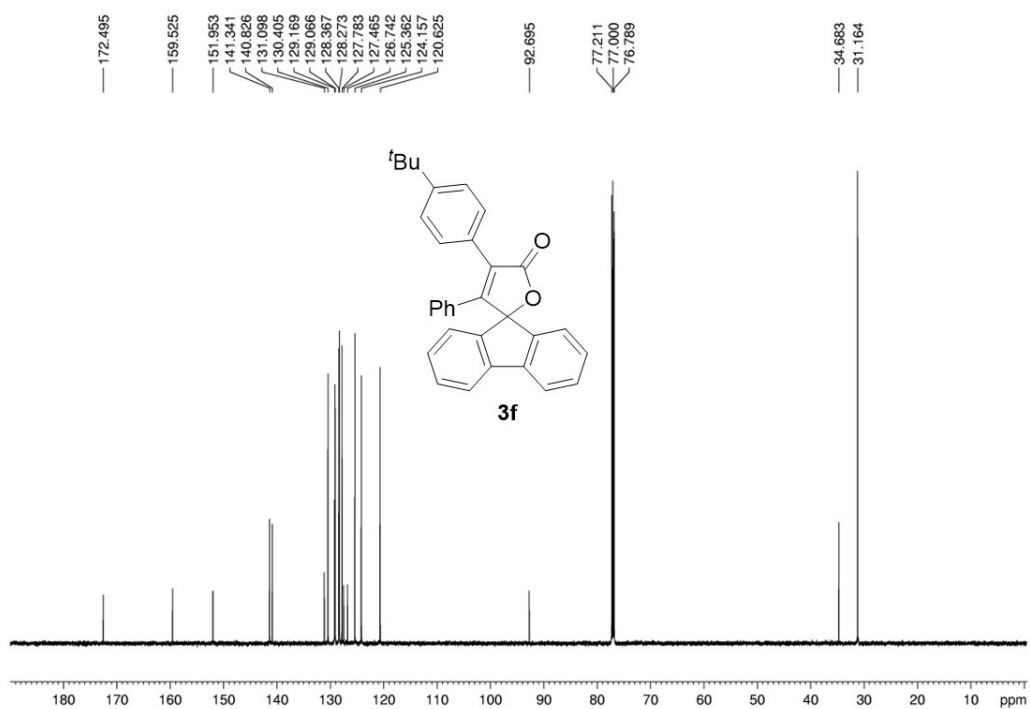

$^1\text{H}$  NMR (600 MHz,  $\text{CDCl}_3$ ),  $^{13}\text{C}\{^1\text{H}\}$  NMR (150 MHz,  $\text{CDCl}_3$ ) and  $^{19}\text{F}\{^1\text{H}\}$  NMR (565 MHz,  $\text{CDCl}_3$ ) of **3g**

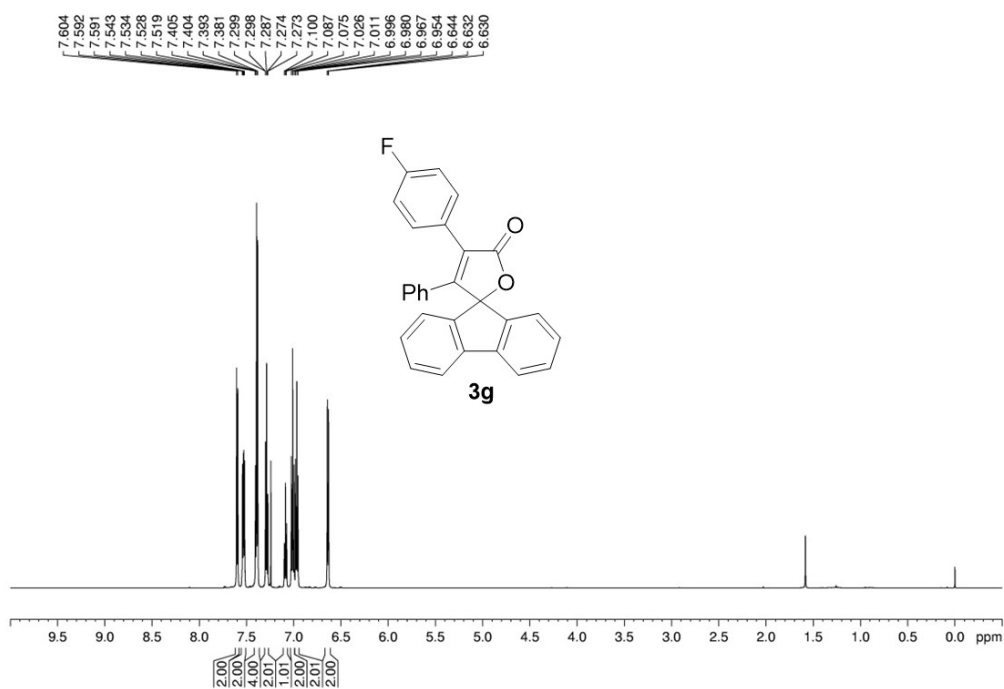

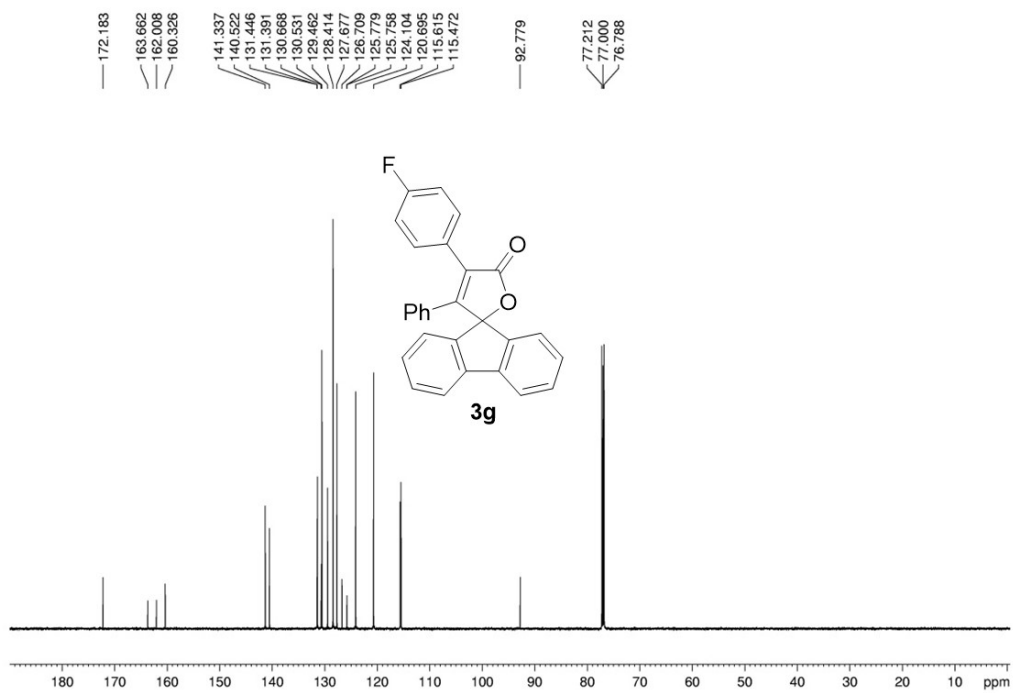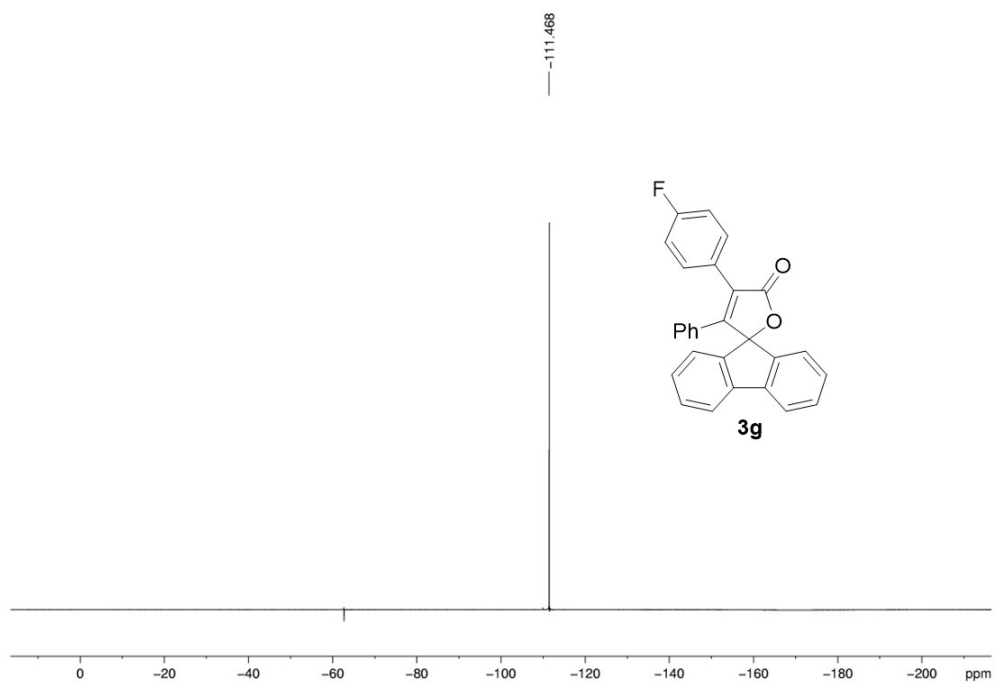

$^1\text{H}$  NMR (600 MHz,  $\text{CDCl}_3$ ),  $^{13}\text{C}\{^1\text{H}\}$  NMR (150 MHz,  $\text{CDCl}_3$ ) and  $^{19}\text{F}\{^1\text{H}\}$  NMR (565 MHz,  $\text{CDCl}_3$ ) of **3h**

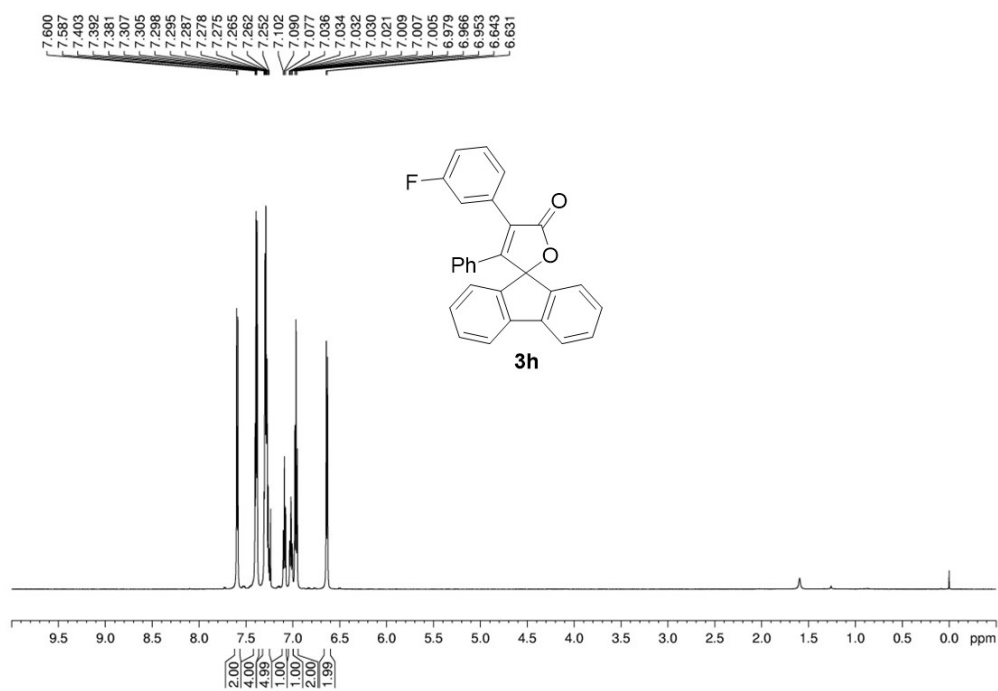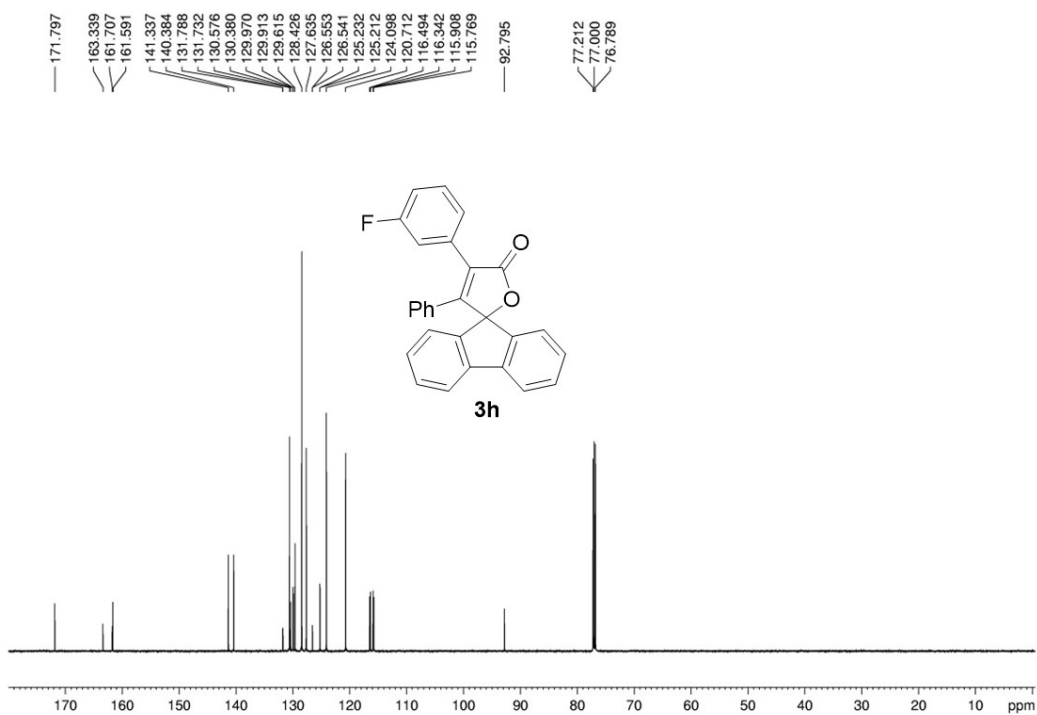



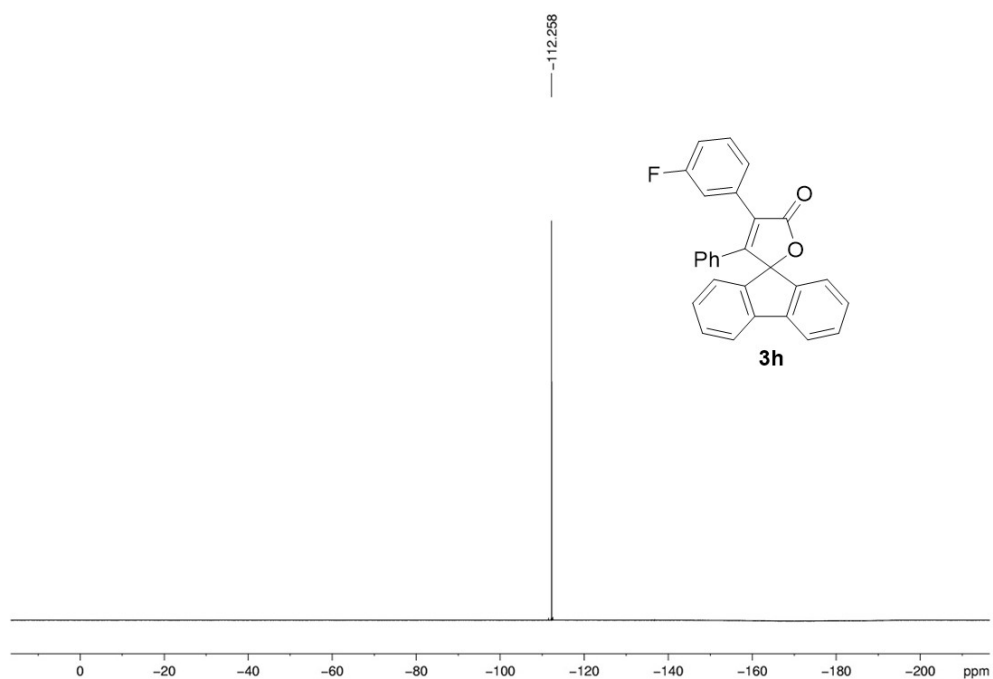

$^1\text{H}$  NMR (600 MHz,  $\text{CDCl}_3$ ),  $^{13}\text{C}\{^1\text{H}\}$  NMR (150 MHz,  $\text{CDCl}_3$ ) and  $^{19}\text{F}\{^1\text{H}\}$  NMR (565 MHz,  $\text{CDCl}_3$ ) of **3i**

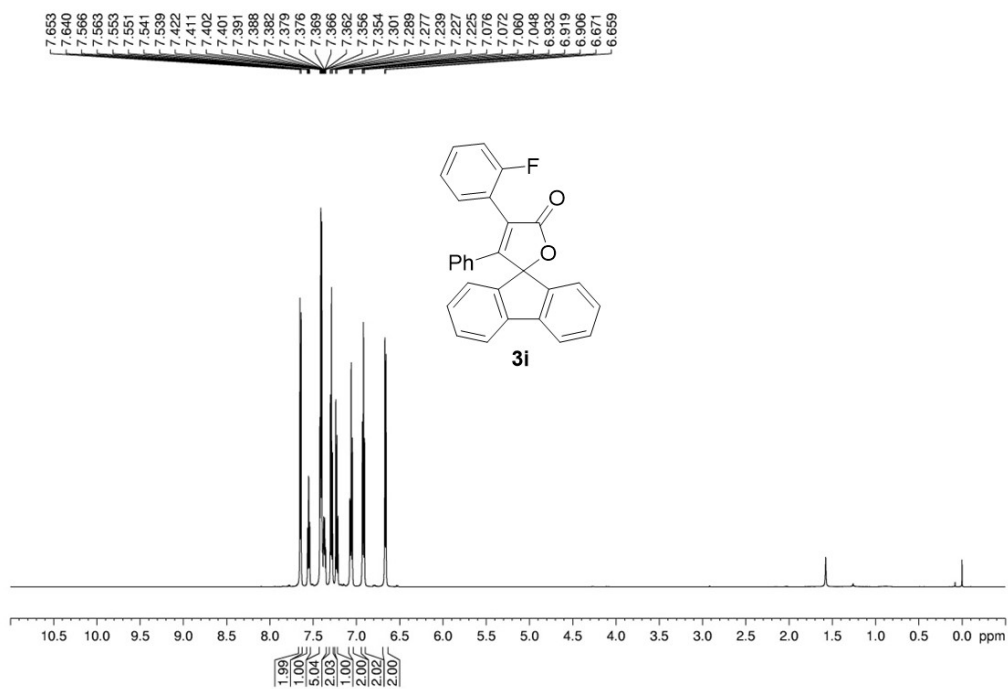

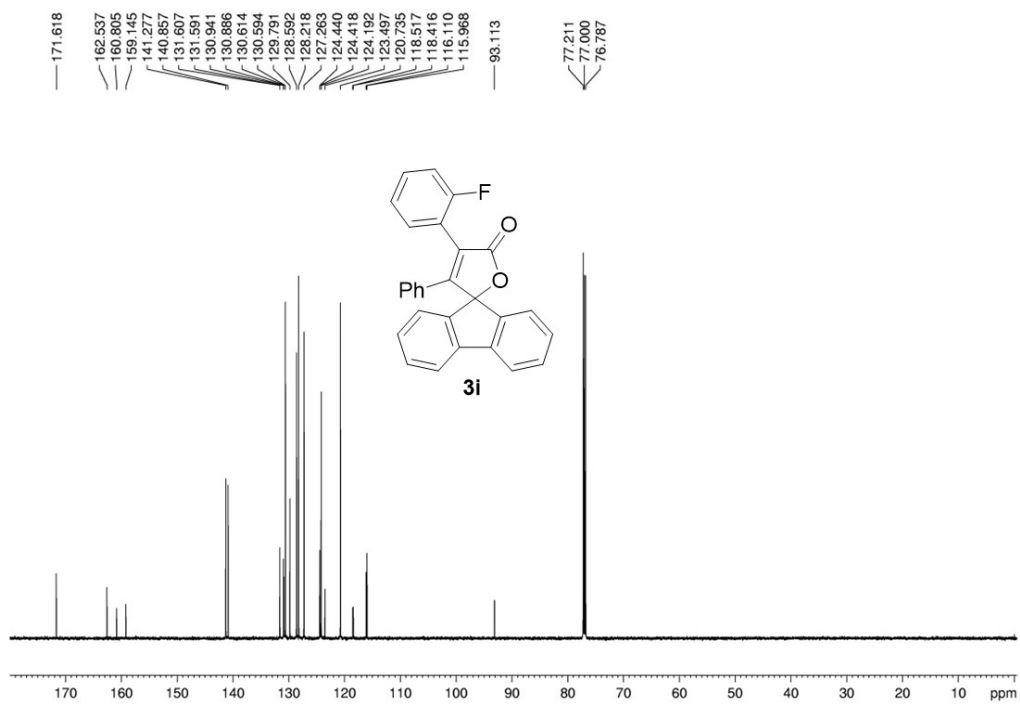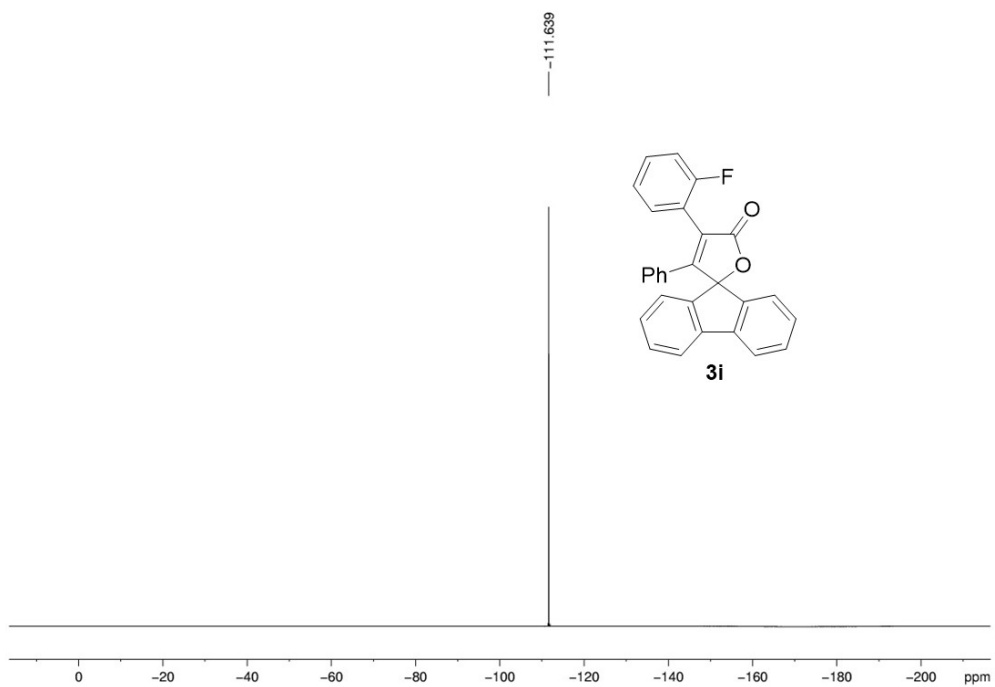

$^1\text{H}$  NMR (600 MHz,  $\text{CDCl}_3$ ) and  $^{13}\text{C}\{^1\text{H}\}$  NMR (150 MHz,  $\text{CDCl}_3$ ) of **3j**

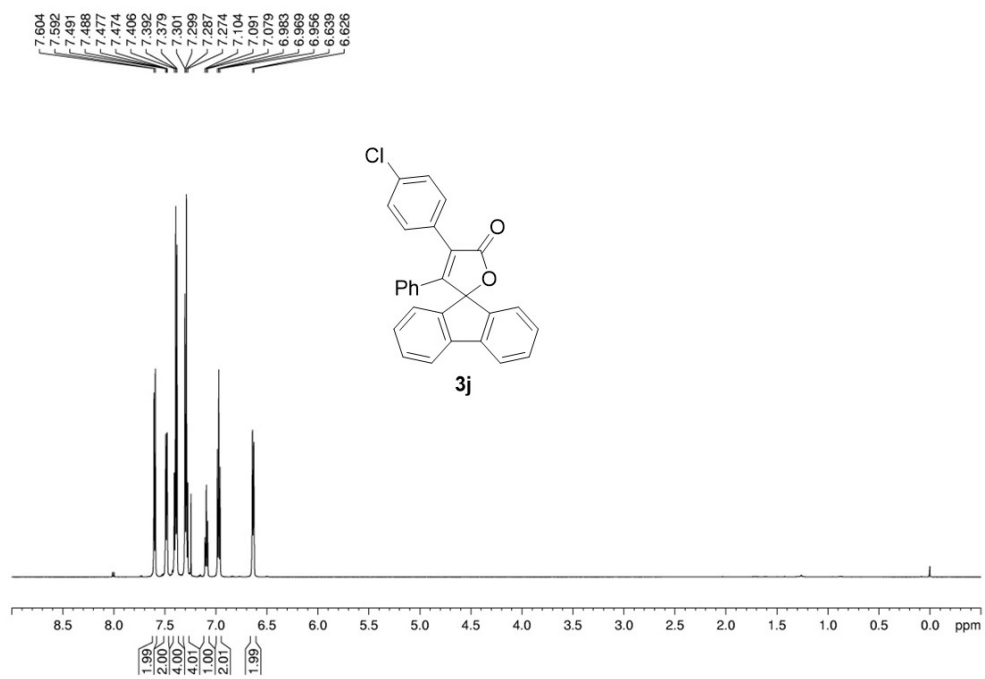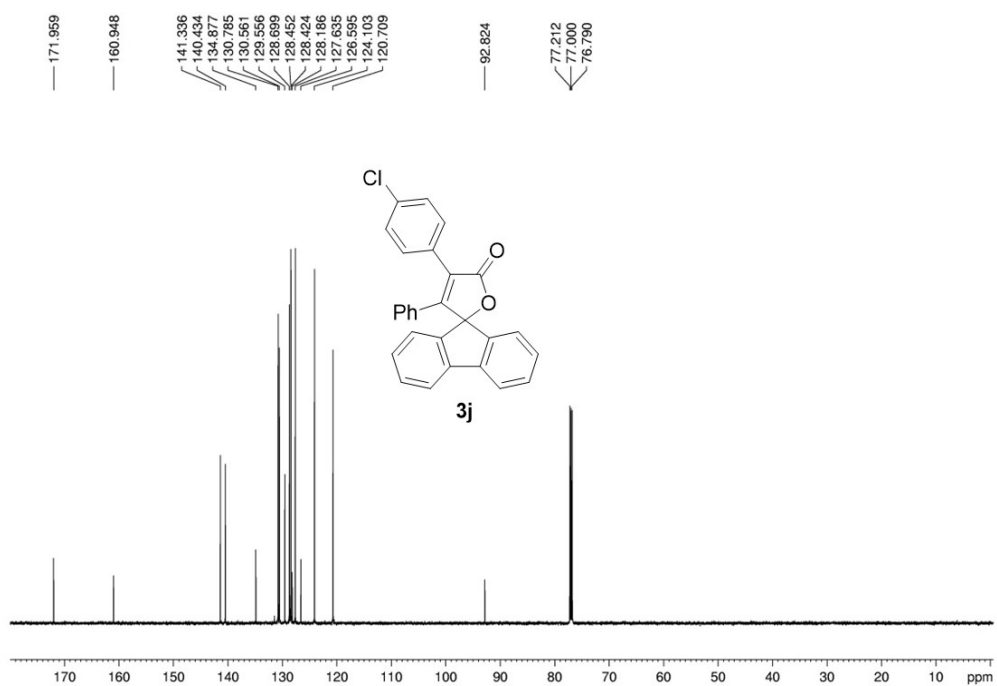

$^1\text{H}$  NMR (600 MHz,  $\text{CDCl}_3$ ) and  $^{13}\text{C}\{^1\text{H}\}$  NMR (150 MHz,  $\text{CDCl}_3$ ) of **3k**

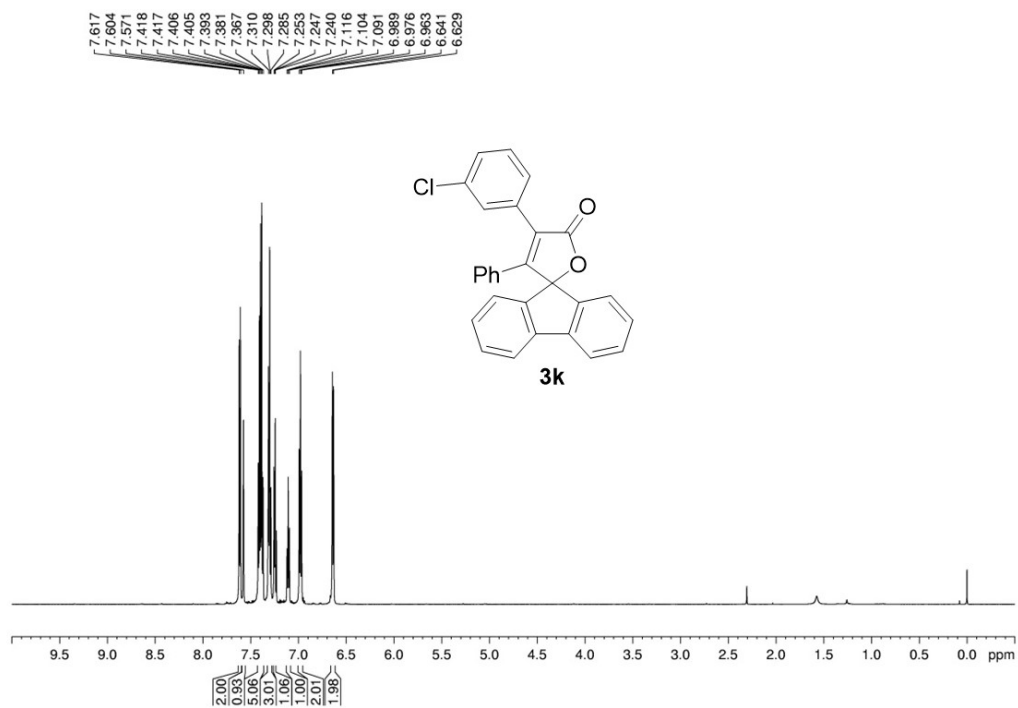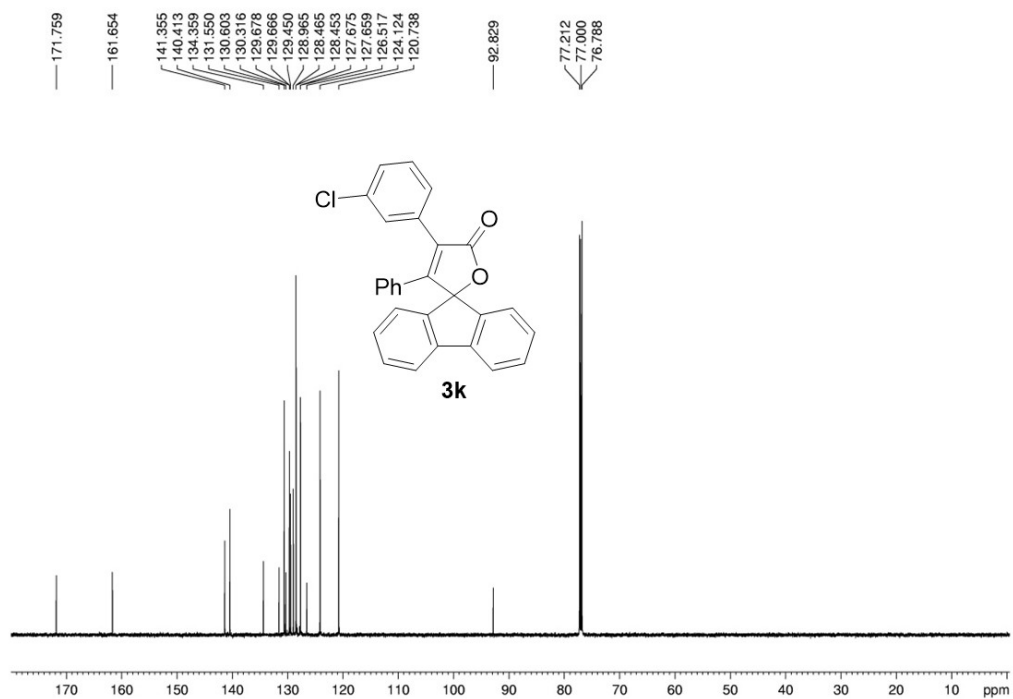

$^1\text{H}$  NMR (600 MHz,  $\text{CDCl}_3$ ) and  $^{13}\text{C}\{^1\text{H}\}$  NMR (150 MHz,  $\text{CDCl}_3$ ) of **31**

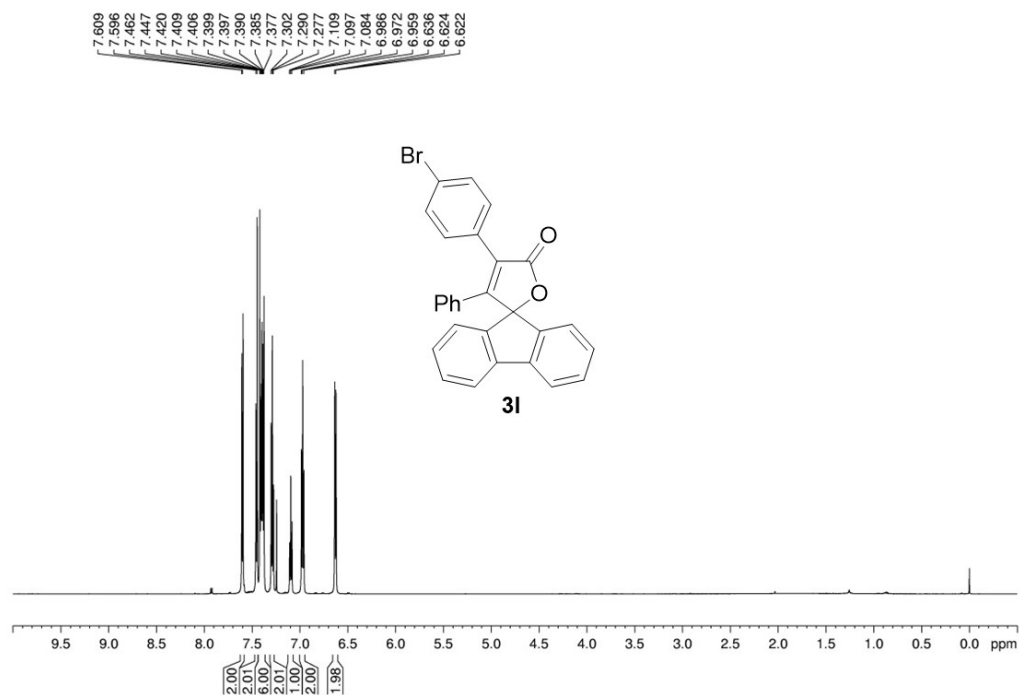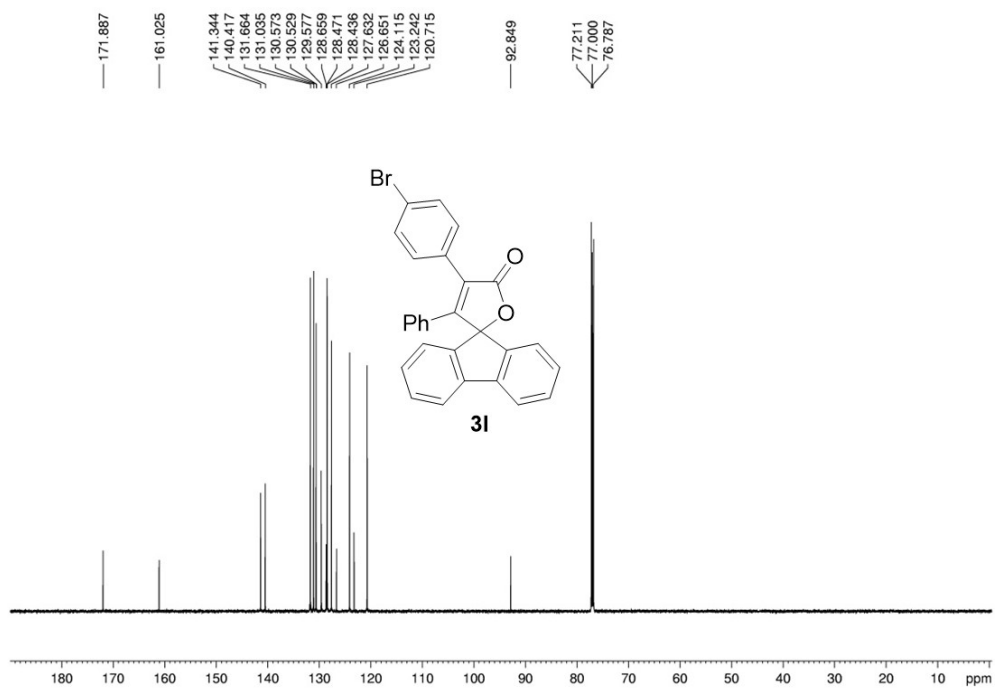

$^1\text{H}$  NMR (600 MHz,  $\text{CDCl}_3$ ) and  $^{13}\text{C}\{^1\text{H}\}$  NMR (150 MHz,  $\text{CDCl}_3$ ) of **3m**

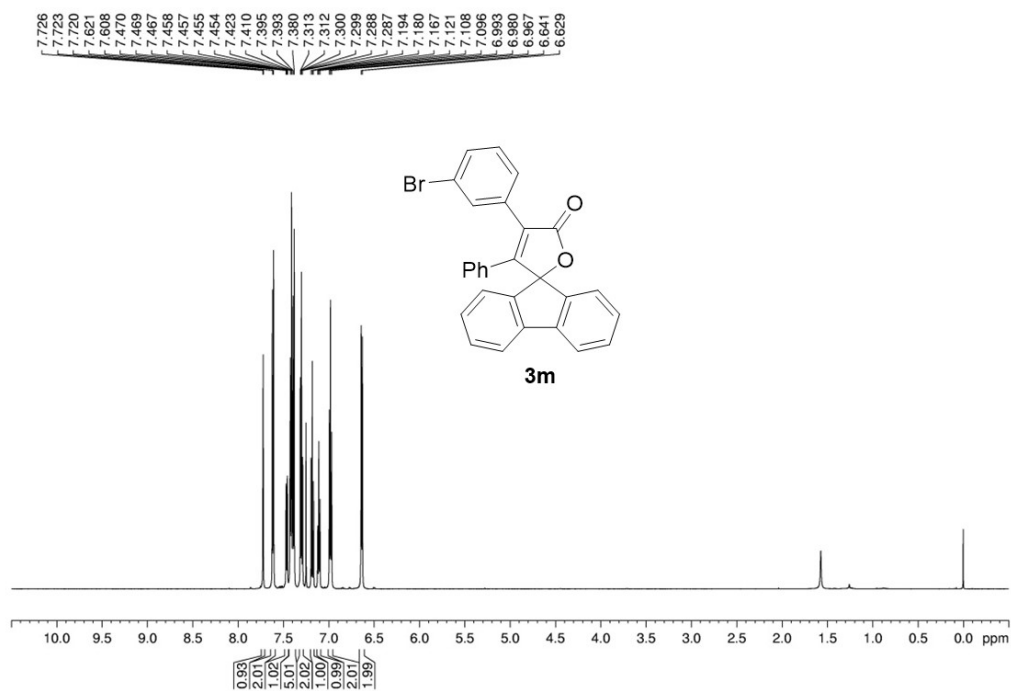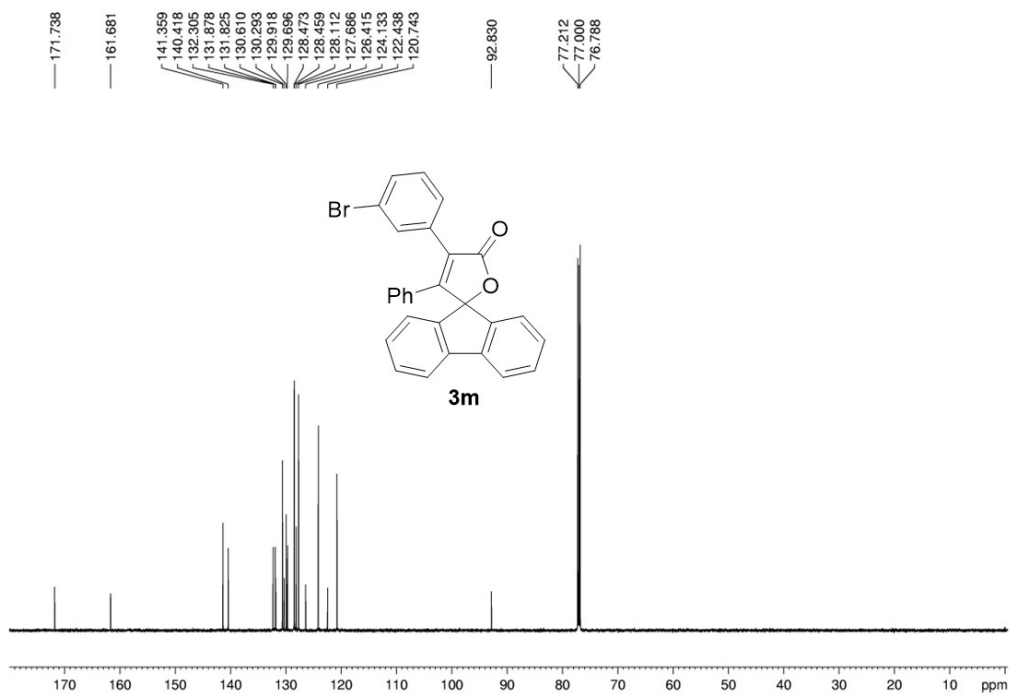

$^1\text{H}$  NMR (600 MHz,  $\text{CDCl}_3$ ) and  $^{13}\text{C}\{^1\text{H}\}$  NMR (150 MHz,  $\text{CDCl}_3$ ) of **3n**

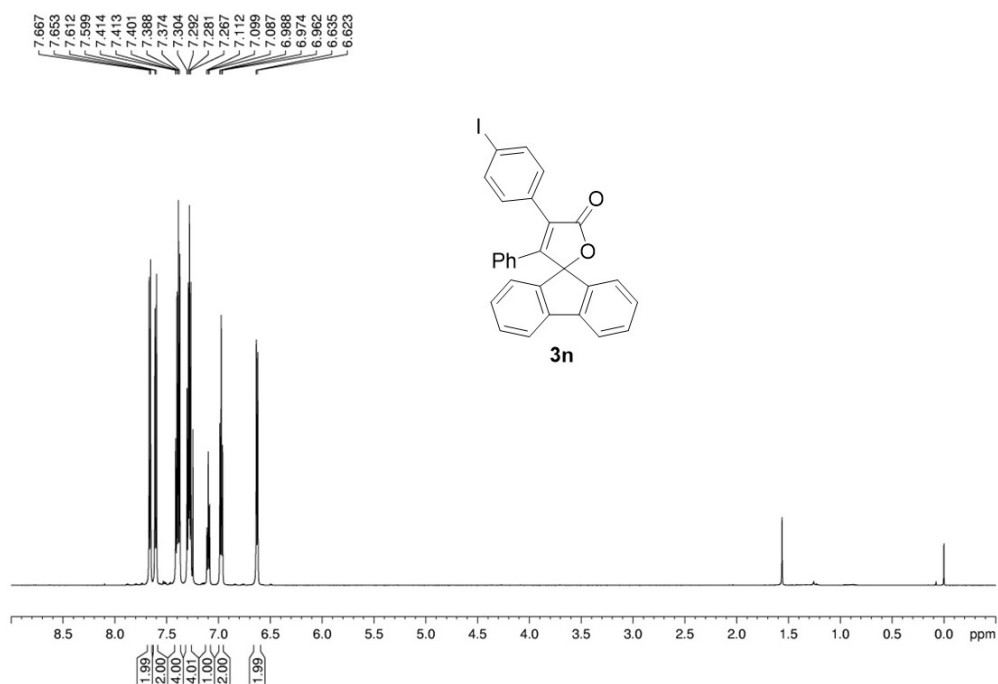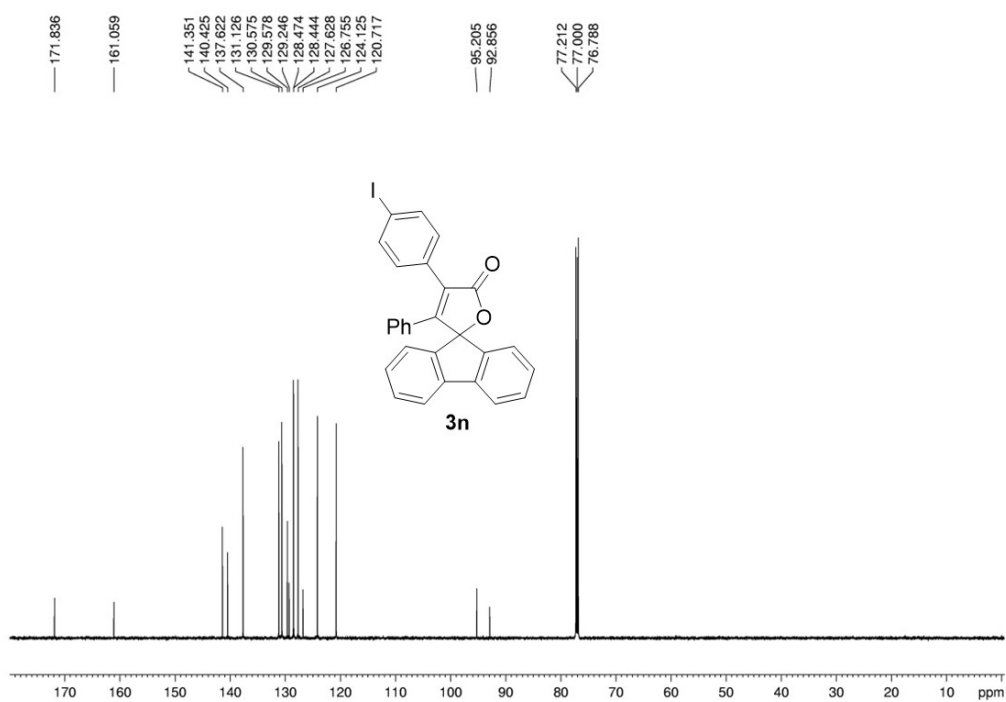

$^1\text{H}$  NMR (600 MHz,  $\text{CDCl}_3$ ),  $^{13}\text{C}\{^1\text{H}\}$  NMR (150 MHz,  $\text{CDCl}_3$ ) and  $^{19}\text{F}\{^1\text{H}\}$  NMR (565 MHz,  $\text{CDCl}_3$ ) of **3o**

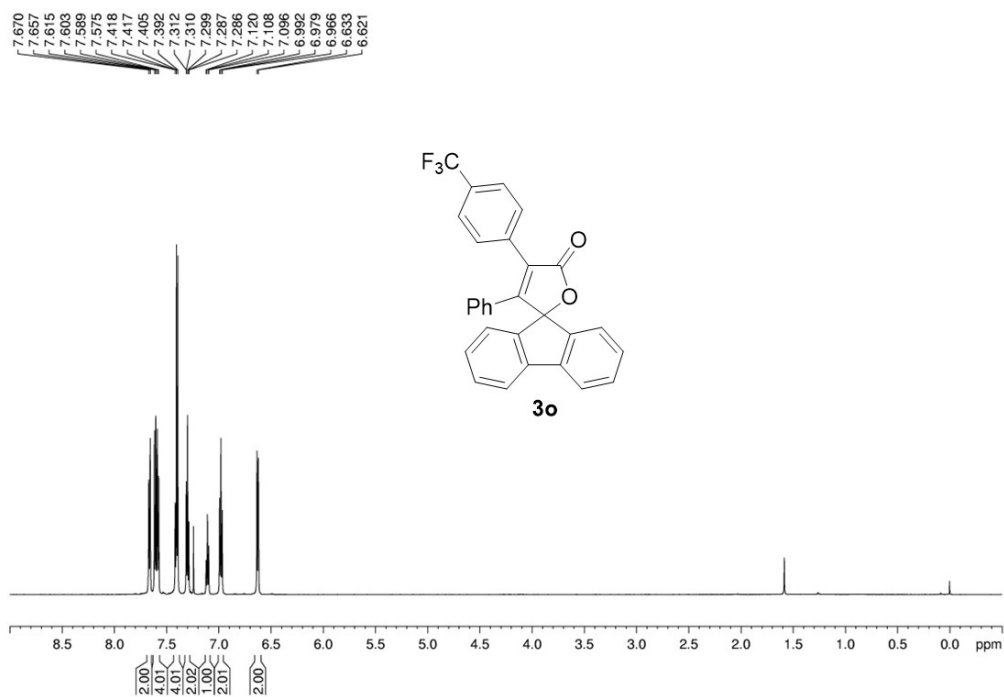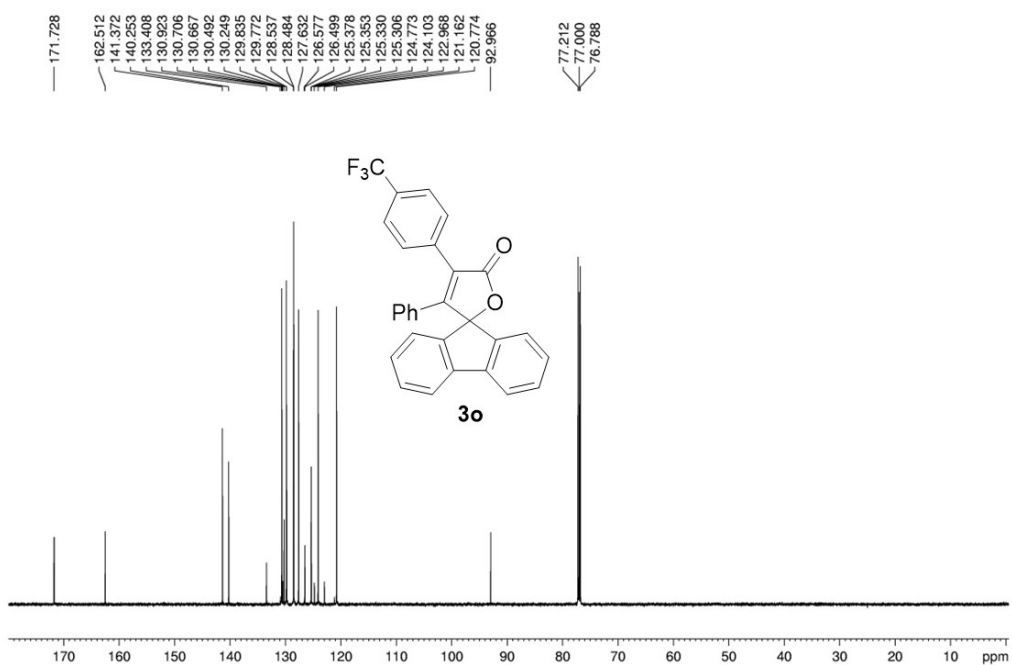



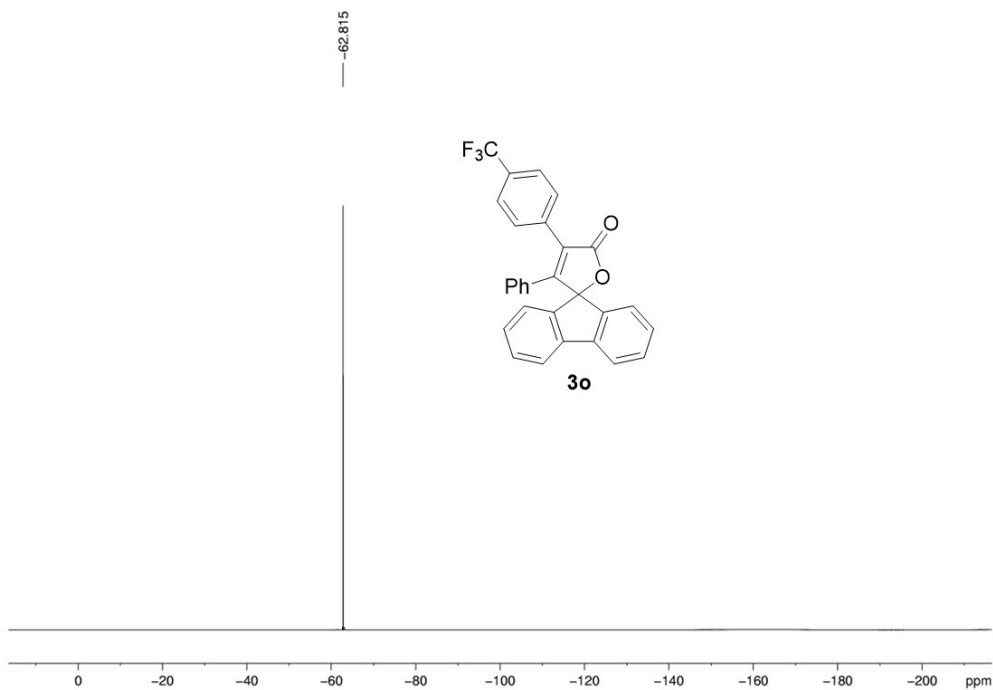

$^1\text{H}$  NMR (600 MHz,  $\text{CDCl}_3$ ) and  $^{13}\text{C}\{^1\text{H}\}$  NMR (150 MHz,  $\text{CDCl}_3$ ) of **3p**

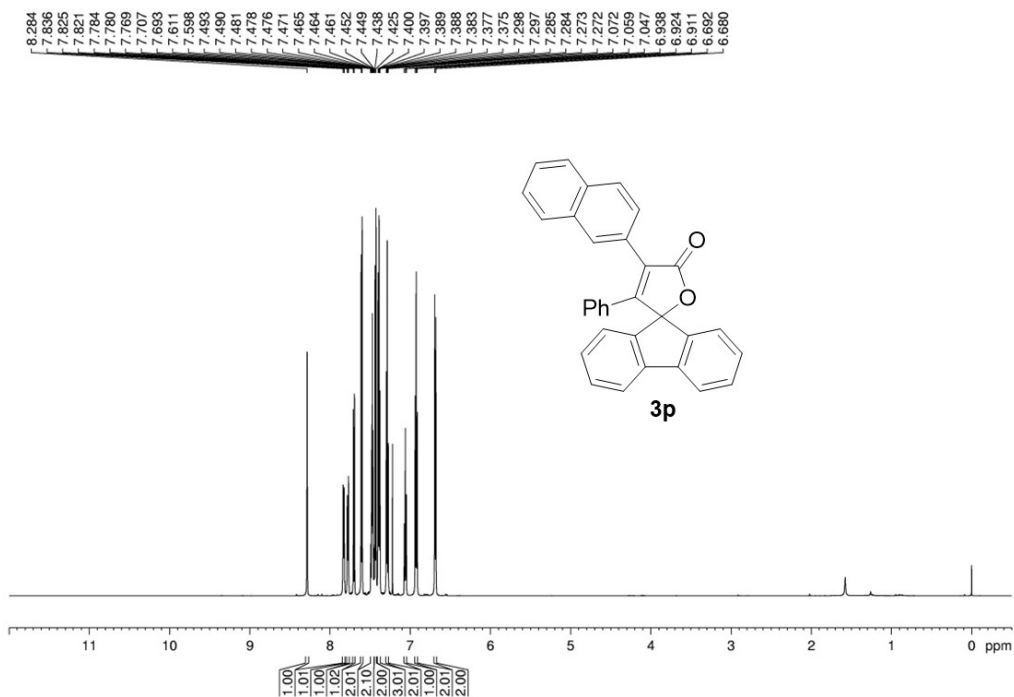

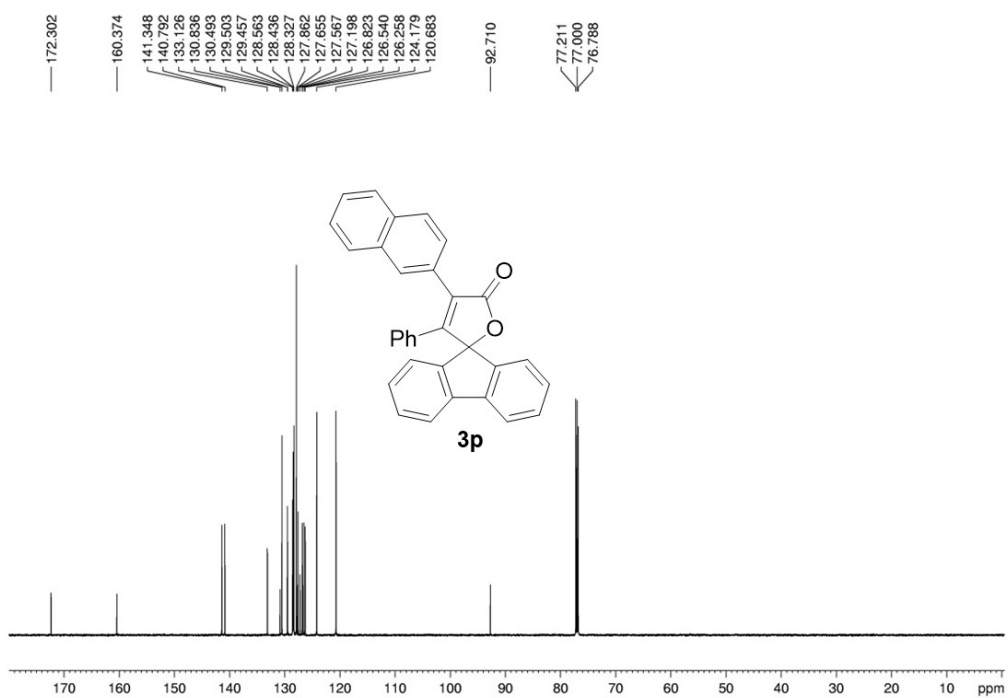

<sup>1</sup>H NMR (600 MHz, CDCl<sub>3</sub>) and <sup>13</sup>C{<sup>1</sup>H} NMR (150 MHz, CDCl<sub>3</sub>) of **3q**

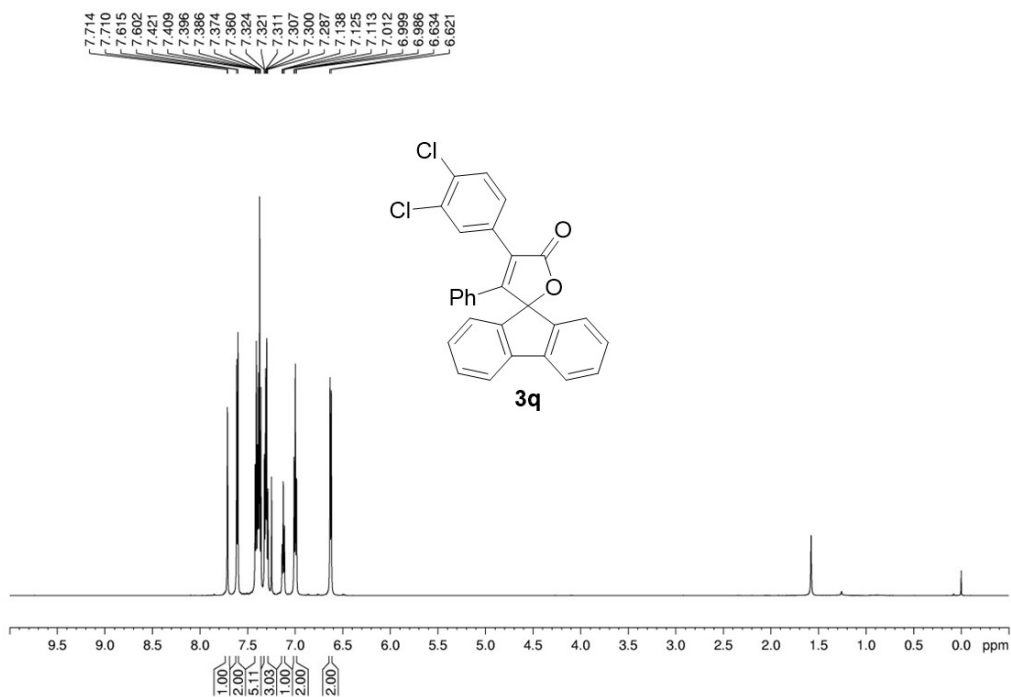

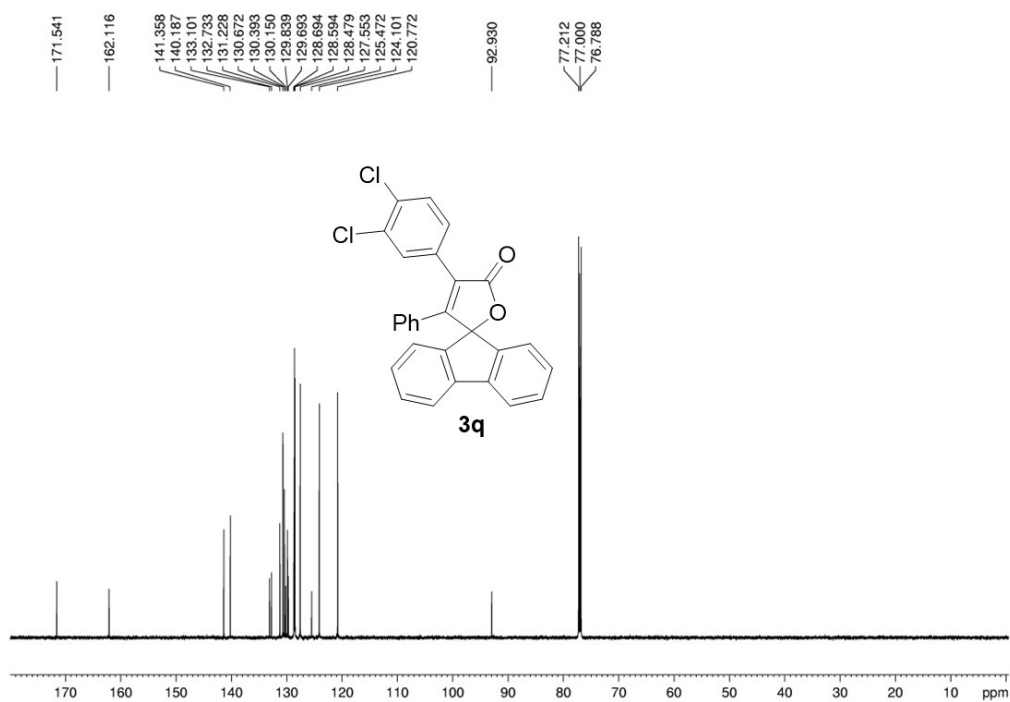

**<sup>1</sup>H NMR (600 MHz, CDCl<sub>3</sub>) and <sup>13</sup>C{<sup>1</sup>H} NMR (150 MHz, CDCl<sub>3</sub>) of **3r****

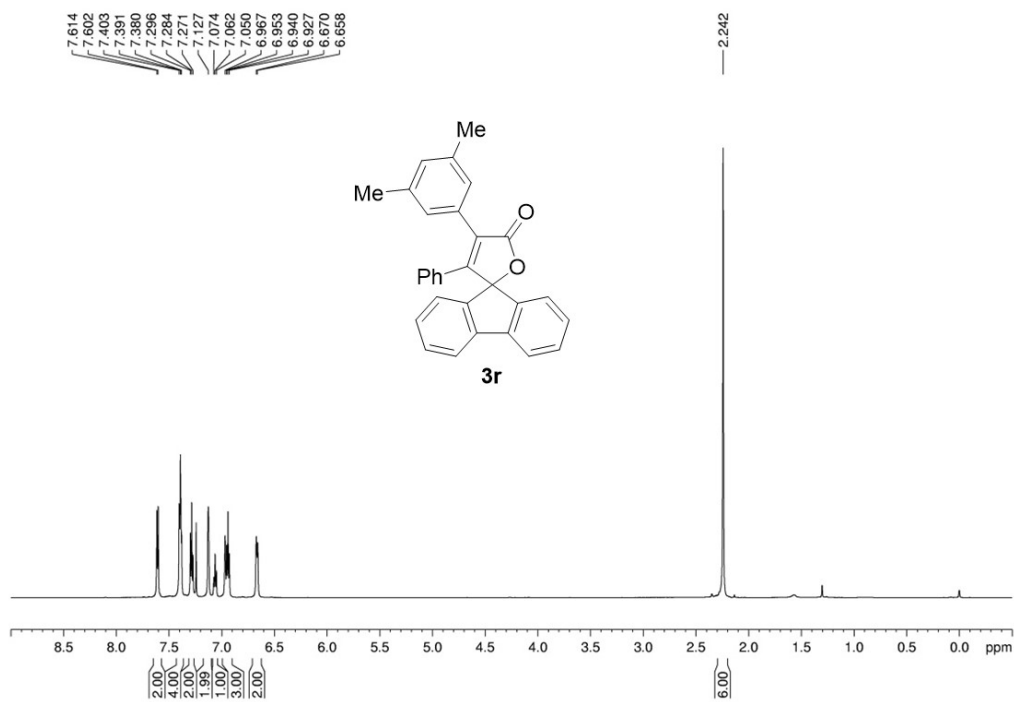

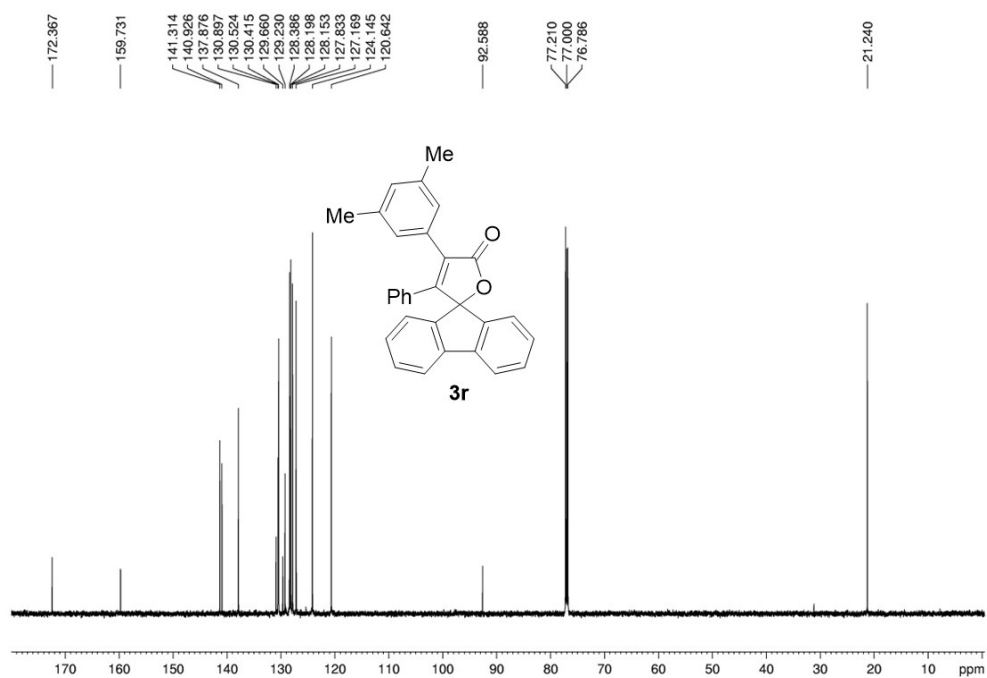

<sup>1</sup>H NMR (600 MHz, CDCl<sub>3</sub>) and <sup>13</sup>C{<sup>1</sup>H} NMR (150 MHz, CDCl<sub>3</sub>) of **3s**

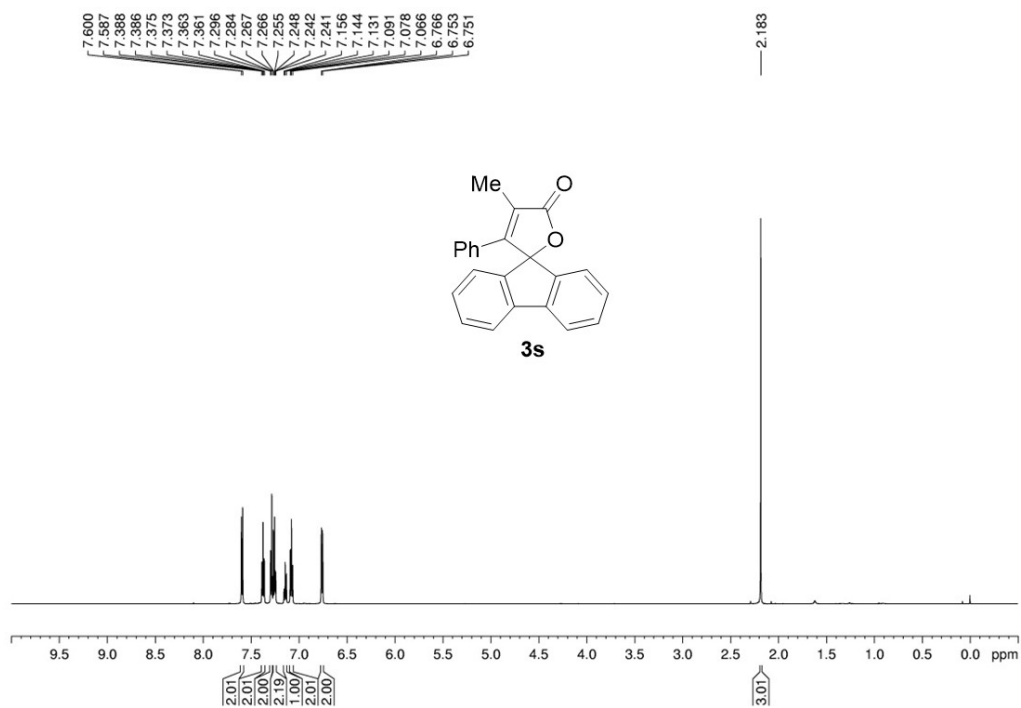

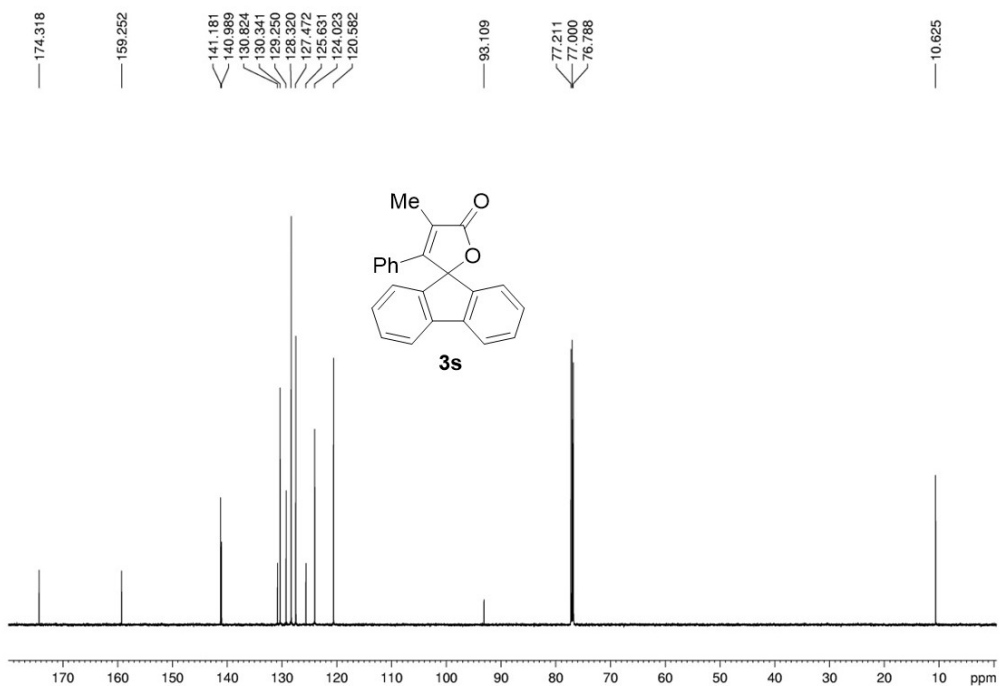

<sup>1</sup>H NMR (600 MHz, CDCl<sub>3</sub>) and <sup>13</sup>C{<sup>1</sup>H} NMR (150 MHz, CDCl<sub>3</sub>) of **3t**

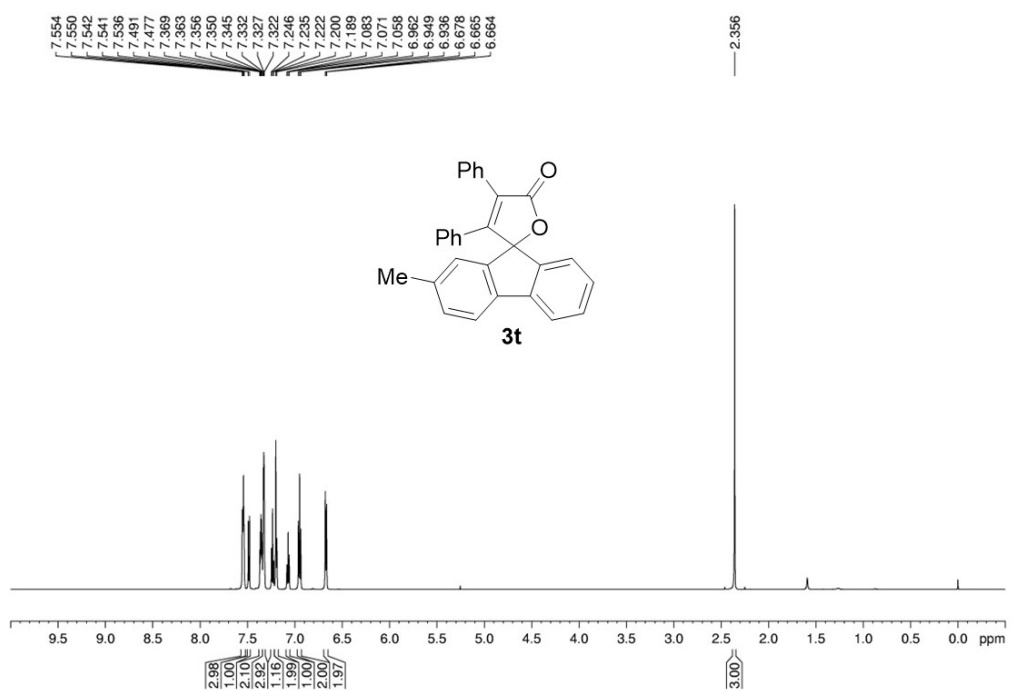

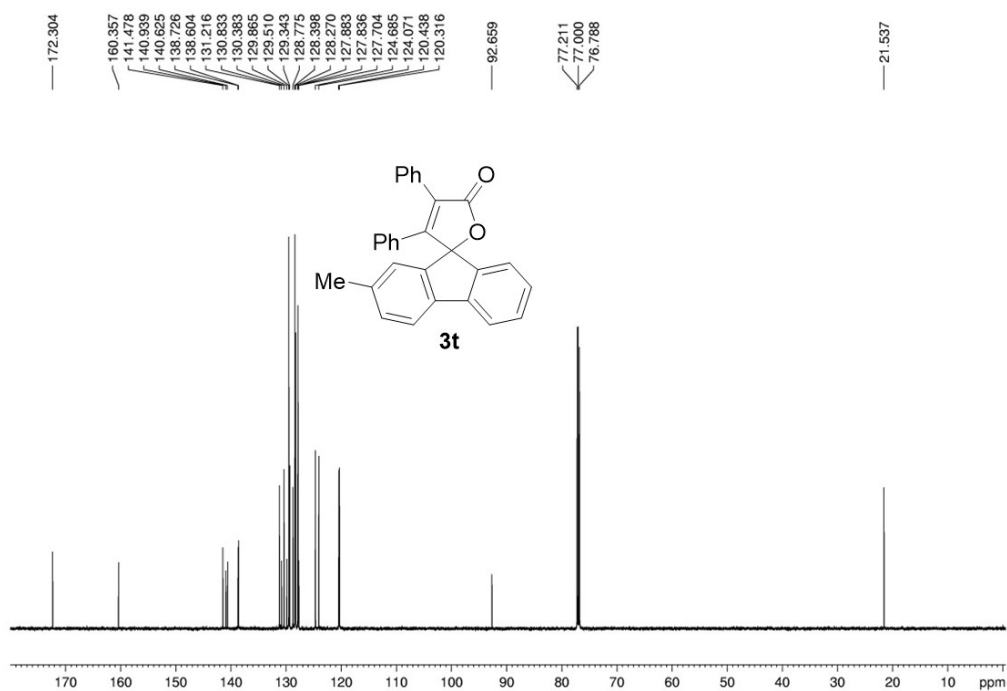

**<sup>1</sup>H NMR (600 MHz, CDCl<sub>3</sub>) and <sup>13</sup>C{<sup>1</sup>H} NMR (150 MHz, CDCl<sub>3</sub>) of 3u**

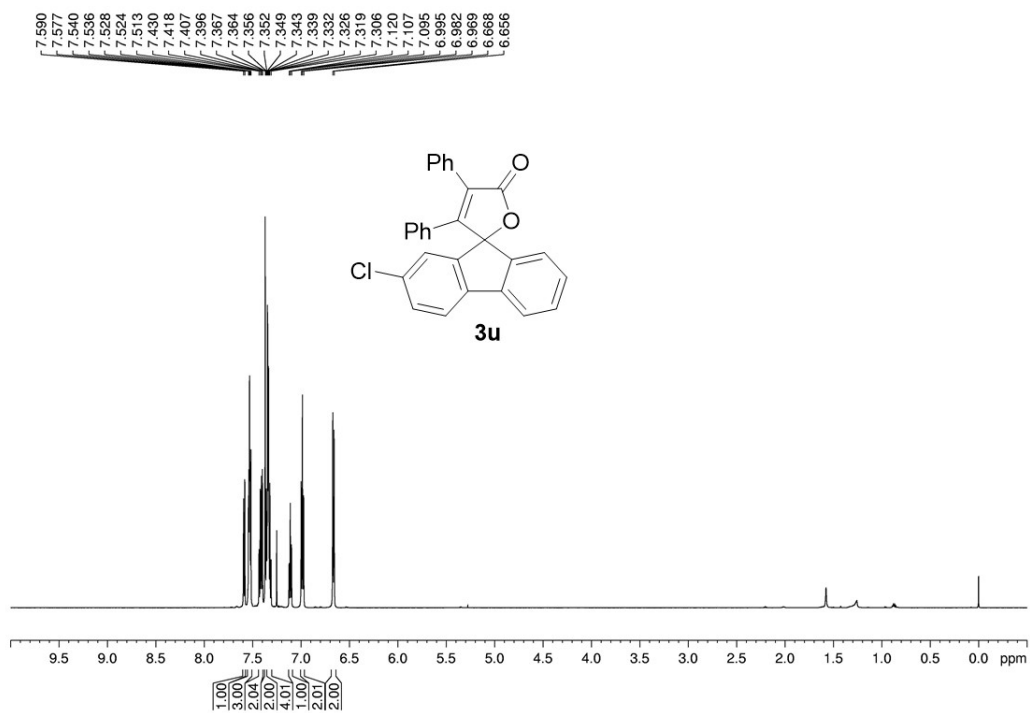

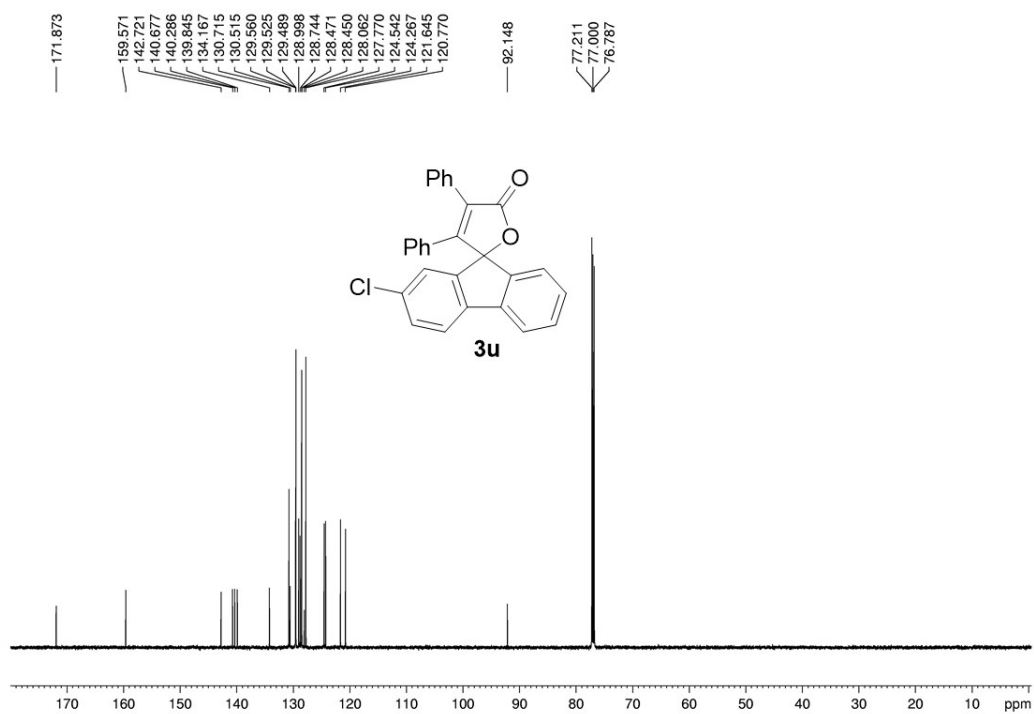

$^1\text{H}$  NMR (600 MHz,  $\text{CDCl}_3$ ),  $^{13}\text{C}\{^1\text{H}\}$  NMR (150 MHz,  $\text{CDCl}_3$ ) and  $^{19}\text{F}\{^1\text{H}\}$  NMR (565 MHz,  $\text{CDCl}_3$ ) of **3v**

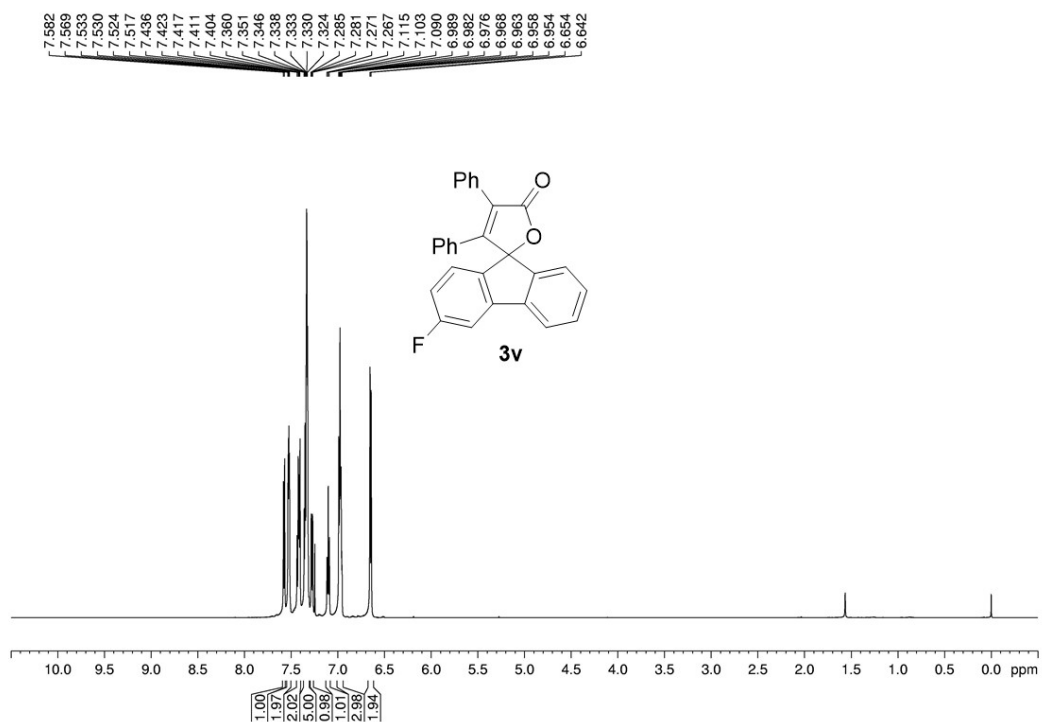

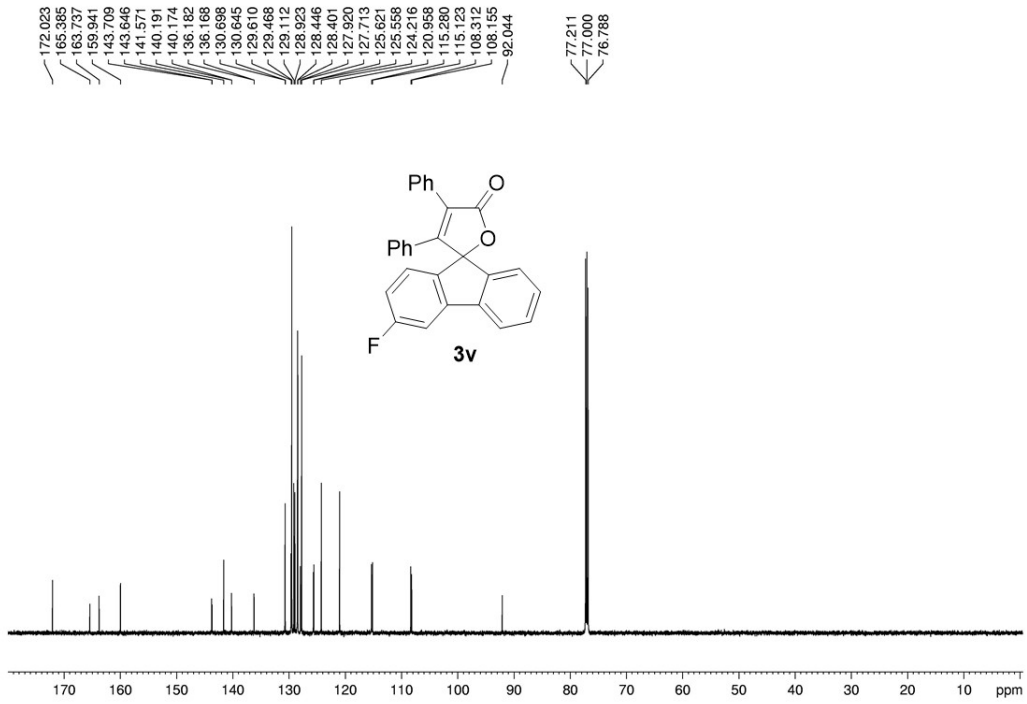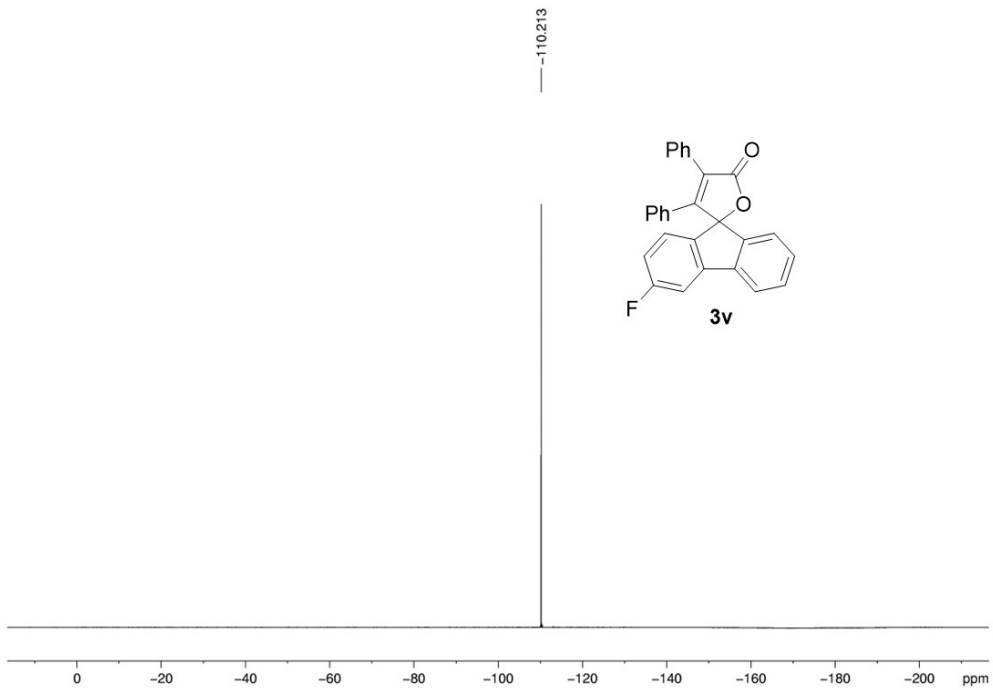



$^1\text{H}$  NMR (600 MHz,  $\text{CDCl}_3$ ) and  $^{13}\text{C}\{^1\text{H}\}$  NMR (150 MHz,  $\text{CDCl}_3$ ) of **3w**

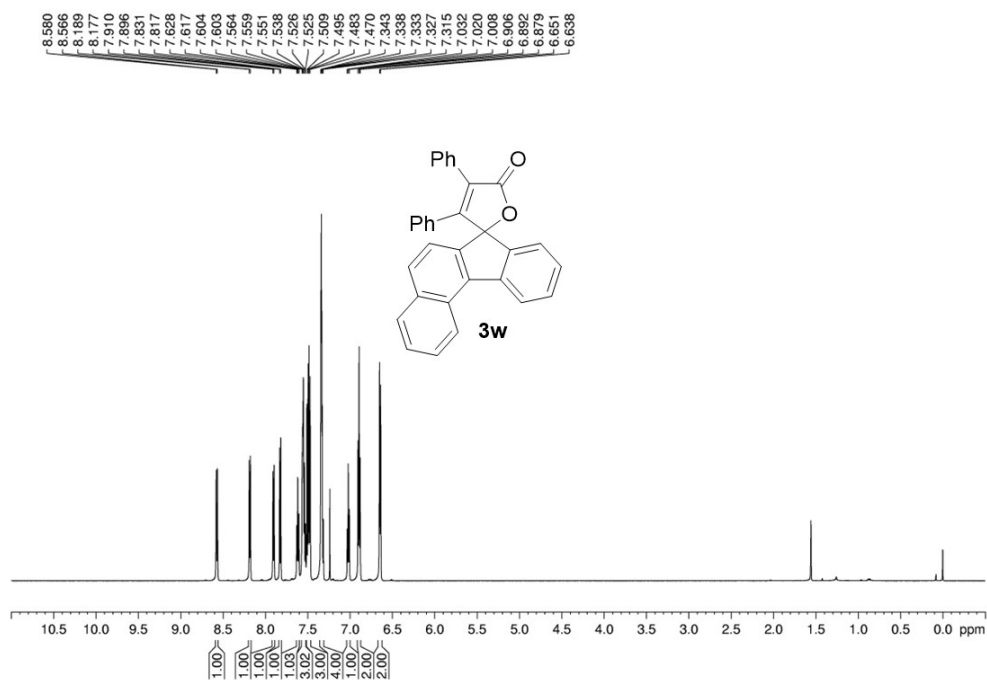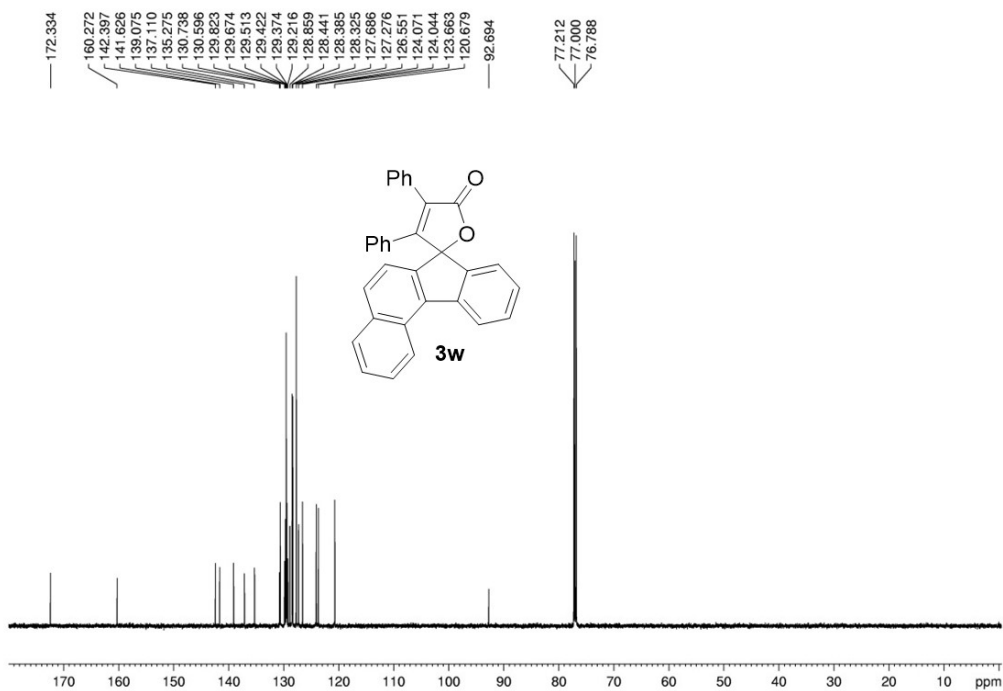

$^1\text{H}$  NMR (600 MHz,  $\text{CDCl}_3$ ) and  $^{13}\text{C}\{^1\text{H}\}$  NMR (150 MHz,  $\text{CDCl}_3$ ) of **3x**

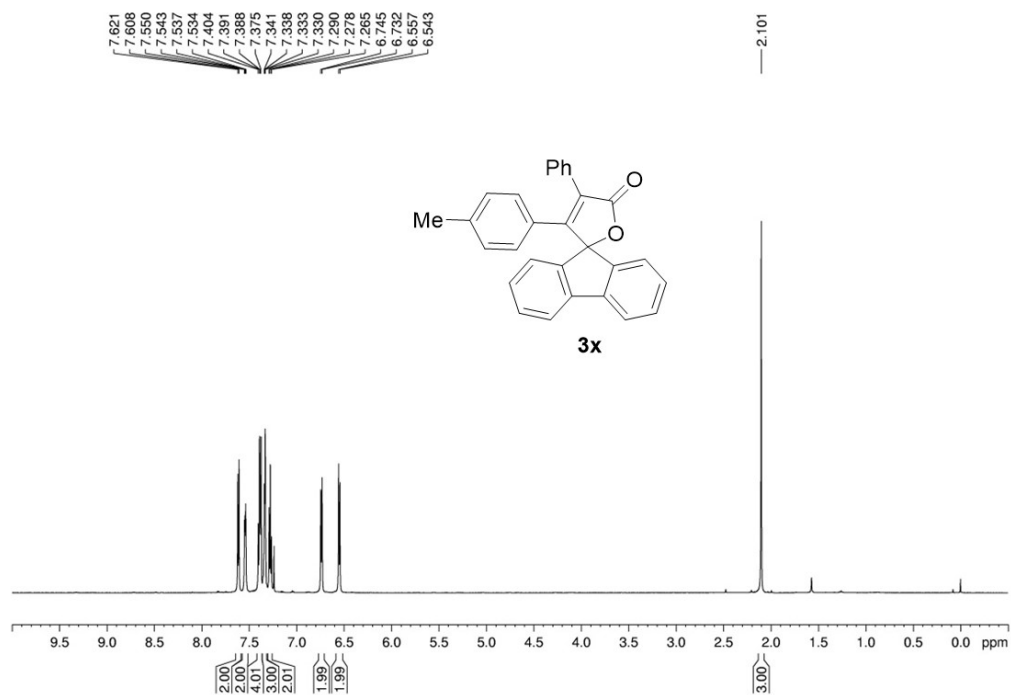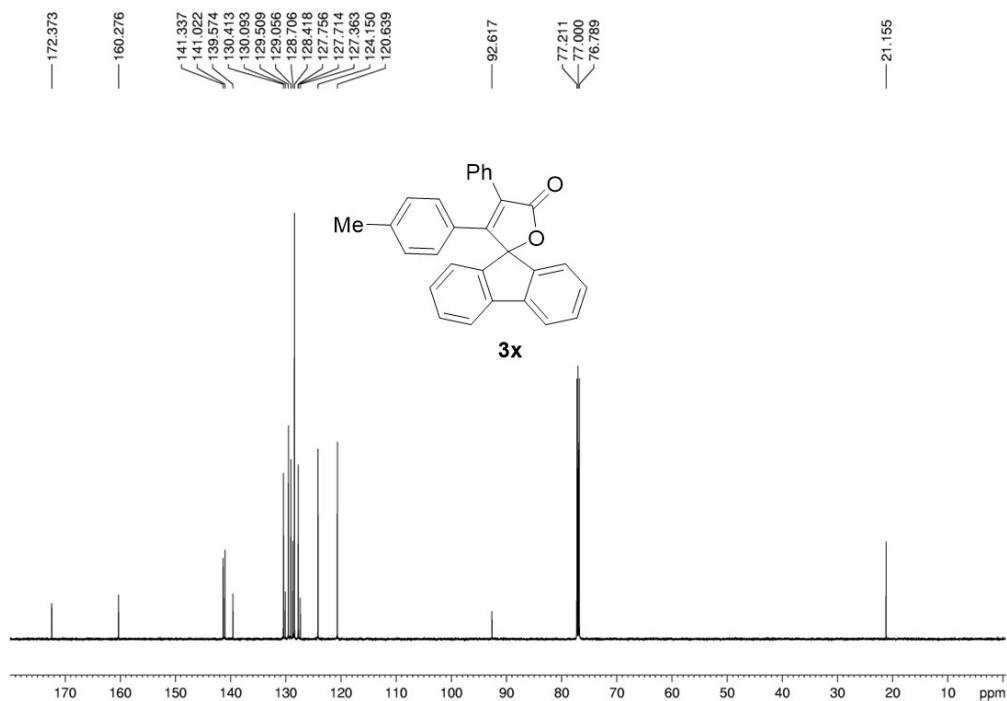

$^1\text{H}$  NMR (600 MHz,  $\text{CDCl}_3$ ),  $^{13}\text{C}\{^1\text{H}\}$  NMR (150 MHz,  $\text{CDCl}_3$ ) and  $^{19}\text{F}\{^1\text{H}\}$  NMR (565 MHz,  $\text{CDCl}_3$ ) of **3y**

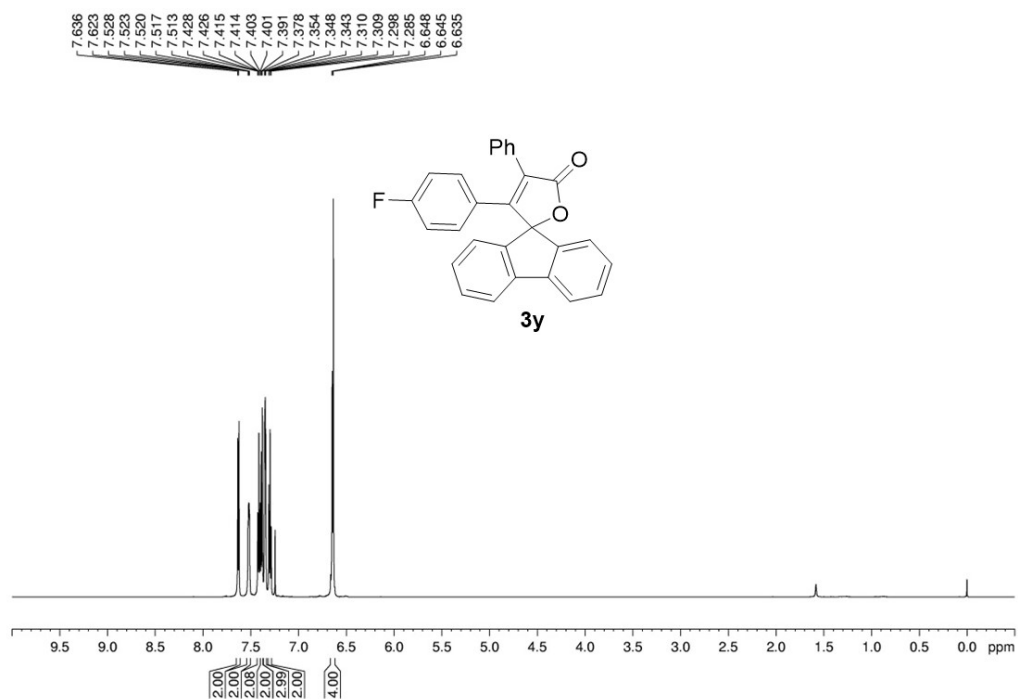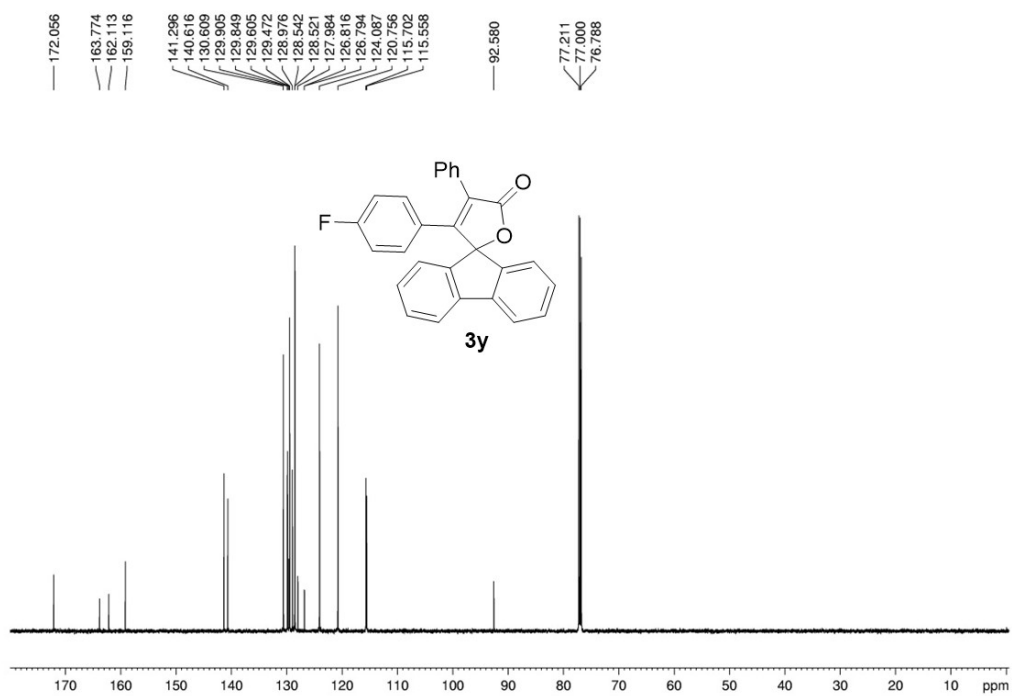

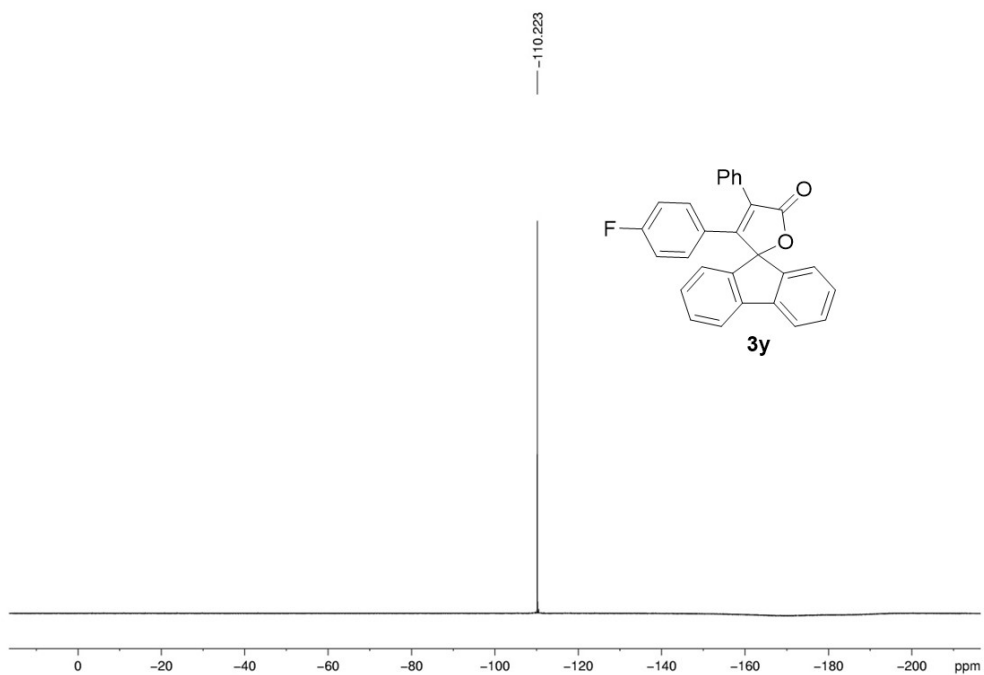

$^1\text{H}$  NMR (600 MHz,  $\text{CDCl}_3$ ) and  $^{13}\text{C}\{^1\text{H}\}$  NMR (150 MHz,  $\text{CDCl}_3$ ) of **3z**

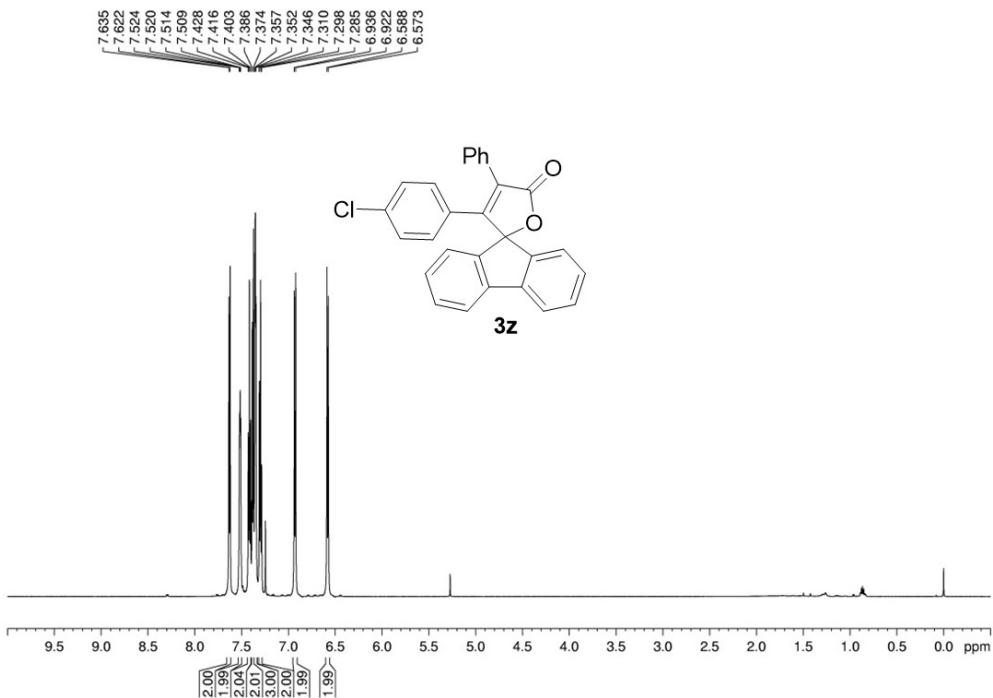

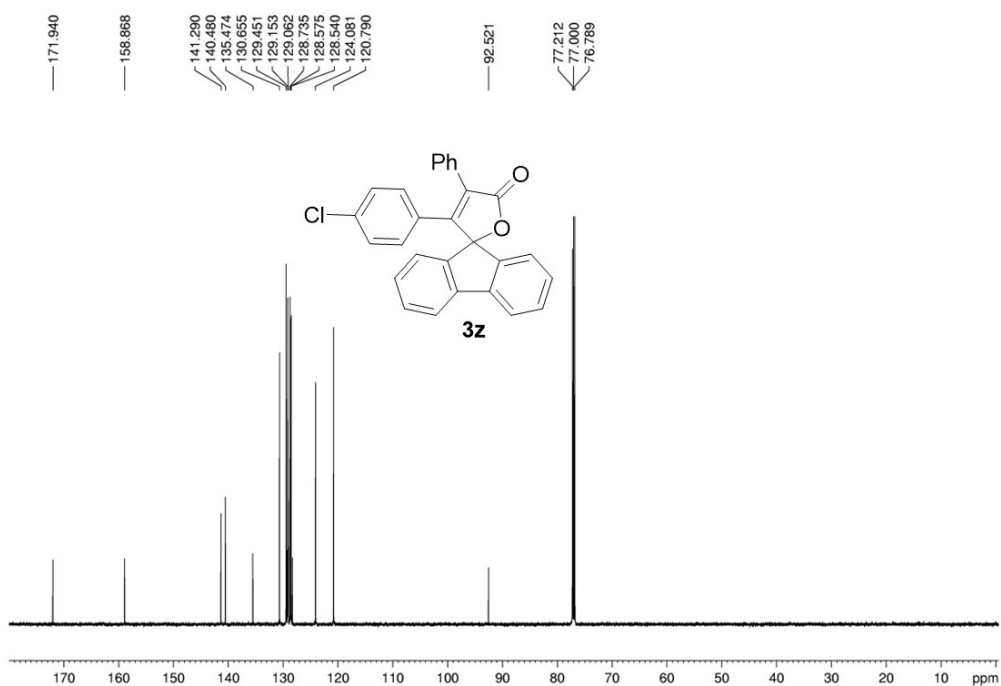

**<sup>1</sup>H NMR (600 MHz, CDCl<sub>3</sub>) and <sup>13</sup>C{<sup>1</sup>H} NMR (150 MHz, CDCl<sub>3</sub>) of 3aa**

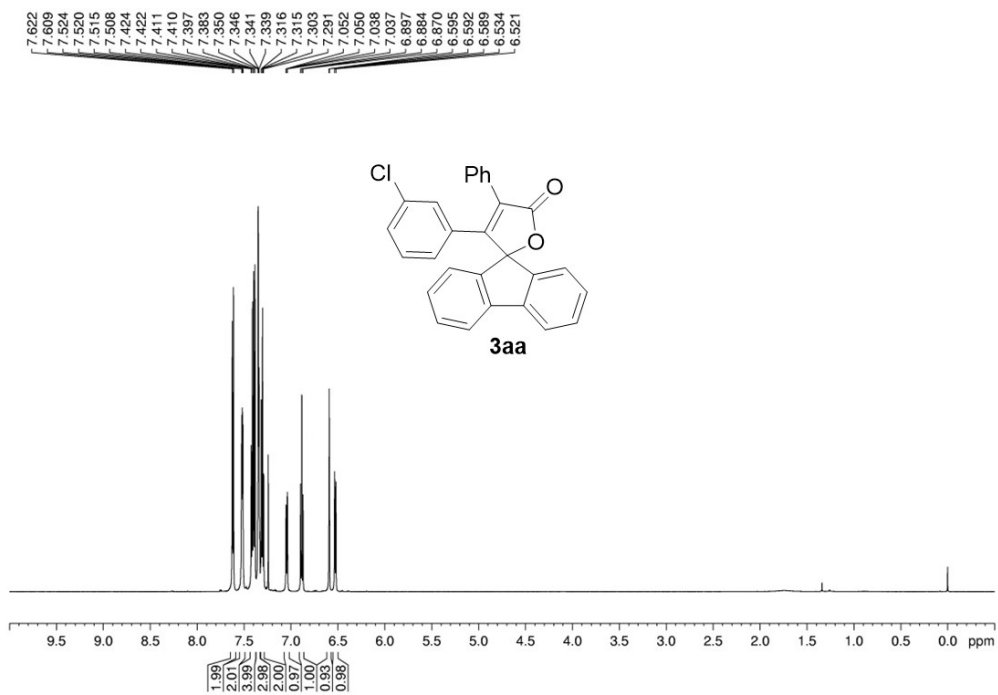

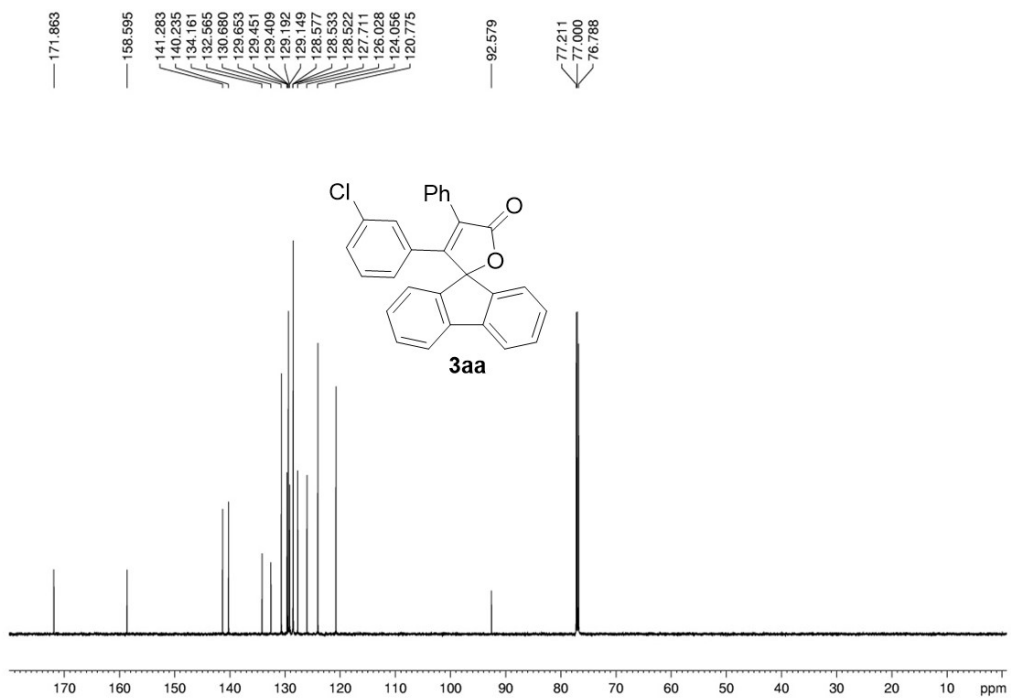

**<sup>1</sup>H NMR (600 MHz, CDCl<sub>3</sub>) and <sup>13</sup>C{<sup>1</sup>H} NMR (150 MHz, CDCl<sub>3</sub>) of 3ab**

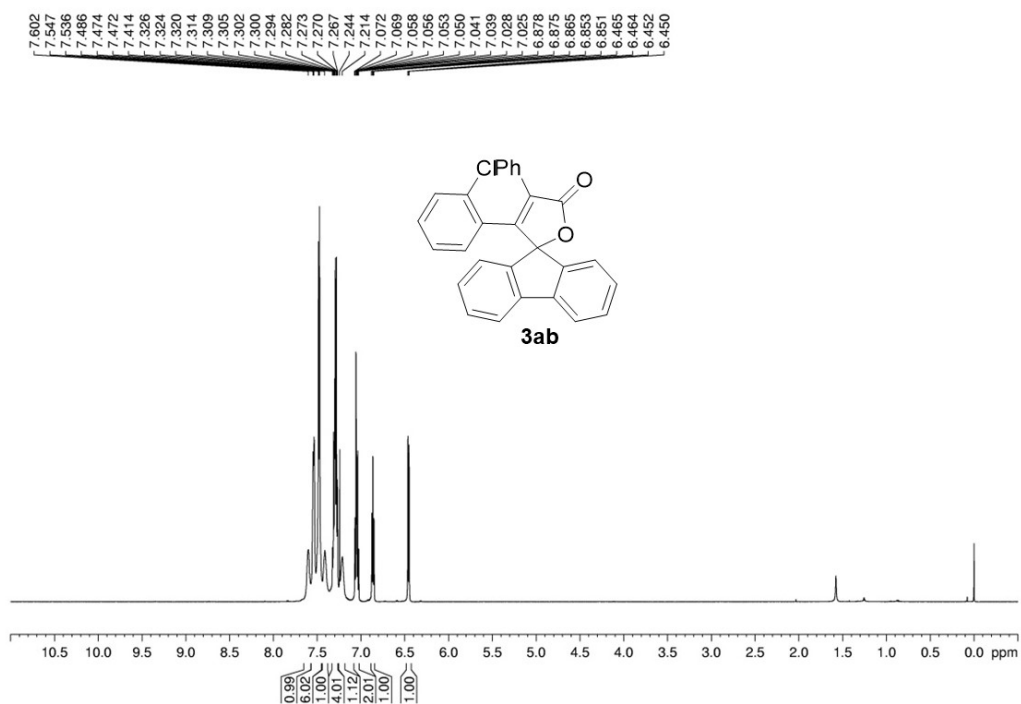

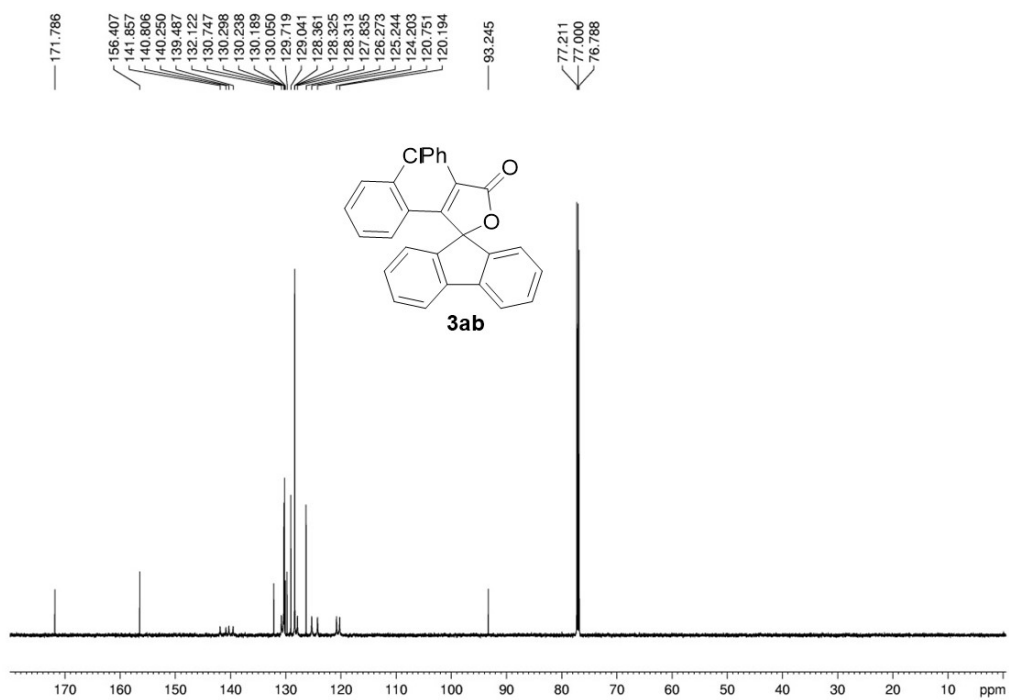

<sup>1</sup>H NMR (600 MHz, CDCl<sub>3</sub>) and <sup>13</sup>C{<sup>1</sup>H} NMR (150 MHz, CDCl<sub>3</sub>) of **3ac**

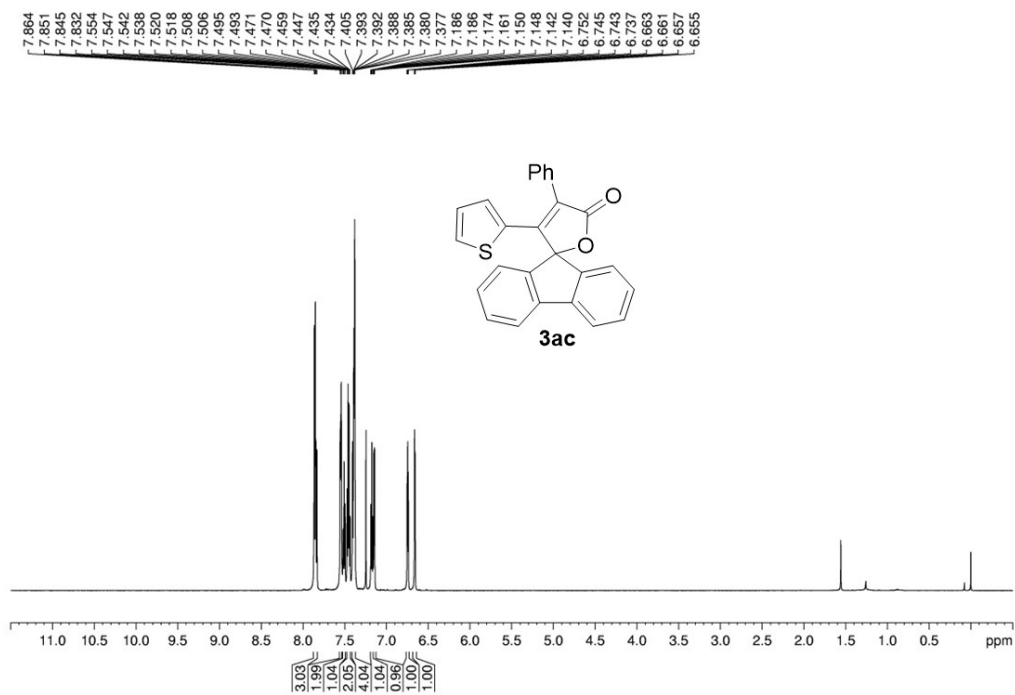

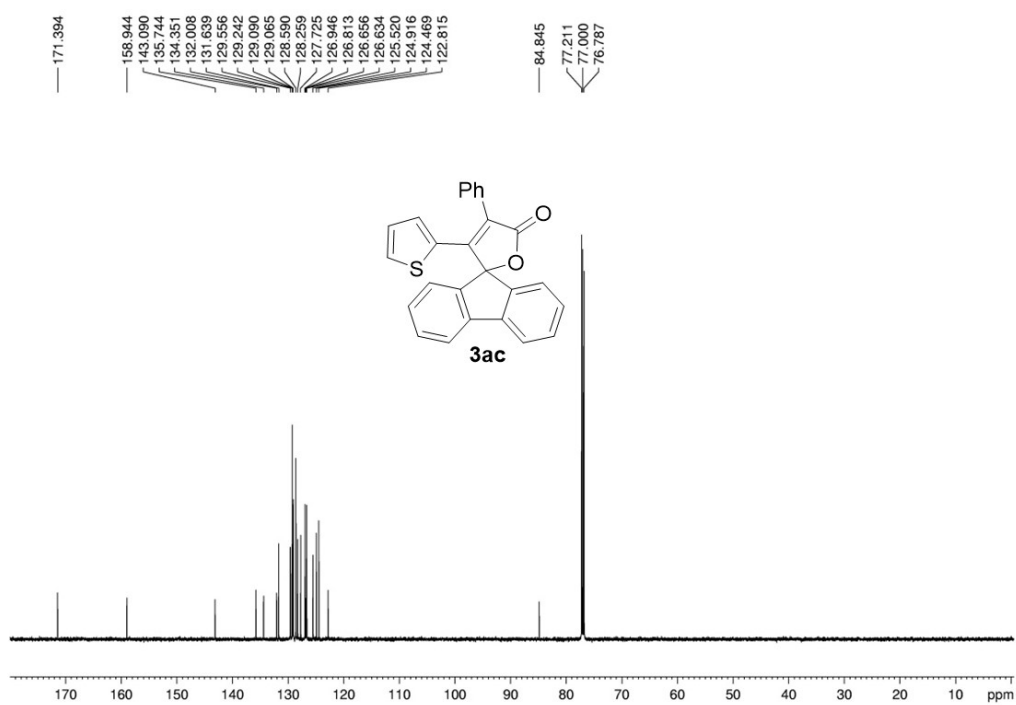

**<sup>1</sup>H NMR (600 MHz, CDCl<sub>3</sub>) and <sup>13</sup>C{<sup>1</sup>H} NMR (150 MHz, CDCl<sub>3</sub>) of 3ad**

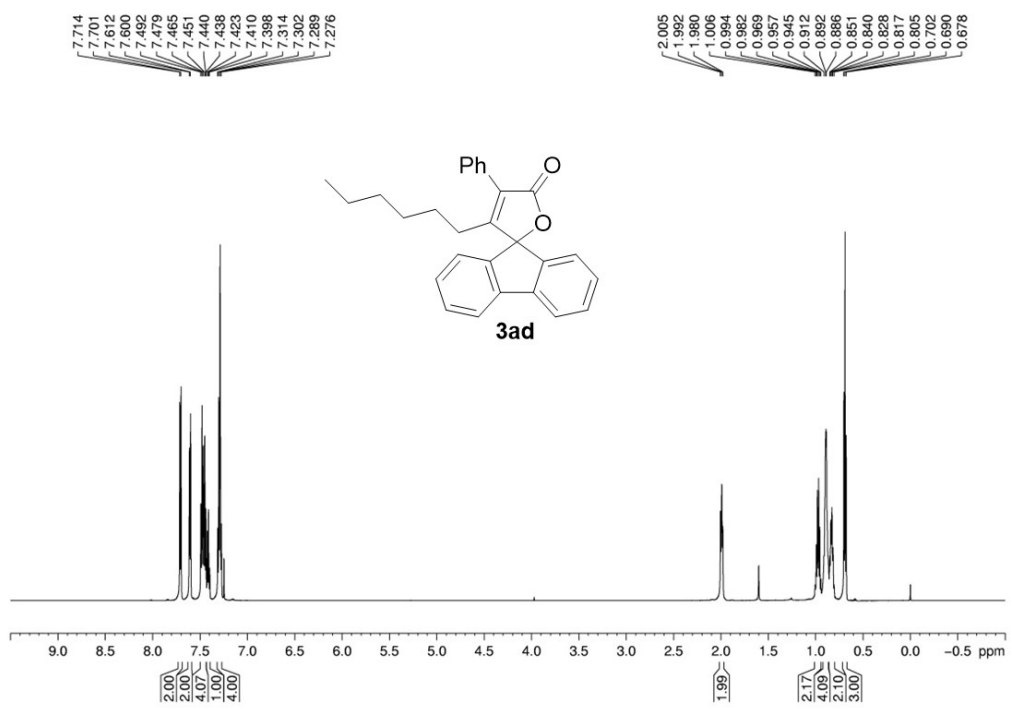



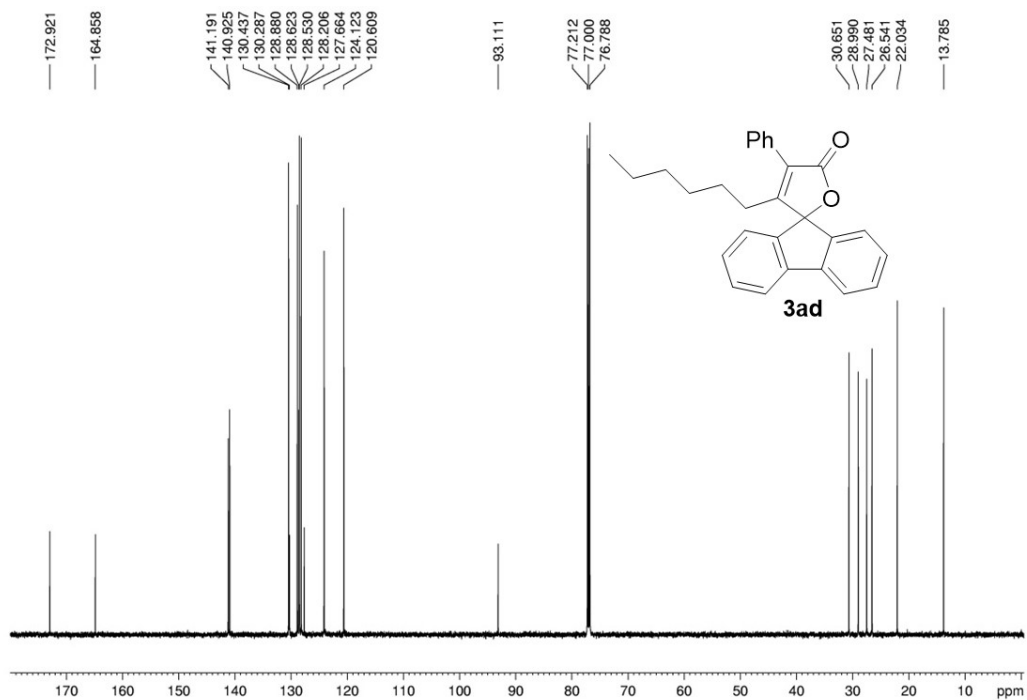

<sup>1</sup>H NMR (600 MHz, CDCl<sub>3</sub>) and <sup>13</sup>C{<sup>1</sup>H} NMR (150 MHz, CDCl<sub>3</sub>) of 3ae

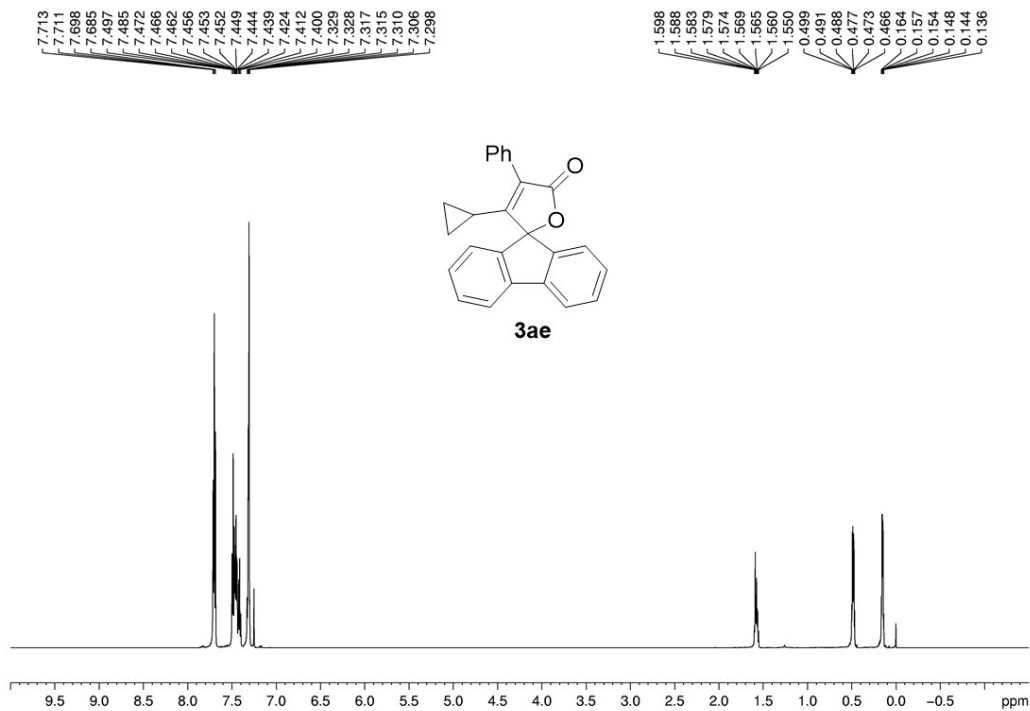

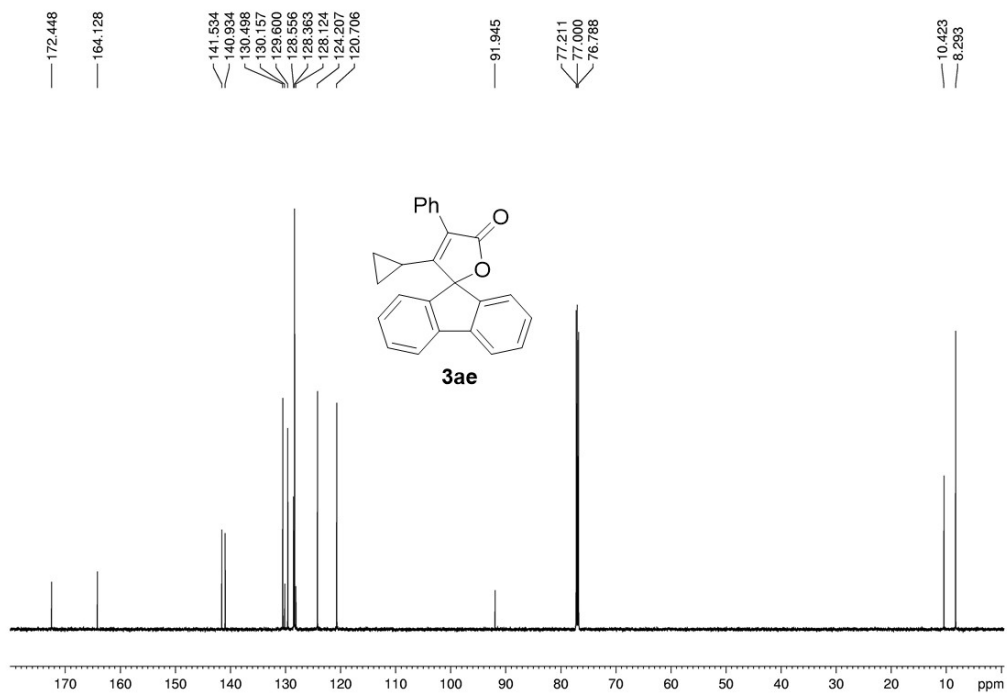

**<sup>1</sup>H NMR (600 MHz, CDCl<sub>3</sub>) and <sup>13</sup>C{<sup>1</sup>H} NMR (150 MHz, CDCl<sub>3</sub>) of 3af**

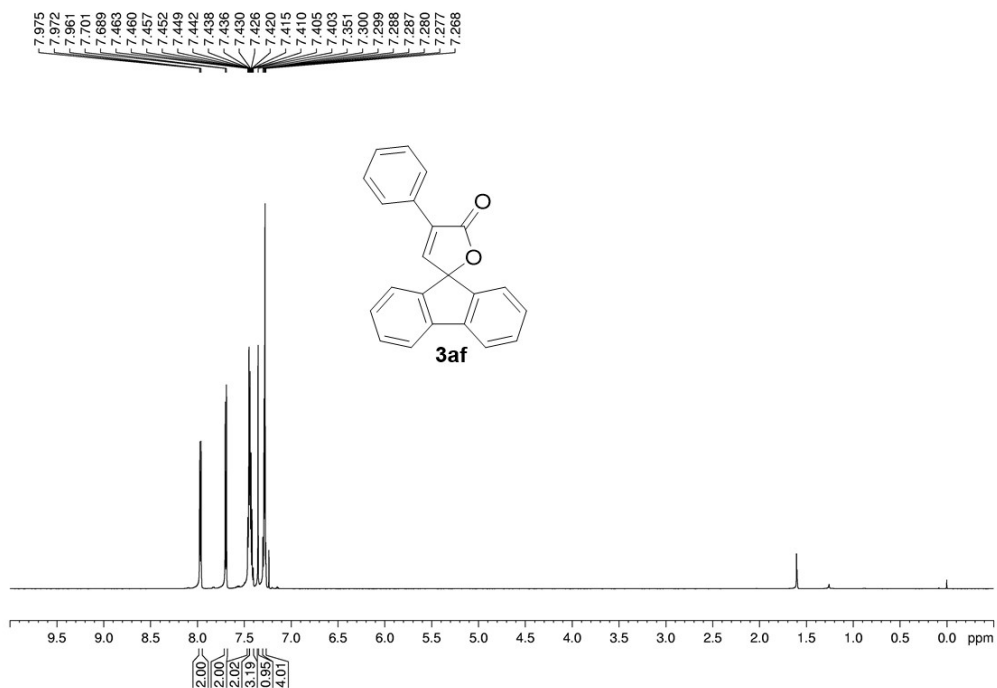

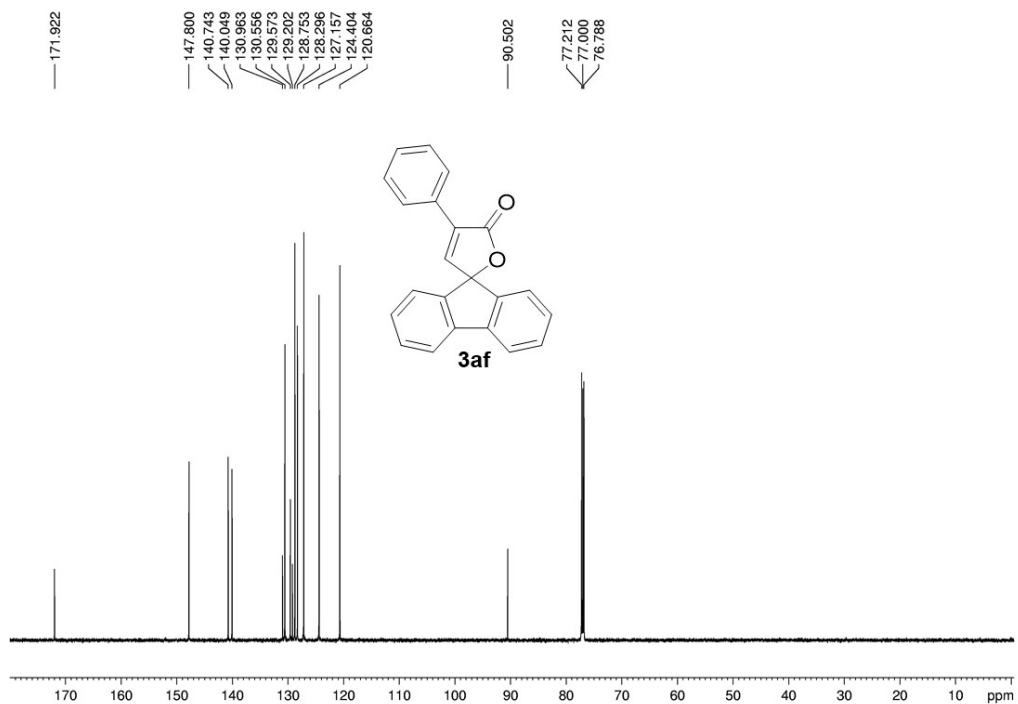

**<sup>1</sup>H NMR (600 MHz, CDCl<sub>3</sub>) and <sup>13</sup>C{<sup>1</sup>H} NMR (150 MHz, CDCl<sub>3</sub>) of 3ag**

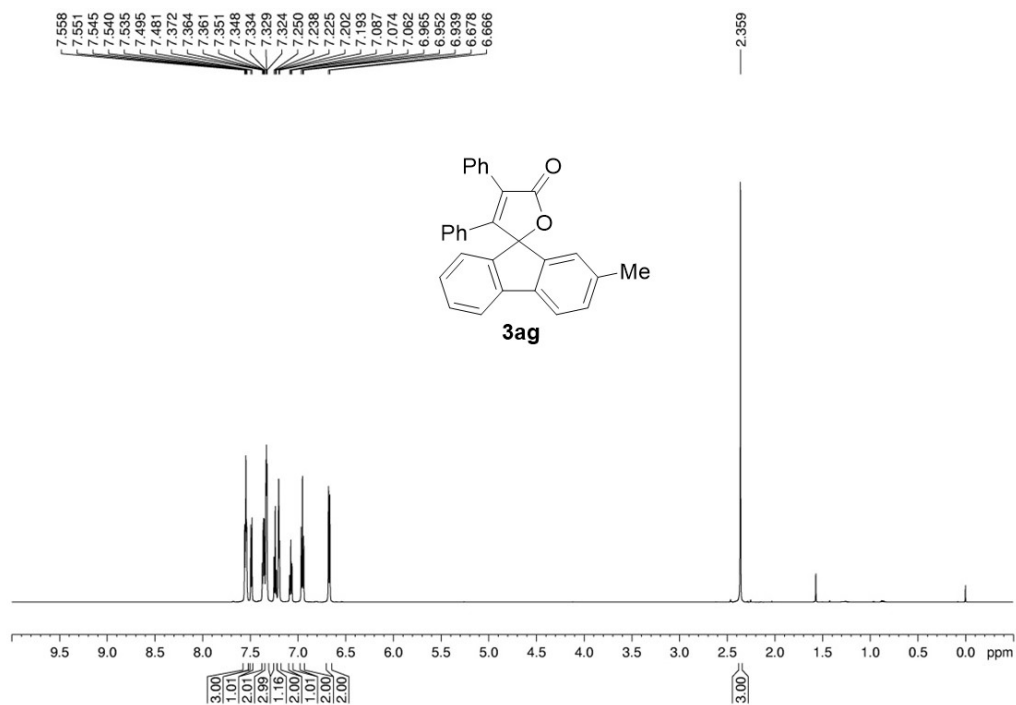

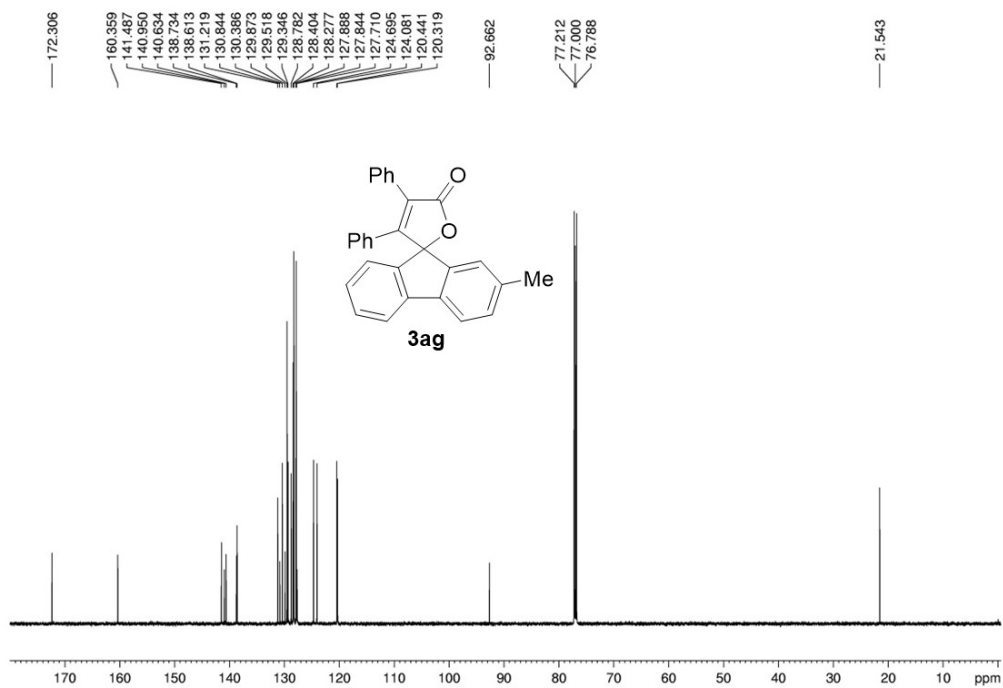

**<sup>1</sup>H NMR (600 MHz, CDCl<sub>3</sub>) and <sup>13</sup>C{<sup>1</sup>H} NMR (150 MHz, CDCl<sub>3</sub>) of 3ah**

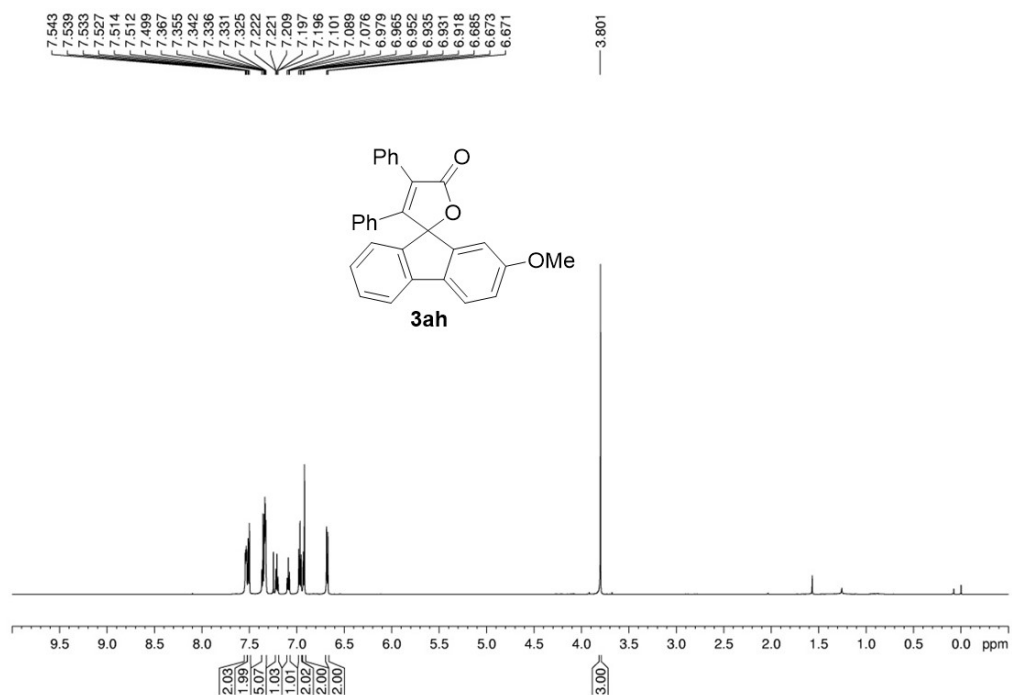

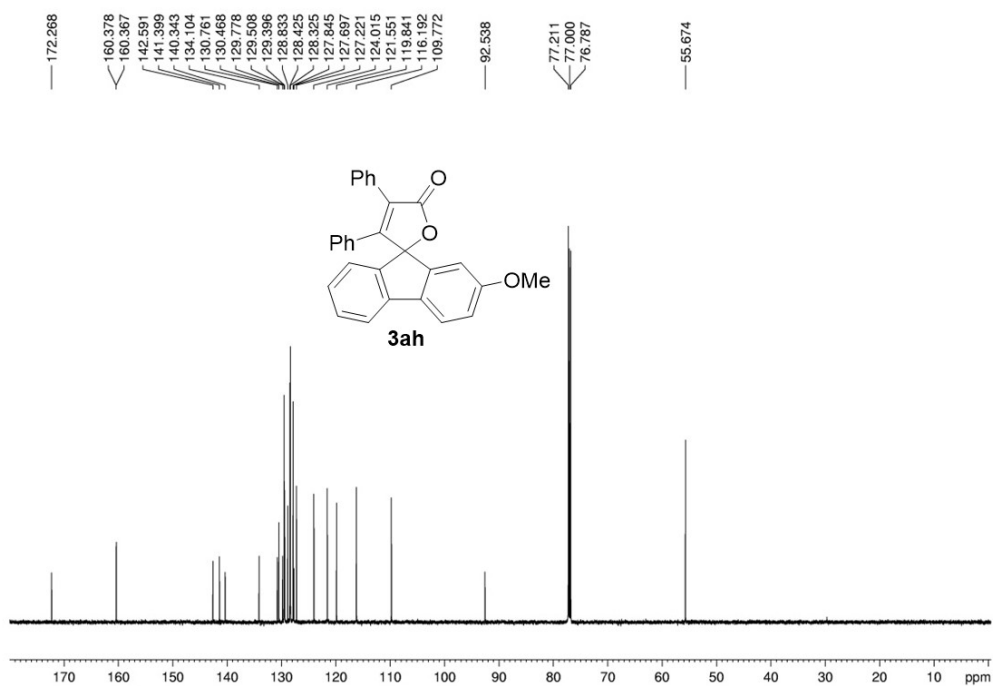

$^1\text{H}$  NMR (600 MHz,  $\text{CDCl}_3$ ),  $^{13}\text{C}\{^1\text{H}\}$  NMR (150 MHz,  $\text{CDCl}_3$ ) and  $^{19}\text{F}\{^1\text{H}\}$  NMR (565 MHz,  $\text{CDCl}_3$ ) of **3ai**

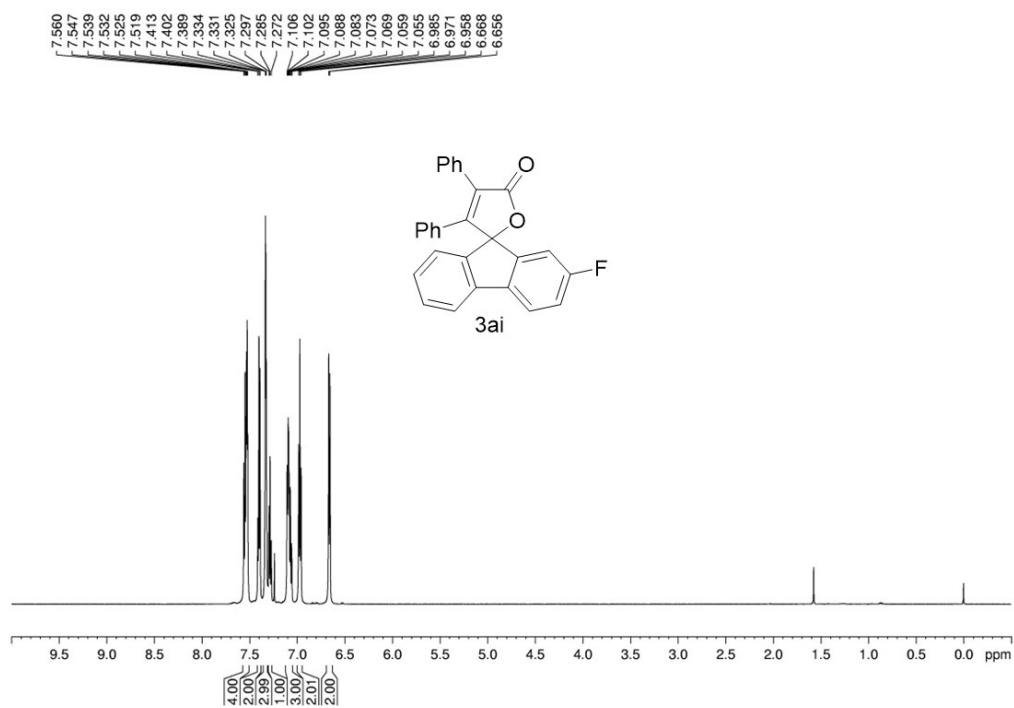

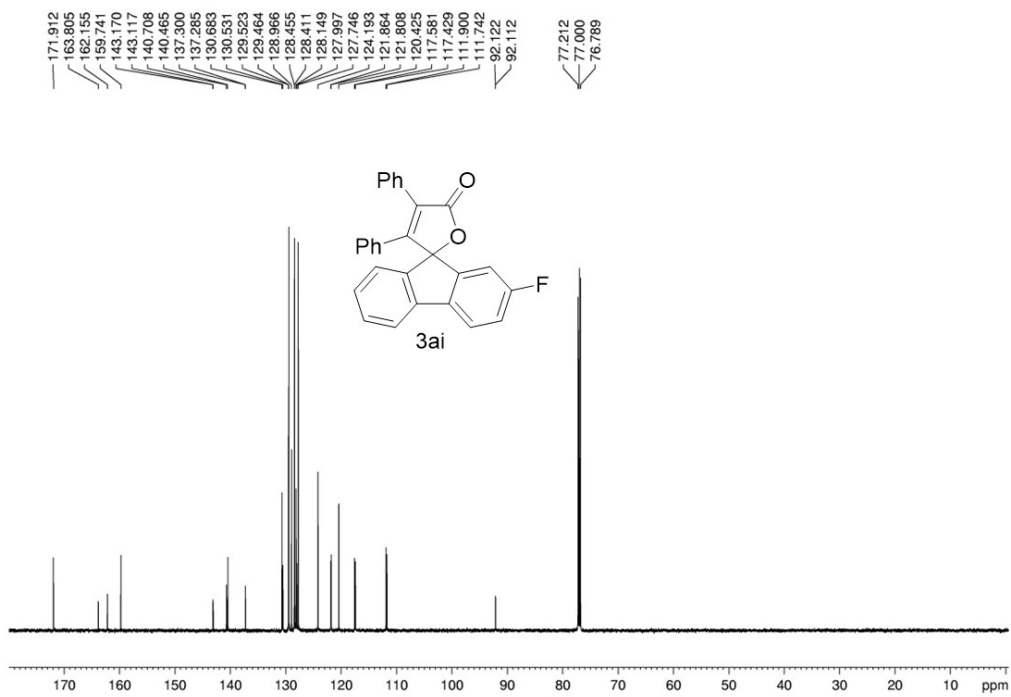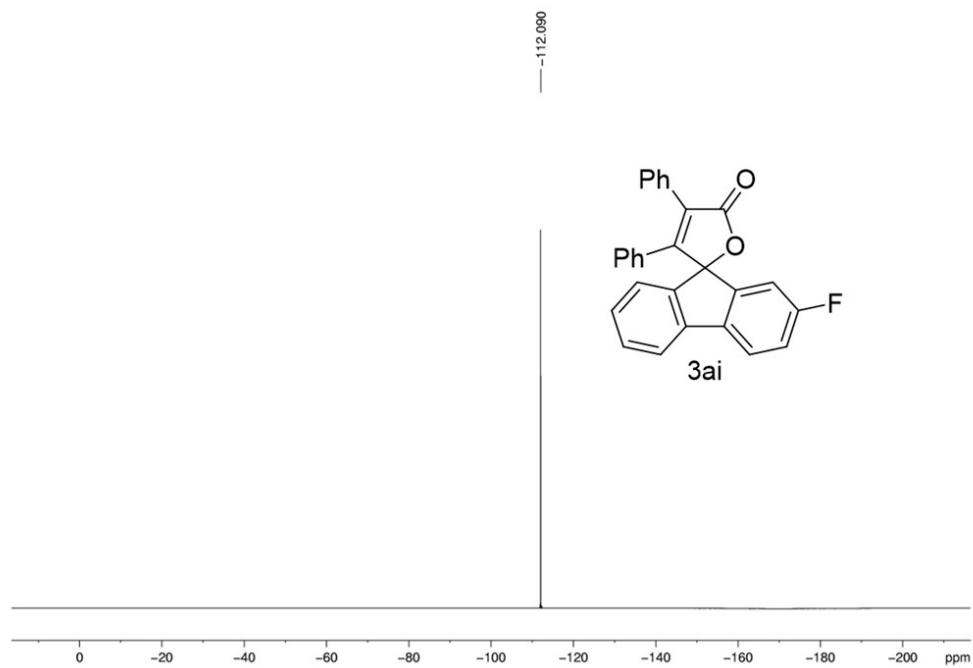

$^1\text{H}$  NMR (600 MHz,  $\text{CDCl}_3$ ) and  $^{13}\text{C}\{^1\text{H}\}$  NMR (150 MHz,  $\text{CDCl}_3$ ) of **3aj**

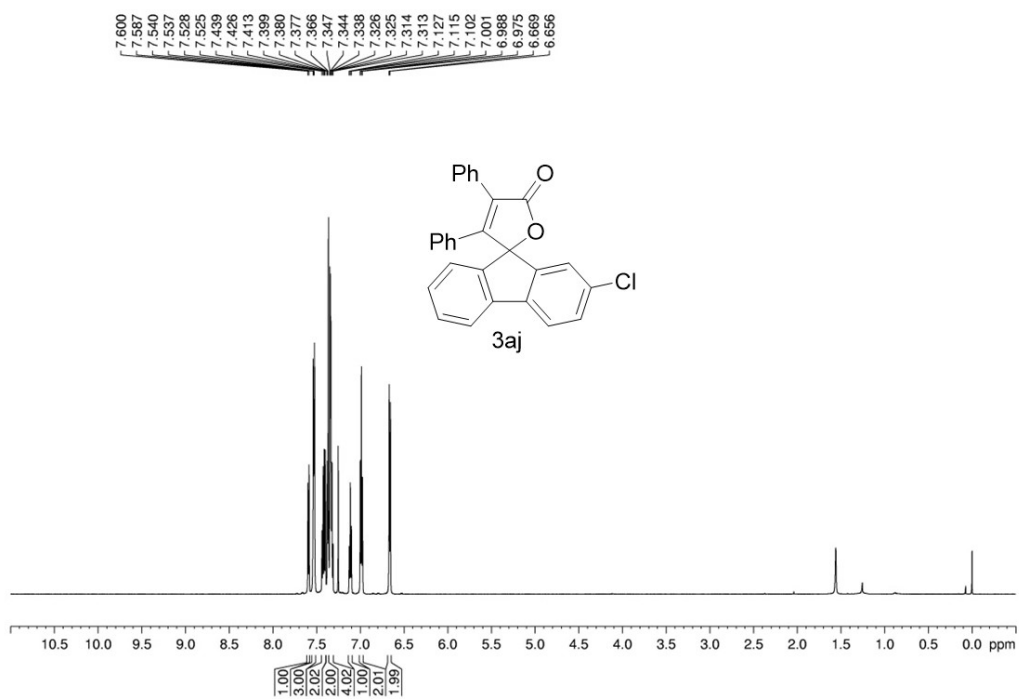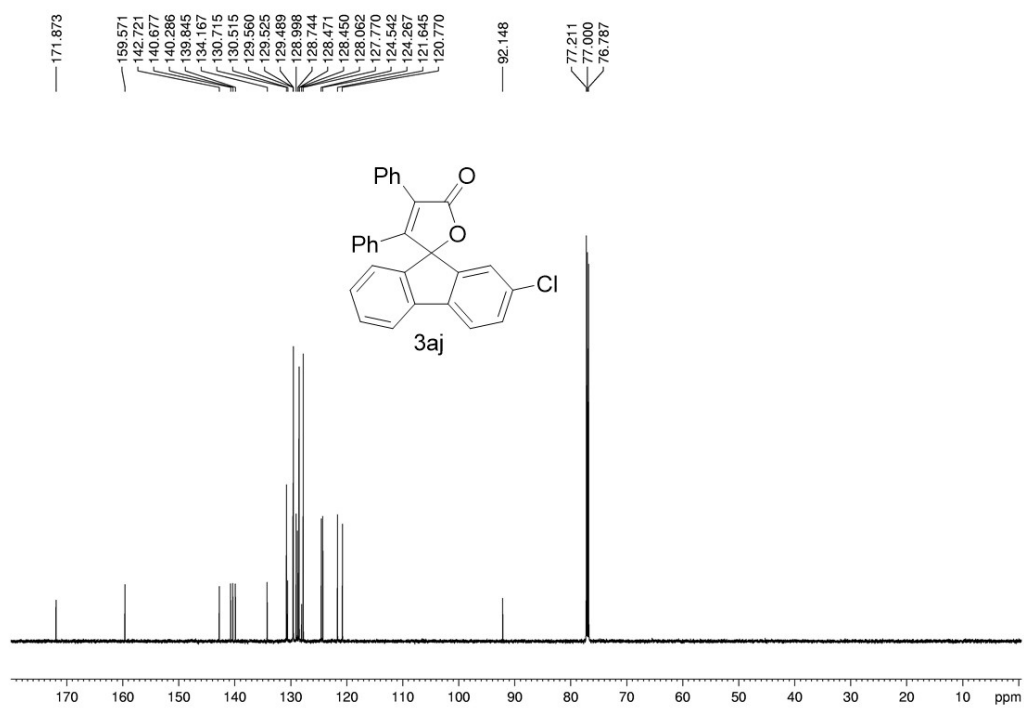

$^1\text{H}$  NMR (600 MHz,  $\text{CDCl}_3$ ) and  $^{13}\text{C}\{^1\text{H}\}$  NMR (150 MHz,  $\text{CDCl}_3$ ) of **3ak**

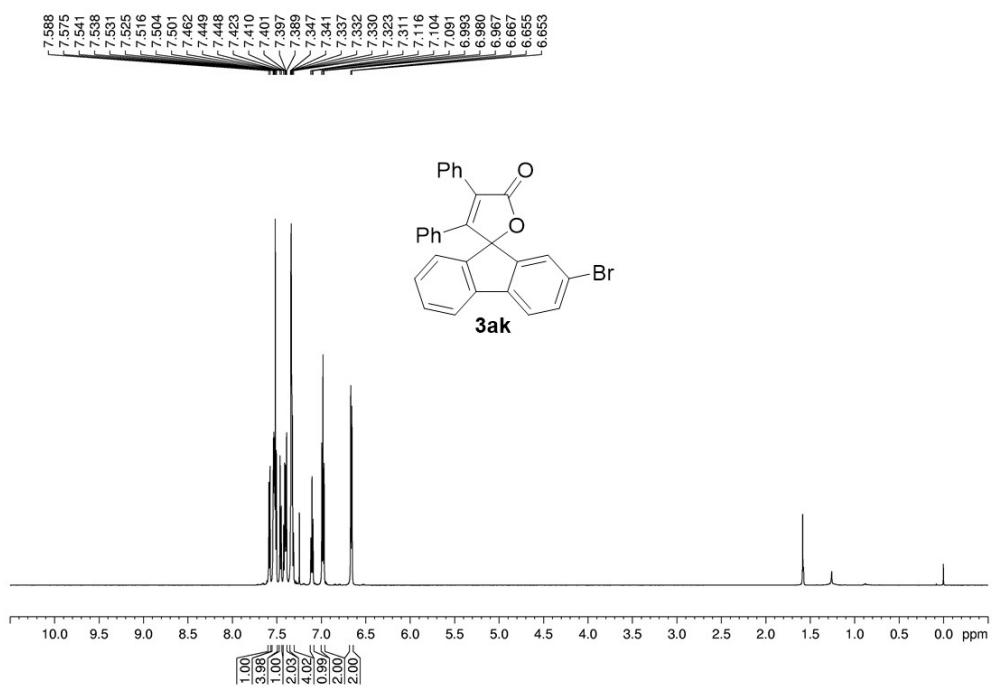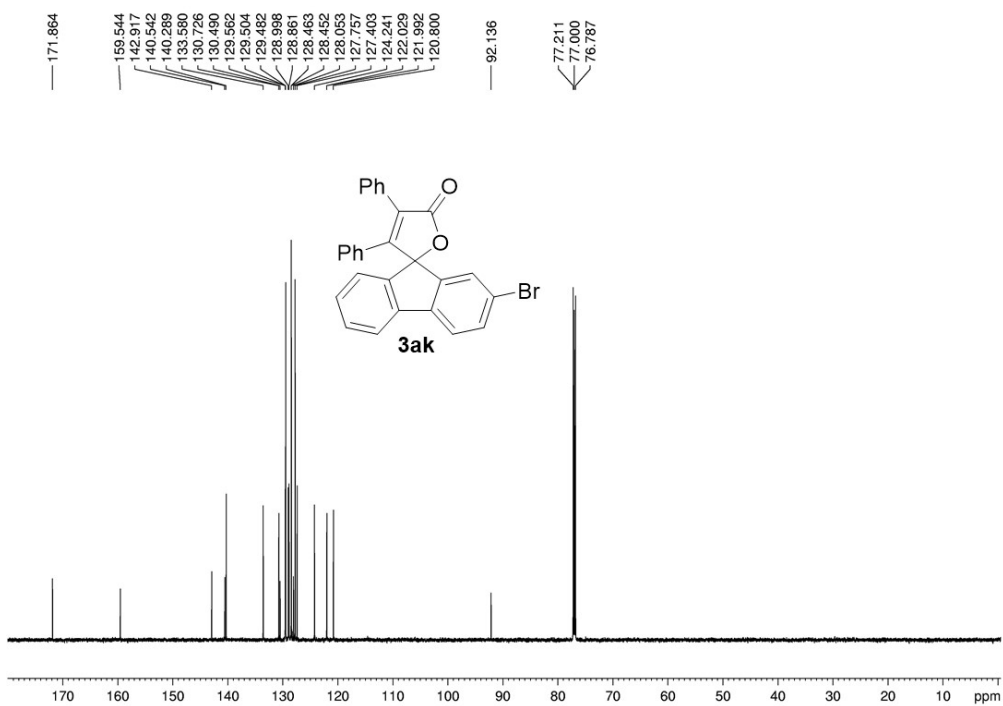

<sup>1</sup>H NMR (600 MHz, DMSO) and <sup>13</sup>C{<sup>1</sup>H} NMR (150 MHz, DMSO) of **3ak**



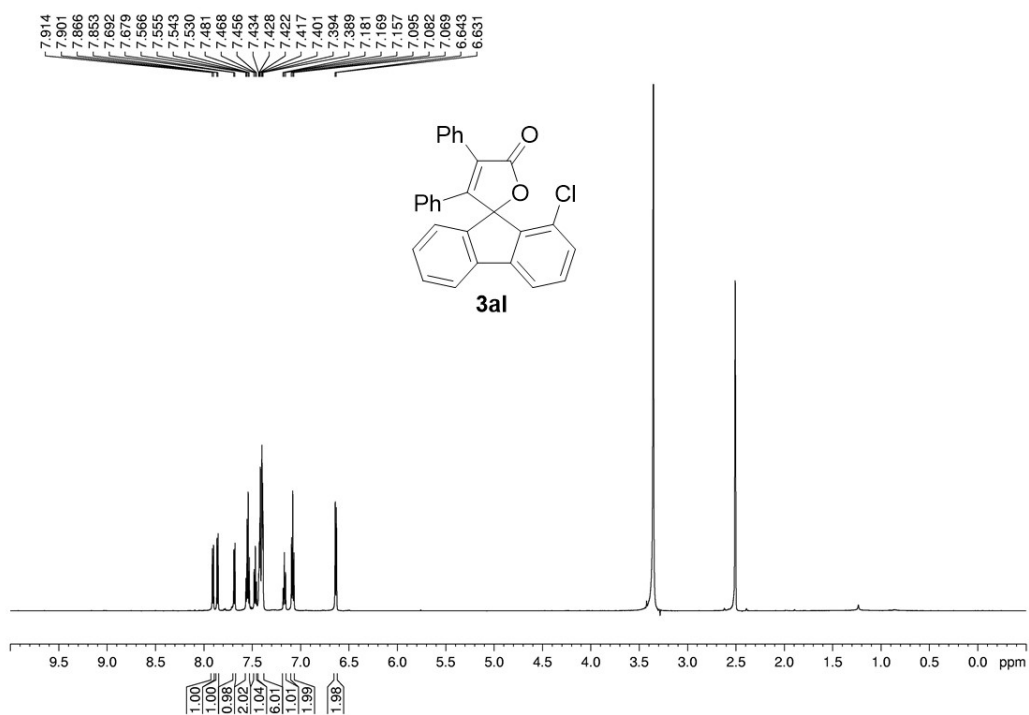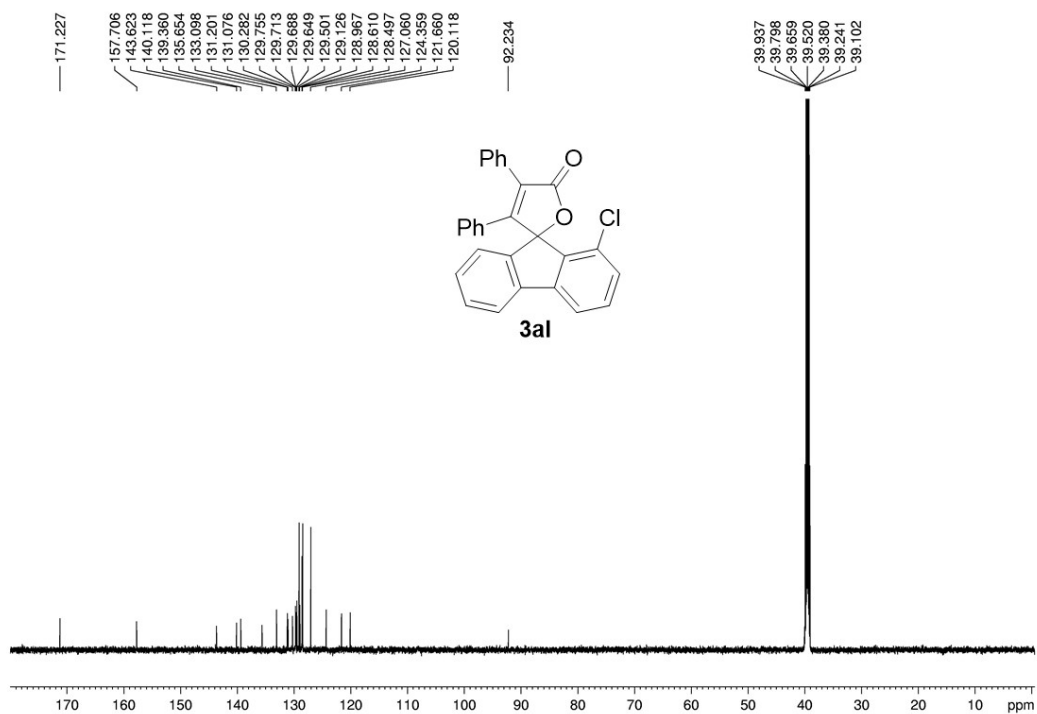

**<sup>1</sup>H NMR (600 MHz, DMSO) and <sup>13</sup>C{<sup>1</sup>H} NMR (150 MHz, DMSO) of 3al'**

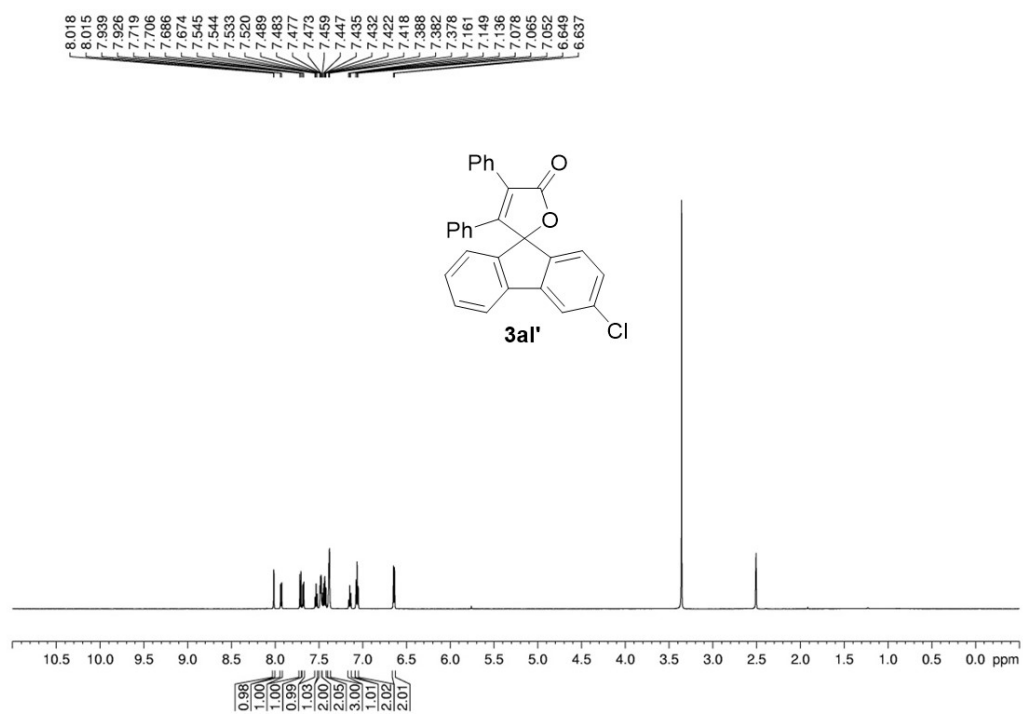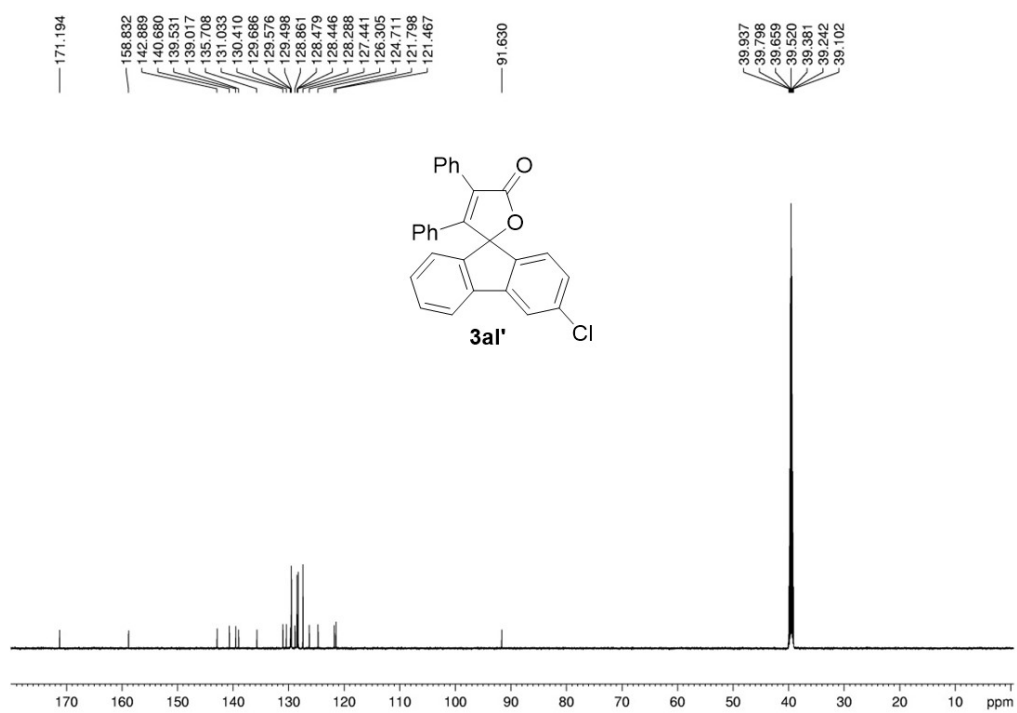

<sup>1</sup>H NMR (600 MHz, CDCl<sub>3</sub>) and <sup>13</sup>C{<sup>1</sup>H} NMR (150 MHz, CDCl<sub>3</sub>) of **3am**

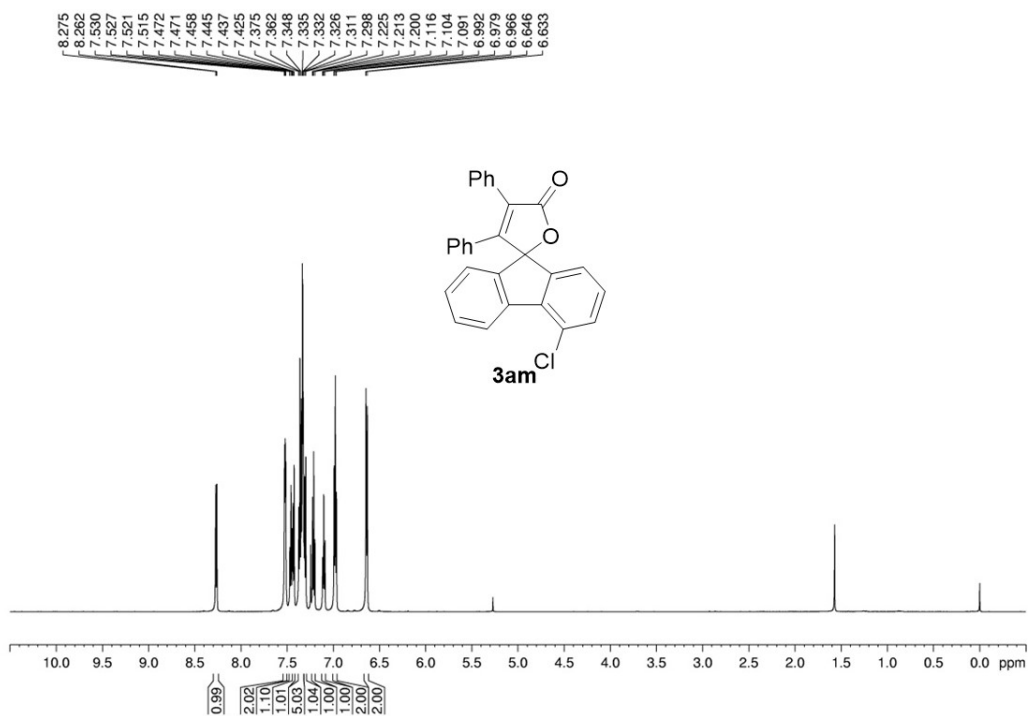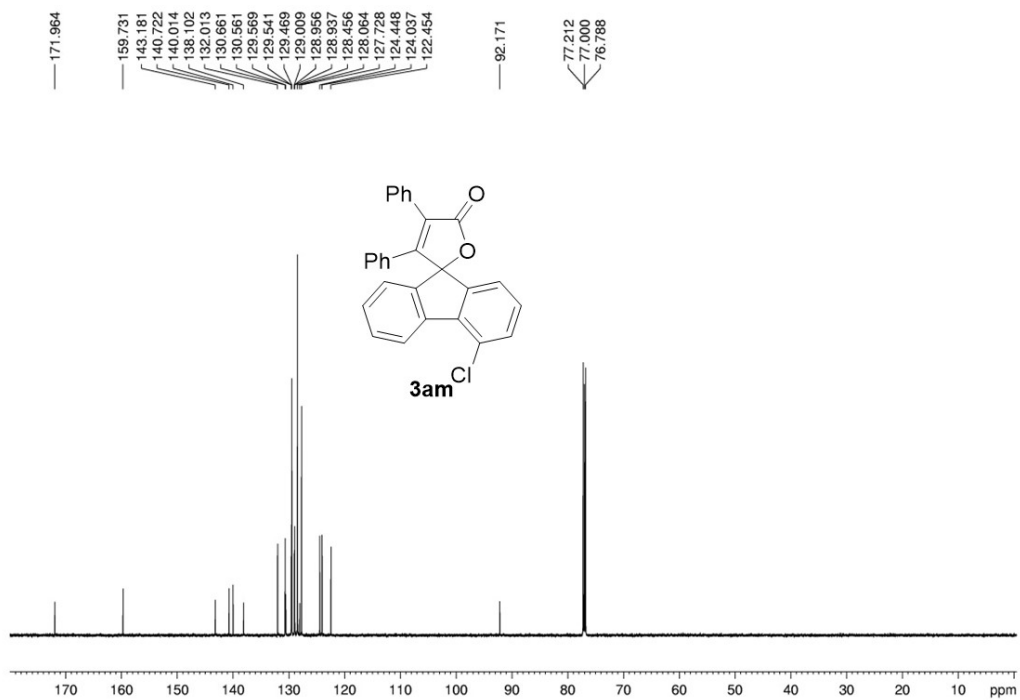

<sup>1</sup>H NMR (600 MHz, CDCl<sub>3</sub>) and <sup>13</sup>C{<sup>1</sup>H} NMR (150 MHz, CDCl<sub>3</sub>) of **4**

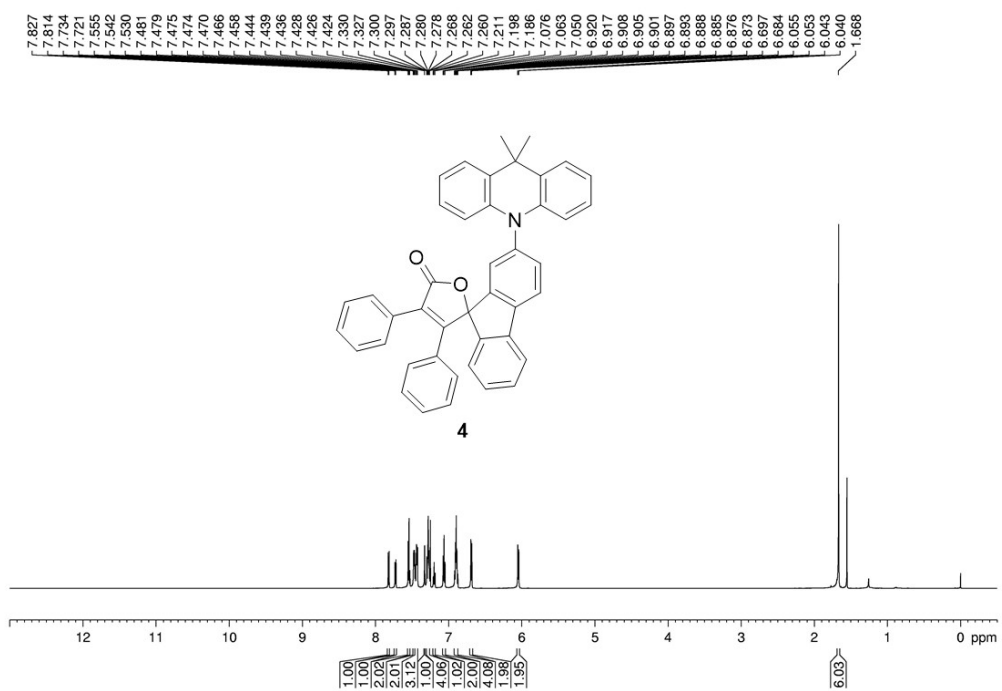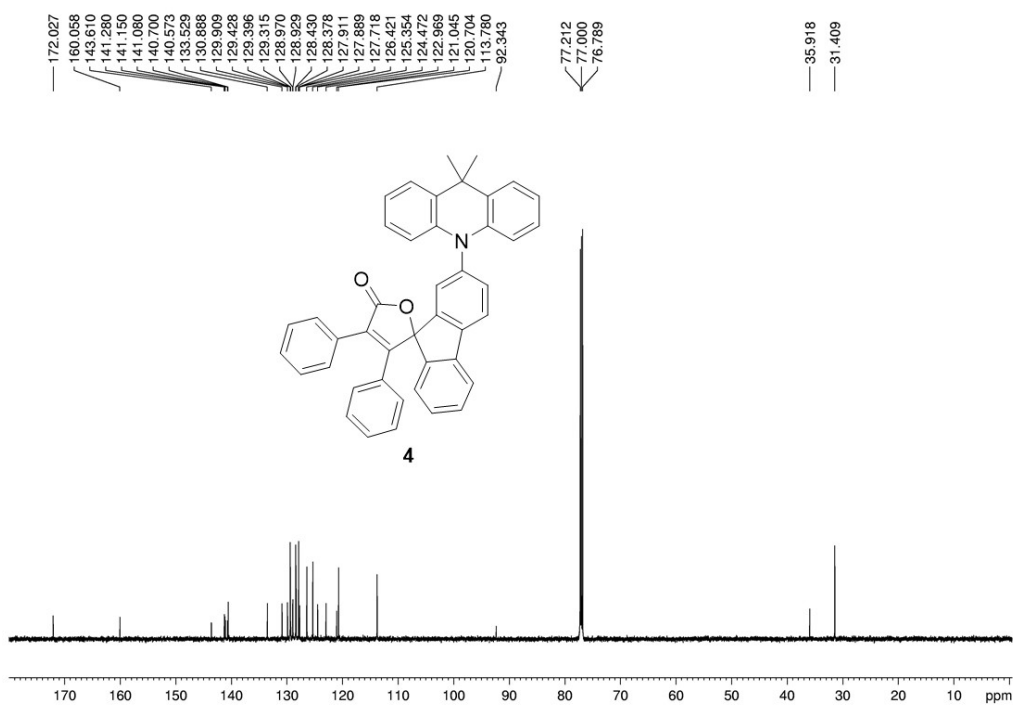

<sup>1</sup>H NMR (600 MHz, CDCl<sub>3</sub>) and <sup>13</sup>C{<sup>1</sup>H} NMR (150 MHz, CDCl<sub>3</sub>) of **5**

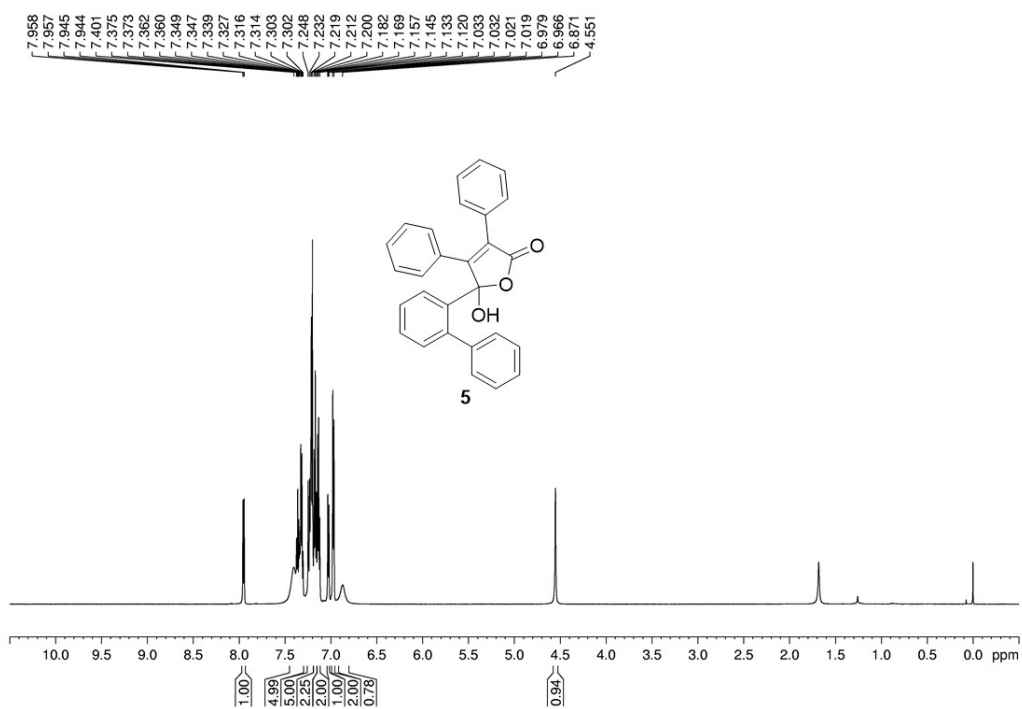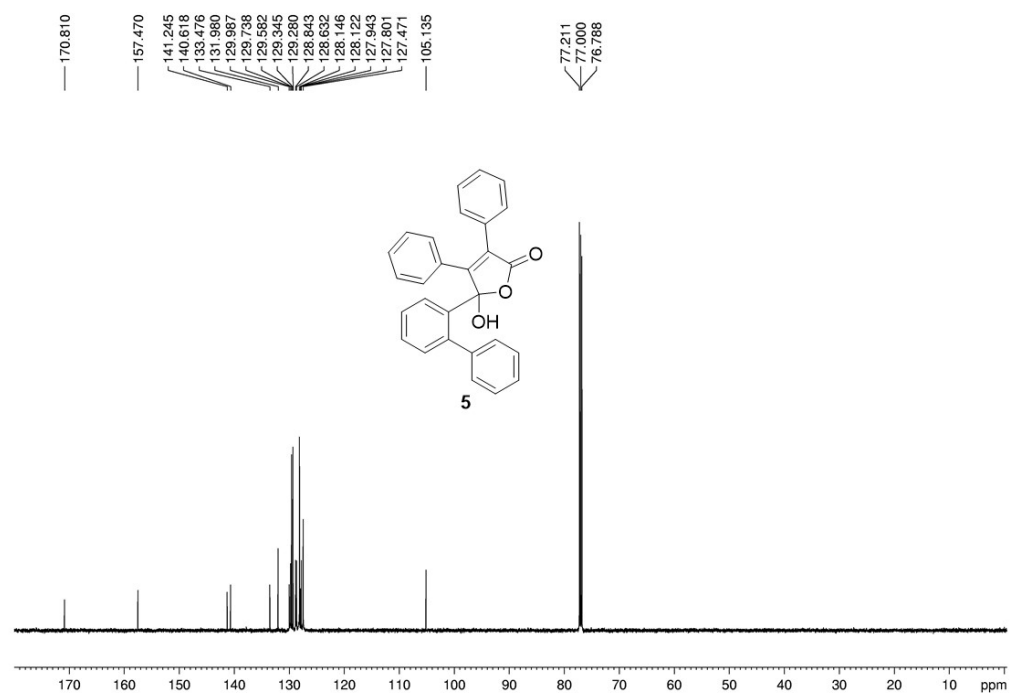

Supplement: d2qo01523d1.pdf [file d2qo01523d1.pdf]
